# Supplementary material for: Enantioselective synthesis of 4-aryl-3,4-dihydrocoumarins via N-heterocyclic carbene catalyzed β-arylation/cyclization of α-bromoenals
Source: Royal Society of Chemistry journal article supplement (doi:10.1039/d4ob00756e), 2024-01-01
Supplement: d4ob00756e1.pdf [file d4ob00756e1.pdf]

## *Supporting Information*

### **Enantioselective Synthesis of 4-Aryl-3,4-Dihydrocoumarins via N-Heterocyclic Carbene Catalyzed $\beta$ -Arylation/Cyclization of $\alpha$ -Bromoenals**

#### **Table of Contents**

|                                                                                     |     |
|-------------------------------------------------------------------------------------|-----|
| 1. General information .....                                                        | S2  |
| 2. General Procedure for the Synthesis of Products 3 and Characterization Data..... | S2  |
| 3. Product Transformation.....                                                      | S12 |
| 4. X-Ray Crystal Structure of Enantiopure 3ac.....                                  | S13 |
| 5. Reference.....                                                                   | S14 |
| 6. $^1\text{H}$ , $^{19}\text{F}$ , $^{13}\text{C}$ NMR Spectra.....                | S15 |

## 1. General information

Unless otherwise noted, all starting materials were obtained from commercial supplies and directly used without further purification unless otherwise stated. Unless otherwise indicated, all reactions were carried out under N<sub>2</sub> atmosphere with magnetic stirring. Column chromatography was performed on 300-400 mesh silica gel. Anhydrous toluene and diethyl ether were distilled from sodium and benzophenone.  $\alpha$ -Bromoaldehydes<sup>[1]</sup> and chiral triazolium salts A-D<sup>[2]</sup> were synthesized according to literatures. All <sup>1</sup>H, <sup>13</sup>C, and <sup>19</sup>F NMR spectrometers were recorded on Bruker-400 MHz instruments internally referenced to tetramethylsilane (0.0 ppm) or residue of CDCl<sub>3</sub> (7.26 ppm) signal. <sup>1</sup>H NMR Spectroscopy splitting patterns were designated as singlet (s), doublet (d), triplet (t), quartet (q). Melting points were measured using a XT4A microscopic apparatus. IR spectra were obtained on a Bruker VECTOR22 spectrophotometer in KBr pellets. The substrates 1a-1x<sup>1</sup> were synthesized according to published procedures. Chiral high-performance liquid chromatography (HPLC) analysis was performed using an Agilent 1260 with commercial ChiralPak 4.6 × 250 mm columns.

## 2. General Procedure for the Synthesis of Products 3 and Characterization Data

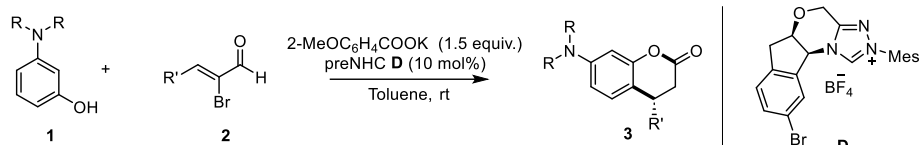

A mixture of phenol (**1**, 0.2 mmol),  $\alpha$ -bromoaldehydes (**2**, 1.5 equiv.), PreNHC **D** (10 mol%), 2-OMeC<sub>6</sub>H<sub>4</sub>COOK (1.5 equiv.) and toluene (2.0 mL) were added to a 10 mL Schlenk reaction tube under a nitrogen atmosphere. The reaction mixture was stirred at room temperature. After the reaction was complete (monitored by TLC), the mixture was concentrated to dryness. The residue was purified by flash column chromatography to afford the desired product **3** (petroleum ether : ethyl acetate = 20 : 1).

### Characterization data of the products.

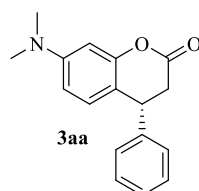

(170, experiment #)

#### (R)-7-(dimethylamino)-4-phenylchroman-2-one

49.7 mg, 93% yield. White solid, m.p. 109-110 °C. R<sub>f</sub> = 0.3 (petroleum ether/ethyl acetate 4:1). [ $\alpha$ ]<sub>D</sub><sup>25</sup> = -28.0 (c = 0.1 in CHCl<sub>3</sub>), 93:7 er, determined by HPLC analysis [Daicel CHIRALPAK IC column, *n*-hexane/*i*-PrOH = 90/10, 1.0 mL/min,  $\lambda$  = 254 nm, t (minor) = 31.1 min, t (major) = 33.0 min]; <sup>1</sup>H NMR (400 MHz, CDCl<sub>3</sub>)  $\delta$  7.34 – 7.30 (m, 2H), 7.27 – 7.23 (m, 1H), 7.16 – 7.14 (m, 2H), 6.80 (d, *J* = 8.5, 1H), 6.45 (d, *J* = 2.5 Hz, 1H), 6.42 (dd, *J* = 8.5, 2.6 Hz, 1H), 4.29 – 4.18

(t,  $J = 6.8$ , 1H), 3.04 (dd,  $J = 15.8$ , 6.0 Hz, 1H), 2.98 – 2.93 (m, 7H).  $^{13}\text{C NMR}$  (101 MHz,  $\text{CDCl}_3$ )  $\delta$  168.4, 152.7, 151.1, 141.5, 129.1, 128.7, 127.6, 127.4, 112.8, 108.7, 100.5, 40.5, 40.0, 37.8. **IR** (KBr)  $\nu$  3028, 2917, 2849, 1765, 1633, 1133, 803, 703. **HRMS** (ESI) calcd for  $\text{C}_{17}\text{H}_{18}\text{O}_2\text{N}$  ( $[\text{M}+\text{H}]^+$ ) 268.1338 found 268.1339.

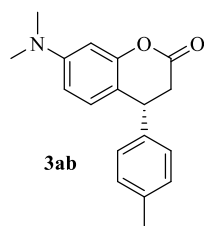

(149, experiment #)

**(R)-7-(dimethylamino)-4-(p-tolyl)chroman-2-one**

43 mg, 77% yield. White solid, m.p. 83-84 °C.  $R_f = 0.4$  (petroleum ether/ethyl acetate 4:1).  $[\alpha]_D^{25} = -3.1$  ( $c = 0.1$  in  $\text{CHCl}_3$ ), 93:7 er, determined by HPLC analysis [Daicel CHIRALPAK IA column,  $n$ -hexane/ $i$ -PrOH = 90/10, 1.0 mL/min,  $\lambda = 254$  nm,  $t$  (minor) = 13.5 min,  $t$  (major) = 9.4 min];  $^1\text{H NMR}$  (400 MHz,  $\text{CDCl}_3$ )  $\delta$  7.14 (d,  $J = 7.9$  Hz, 2H), 7.05 (d,  $J = 8.1$  Hz, 2H), 6.81 (d,  $J = 8.4$  Hz, 1H), 6.50 – 6.41 (m, 2H), 4.22 (t,  $J = 6.8$  Hz, 1H), 3.03 (dd,  $J = 15.7$ , 6.0 Hz, 1H), 2.97 – 2.92 (m, 7H), 2.33 (s, 3H).  $^{13}\text{C NMR}$  (101 MHz,  $\text{CDCl}_3$ )  $\delta$  168.5, 152.7, 151.1, 138.5, 137.1, 129.7, 128.7, 127.5, 113.2, 108.7, 100.6, 40.5, 39.7, 37.9, 21.1. **IR** (KBr)  $\nu$  2917, 2851, 2815, 1755, 1130, 823, 797. **HRMS** (ESI) calcd for  $\text{C}_{18}\text{H}_{20}\text{O}_2\text{N}$  ( $[\text{M}+\text{H}]^+$ ) 282.1494 found 282.1492.

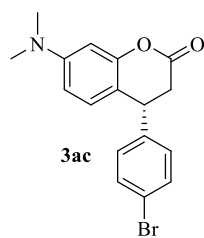

(138, experiment #)

**(R)-4-(4-bromophenyl)-7-(dimethylamino)chroman-2-one**

56 mg, 82% yield. White solid, m.p. 86-87 °C.  $R_f = 0.4$  (petroleum ether/ethyl acetate 4:1).  $[\alpha]_D^{25} = -14.2$  ( $c = 0.1$  in  $\text{CHCl}_3$ ), 93:7 er, determined by HPLC analysis [Daicel CHIRALPAK IC column,  $n$ -hexane/ $i$ -PrOH = 90/10, 1.0 mL/min,  $\lambda = 254$  nm,  $t$  (minor) = 33.3 min,  $t$  (major) = 31.6 min];  $^1\text{H NMR}$  (400 MHz,  $\text{CDCl}_3$ )  $\delta$  7.44 (d,  $J = 8.4$  Hz, 2H), 7.03 (d,  $J = 8.4$  Hz, 2H), 6.79 (d,  $J = 8.2$  Hz, 1H), 6.45 – 6.42 (m, 2H), 4.21 (t,  $J = 6.7$  Hz, 1H), 3.03 (dd,  $J = 15.7$ , 6.0 Hz, 1H), 2.95 – 2.88 (m, 7H).  $^{13}\text{C NMR}$  (101 MHz,  $\text{CDCl}_3$ )  $\delta$  167.9, 152.7, 151.3, 140.7, 132.2, 129.4, 128.6, 121.3, 112.1, 108.8, 100.6, 40.5, 39.6, 37.7. **IR** (KBr)  $\nu$  2922, 2852, 2806, 1749, 1630, 1113, 826, 809. **HRMS** (ESI) calcd for  $\text{C}_{17}\text{H}_{17}\text{O}_2\text{NBr}$  ( $[\text{M}+\text{H}]^+$ ) 346.0443 found 346.0449.

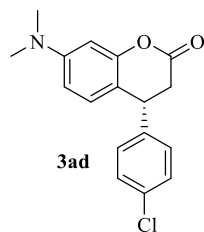

(140, experiment #)

**(R)-4-(4-chlorophenyl)-7-(dimethylamino)chroman-2-one**

54 mg, 87% yield. White solid, m.p. 92-93 °C.  $R_f = 0.3$  (petroleum ether/ethyl acetate 4:1).  $[\alpha]_D^{25} = -31.1$  ( $c = 0.1$  in  $\text{CHCl}_3$ ), 93:7 er, determined by HPLC analysis [Daicel CHIRALPAK IA column,  $n$ -hexane/ $i$ -PrOH = 90/10, 1.0 mL/min,  $\lambda = 254$  nm,  $t$  (minor) = 31.1 min,  $t$  (major) = 29.3 min];

**<sup>1</sup>H NMR** (400 MHz, CDCl<sub>3</sub>) δ 7.29 (d, *J* = 8.4 Hz, 2H), 7.08 (d, *J* = 8.4 Hz, 2H), 6.79 (d, *J* = 8.1 Hz, 1H), 6.45 – 6.42 (m, 2H), 4.23 (t, *J* = 6.6 Hz, 1H), 3.03 (dd, *J* = 15.7, 6.0 Hz, 1H), 2.95 – 2.89 (m, 7H). **<sup>13</sup>C NMR** (101 MHz, CDCl<sub>3</sub>) δ 168.0, 152.6, 151.2, 140.1, 133.2, 129.2, 129.0, 128.6, 112.1, 108.7, 100.5, 40.5, 39.5, 37.7. **IR** (KBr)  $\nu$  2986, 2916, 2814, 1766, 1628, 1132, 838, 805. **HRMS** (ESI) calcd for C<sub>17</sub>H<sub>17</sub>O<sub>2</sub>NCl ([M+H]<sup>+</sup>) 302.0948 found 302.0951.

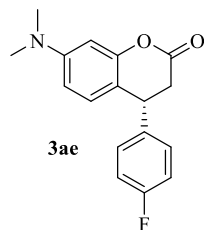

(141, experiment #)

**(R)-7-(dimethylamino)-4-(4-fluorophenyl)chroman-2-one**

49 mg, 86% yield. White solid, m.p. 88-89 °C. *R<sub>f</sub>* = 0.4 (petroleum ether/ethyl acetate 4:1). [ $\alpha$ ]<sub>D</sub><sup>25</sup> = -20.1 (*c* = 0.1 in CHCl<sub>3</sub>), 87:13 er, determined by HPLC analysis [Daicel CHIRALPAK IC column, *n*-hexane/*i*-PrOH = 90/10, 1.0 mL/min,  $\lambda$  = 254 nm, *t* (minor) = 31.3 min, *t* (major) = 29.2 min]; **<sup>1</sup>H NMR** (400 MHz, CDCl<sub>3</sub>) δ 7.12 (dd, *J* = 8.6, 5.4 Hz, 2H), 7.01 (t, *J* = 8.5 Hz, 2H), 6.80 (d, *J* = 8.2 Hz, 1H), 6.45 – 6.42 (m, 2H), 4.24 (t, *J* = 6.6 Hz, 1H), 3.04 (dd, *J* = 15.7, 6.0 Hz, 1H), 2.95 – 2.91 (m, 7H). **<sup>13</sup>C NMR** (101 MHz, CDCl<sub>3</sub>) δ 168.1, 162.1 (d, C-F, *J*<sub>C-F</sub> = 245.9 Hz), 152.6, 151.2, 137.3 (d, C-F, *J*<sub>C-F</sub> = 3.9 Hz), 129.2 (d, C-F, *J*<sub>C-F</sub> = 8.1 Hz), 128.6, 115.9 (d, C-F, *J*<sub>C-F</sub> = 21.5 Hz), 112.5, 108.8, 100.5, 40.5, 39.4, 38.0. **<sup>19</sup>F NMR** (376 MHz, CDCl<sub>3</sub>) δ -115.2. **IR** (KBr)  $\nu$  2924, 2848, 2799, 1752, 1629, 1133, 837, 803. **HRMS** (ESI) calcd for C<sub>17</sub>H<sub>17</sub>O<sub>2</sub>NF ([M+H]<sup>+</sup>) 286.1243 found 286.1249.

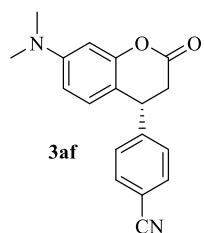

(165, experiment #)

**(R)-4-(7-(dimethylamino)-2-oxochroman-4-yl)benzotrile**

43 mg, 74% yield. White solid, m.p. 87-88 °C. *R<sub>f</sub>* = 0.2 (petroleum ether/ethyl acetate 4:1). [ $\alpha$ ]<sub>D</sub><sup>25</sup> = -38.0 (*c* = 0.1 in CHCl<sub>3</sub>), 88:12 er, determined by HPLC analysis [Daicel CHIRALPAK IA column, *n*-hexane/*i*-PrOH = 90/10, 1.0 mL/min,  $\lambda$  = 254 nm, *t* (minor) = 33.8 min, *t* (major) = 31.0 min]; **<sup>1</sup>H NMR** (400 MHz, CDCl<sub>3</sub>) δ 7.62 – 7.60 (m, 2H), 7.27 – 7.25 (m, 2H), 6.79 (d, *J* = 9.5 Hz, 1H), 6.45 – 6.43 (m, 2H), 4.31 (t, *J* = 6.3 Hz, 1H), 3.08 (dd, *J* = 15.8, 6.2 Hz, 1H), 2.98 – 2.92 (m, 7H). **<sup>13</sup>C NMR** (101 MHz, CDCl<sub>3</sub>) δ 167.4, 152.7, 151.5, 147.2, 132.9, 128.6, 128.4, 118.7, 111.4, 110.8, 108.9, 100.6, 40.4, 40.2, 37.4. **IR** (KBr)  $\nu$  2921, 2851, 2226, 1765, 1628, 1108, 831, 800. **HRMS** (ESI) calcd for C<sub>18</sub>H<sub>17</sub>O<sub>2</sub>N<sub>2</sub> ([M+H]<sup>+</sup>) 293.1290 found 293.1287.

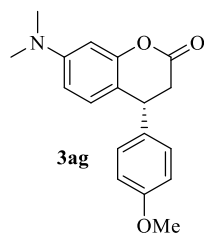

(139, experiment #)

**(R)-7-(dimethylamino)-4-(4-methoxyphenyl)chroman-2-one**

49 mg, 82% yield. White solid, m.p. 92-93 °C.  $R_f = 0.4$  (petroleum ether/ethyl acetate 4:1).  $[\alpha]_D^{25} = -20.8$  ( $c = 0.1$  in  $\text{CHCl}_3$ ), 86:14 er, determined by HPLC analysis [Daicel CHIRALPAK IA column,  $n$ -hexane/ $i$ -PrOH = 80/20, 1.0 mL/min,  $\lambda = 254$  nm,  $t$  (minor) = 11.4 min,  $t$  (major) = 9.1 min];  $^1\text{H NMR}$  (400 MHz,  $\text{CDCl}_3$ )  $\delta$  7.09 – 7.05 (m, 2H), 6.88 – 6.84 (m, 2H), 6.80 (d,  $J = 8.4$  Hz, 1H), 6.46 – 6.41 (m, 2H), 4.21 (dd,  $J = 7.8, 5.8$  Hz, 1H), 3.79 (s, 3H), 3.02 (dd,  $J = 15.7, 5.9$  Hz, 1H), 2.96 – 2.90 (m, 7H).  $^{13}\text{C NMR}$  (101 MHz,  $\text{CDCl}_3$ )  $\delta$  168.5, 158.9, 152.6, 151.1, 133.5, 128.69, 128.67, 114.4, 113.3, 108.7, 100.6, 55.4, 40.6, 39.3, 38.1. **IR** (KBr)  $\nu$  2918, 2841, 2808, 1748, 1633, 1123, 824, 801. **HRMS** (ESI) calcd for  $\text{C}_{18}\text{H}_{20}\text{O}_3\text{N}$  ( $[\text{M}+\text{H}]^+$ ) 298.1443 found 298.1444.

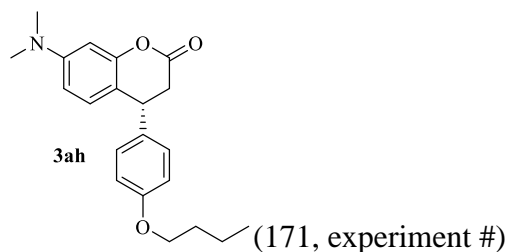

**(R)-4-(4-butoxyphenyl)-7-(dimethylamino)chroman-2-one**

61 mg, 90% yield. Colorless oil.  $R_f = 0.4$  (petroleum ether/ethyl acetate 4:1).  $[\alpha]_D^{25} = -40.7$  ( $c = 0.1$  in  $\text{CHCl}_3$ ), 81:19 er, determined by HPLC analysis [Daicel CHIRALPAK IA column,  $n$ -hexane/ $i$ -PrOH = 90/10, 1.0 mL/min,  $\lambda = 254$  nm,  $t$  (minor) = 14.9 min,  $t$  (major) = 10.7 min];  $^1\text{H NMR}$  (400 MHz,  $\text{CDCl}_3$ )  $\delta$  7.07 – 7.04 (m, 2H), 6.87 – 6.83 (m, 2H), 6.80 (d,  $J = 8.4$  Hz, 1H), 6.45 (d,  $J = 2.5$  Hz, 1H), 6.43 (dd,  $J = 8.4, 2.6$  Hz, 1H), 4.19 (t,  $J = 6.8$  Hz, 1H), 3.94 (t,  $J = 6.5$  Hz, 2H), 3.01 (dd,  $J = 15.7, 5.9$  Hz, 1H), 2.95 (s, 7H), 1.79 – 1.72 (m, 2H), 1.53 – 1.44 (m, 2H), 0.97 (t,  $J = 7.4$  Hz, 3H).  $^{13}\text{C NMR}$  (101 MHz,  $\text{CDCl}_3$ )  $\delta$  168.5, 158.5, 152.6, 151.1, 133.2, 128.7, 128.6, 115.0, 113.4, 108.7, 100.6, 67.8, 40.5, 39.3, 38.0, 31.4, 19.3, 14.0. **IR** (KBr)  $\nu$  2957, 2929, 2871, 1766, 1109, 831, 801. **HRMS** (ESI) calcd for  $\text{C}_{21}\text{H}_{26}\text{O}_3\text{N}$  ( $[\text{M}+\text{H}]^+$ ) 340.1913 found 340.1909.

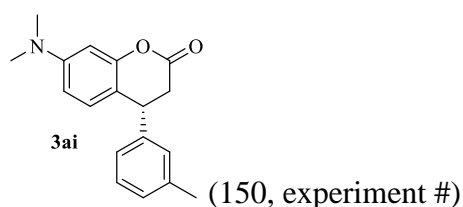

**(R)-7-(dimethylamino)-4-(m-tolyl)chroman-2-one**

40 mg, 71% yield. White solid, m.p. 93-94 °C.  $R_f = 0.4$  (petroleum ether/ethyl acetate 4:1).  $[\alpha]_D^{25} = -18.0$  ( $c = 0.1$  in  $\text{CHCl}_3$ ), 94:6 er, determined by HPLC analysis [Daicel CHIRALPAK IA column,  $n$ -hexane/ $i$ -PrOH = 90/10, 1.0 mL/min,  $\lambda = 254$  nm,  $t$  (minor) = 9.4 min,  $t$  (major) = 8.3 min];  $^1\text{H NMR}$  (400 MHz,  $\text{CDCl}_3$ )  $\delta$  7.22 (t,  $J = 7.5$  Hz, 1H), 7.08 (d,  $J = 7.5$  Hz, 1H), 6.95 (d,  $J = 8.9$  Hz, 2H), 6.81 (d,  $J = 8.4$  Hz, 1H), 6.47 (d,  $J = 2.5$  Hz, 1H), 6.44 (dd,  $J = 8.4, 2.6$  Hz, 1H), 4.21 (t,  $J = 6.8$  Hz, 1H), 3.04 (dd,  $J = 15.7, 6.0$  Hz, 1H), 2.99 – 2.92 (m, 7H), 2.33 (s, 3H).  $^{13}\text{C NMR}$  (101 MHz,  $\text{CDCl}_3$ )  $\delta$  168.4, 152.7, 151.1, 141.5, 138.7, 129.0, 128.7, 128.3, 128.2, 124.7, 113.0, 108.7, 100.6, 40.5, 40.0, 37.8, 21.6. **IR** (KBr)  $\nu$  2978, 2902, 2808, 1757, 1634, 1131, 800, 788. **HRMS** (ESI) calcd for  $\text{C}_{18}\text{H}_{20}\text{O}_2\text{N}$  ( $[\text{M}+\text{H}]^+$ ) 282.1494 found 282.1488.

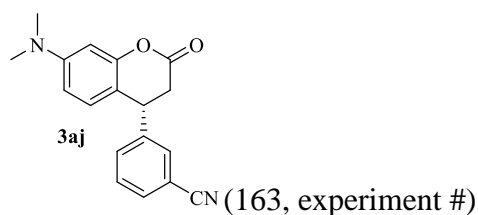

**(R)-3-(7-(dimethylamino)-2-oxochroman-4-yl)benzonitrile**

47 mg, 81% yield. White solid, m.p. 49-50 °C.  $R_f = 0.2$  (petroleum ether/ethyl acetate 4:1).  $[\alpha]_D^{25} = -14.6$  ( $c = 0.1$  in  $\text{CHCl}_3$ ), 85:15 er, determined by HPLC analysis [Daicel CHIRALPAK IA column, *n*-hexane/*i*-PrOH = 90/10, 1.0 mL/min,  $\lambda = 254$  nm,  $t$  (minor) = 22.8 min,  $t$  (major) = 24.0 min];  $^1\text{H NMR}$  (400 MHz,  $\text{CDCl}_3$ )  $\delta$  7.55 (m, 1H), 7.45 – 7.39 (m, 3H), 6.81 – 6.78 (m, 1H), 6.45 (m, 2H), 4.30 (t,  $J = 6.2$  Hz, 1H), 3.07 (dd,  $J = 15.8, 6.1$  Hz, 1H), 2.96 – 2.91 (m, 7H).  $^{13}\text{C NMR}$  (101 MHz,  $\text{CDCl}_3$ )  $\delta$  167.4, 152.7, 151.5, 143.4, 132.1, 131.19, 131.16, 129.9, 128.6, 118.6, 113.1, 110.7, 108.9, 100.6, 40.4, 39.7, 37.6. **IR** (KBr)  $\nu$  2922, 2852, 2228, 1760, 1627, 1109, 800, 690. **HRMS** (ESI) calcd for  $\text{C}_{18}\text{H}_{17}\text{O}_2\text{N}_2$  ( $[\text{M}+\text{H}]^+$ ) 293.1290 found 293.1288.

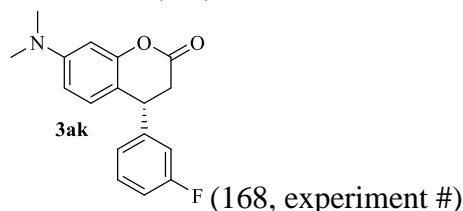

**(R)-7-(dimethylamino)-4-(3-fluorophenyl)chroman-2-one**

38 mg, 67% yield. White solid, m.p. 65-66 °C.  $R_f = 0.4$  (petroleum ether/ethyl acetate 4:1).  $[\alpha]_D^{25} = -31.2$  ( $c = 0.1$  in  $\text{CHCl}_3$ ), 91:9 er, determined by HPLC analysis [Daicel CHIRALPAK IA column, *n*-hexane/*i*-PrOH = 90/10, 1.0 mL/min,  $\lambda = 254$  nm,  $t$  (minor) = 10.8 min,  $t$  (major) = 10.0 min];  $^1\text{H NMR}$  (400 MHz,  $\text{CDCl}_3$ )  $\delta$  7.26 – 7.20 (m, 1H), 6.92 – 6.87 (m, 2H), 6.80 – 6.76 (m, 2H), 6.40 – 6.37 (m, 2H), 4.19 (t,  $J = 6.5$  Hz, 1H), 3.00 (dd,  $J = 15.8, 6.0$  Hz, 1H), 2.92 – 2.86 (m, 7H).  $^{13}\text{C NMR}$  (101 MHz,  $\text{CDCl}_3$ )  $\delta$  167.9, 163.3 (d, C-F,  $J_{\text{C-F}} = 246.9$  Hz), 152.7, 151.3, 144.3 (d, C-F,  $J_{\text{C-F}} = 6.7$  Hz), 130.7 (d, C-F,  $J_{\text{C-F}} = 8.5$  Hz), 128.7, 123.3 (d, C-F,  $J_{\text{C-F}} = 2.9$  Hz), 114.7 (q C-F,  $J_{\text{C-F}} = 21.0$  Hz), 114.4 (q, C-F,  $J_{\text{C-F}} = 20.3$  Hz), 111.9, 108.9, 100.6, 40.5, 39.9 (d, C-F,  $J_{\text{C-F}} = 1.5$  Hz), 37.7.  $^{19}\text{F NMR}$  (376 MHz,  $\text{CDCl}_3$ )  $\delta$  -112.13. **IR** (KBr)  $\nu$  2921, 2851, 2805, 1758, 1615, 1118, 817, 798. **HRMS** (ESI) calcd for  $\text{C}_{17}\text{H}_{17}\text{O}_2\text{NF}$  ( $[\text{M}+\text{H}]^+$ ) 286.1243 found 286.1242.

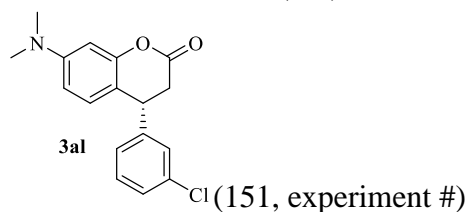

**(R)-4-(3-chlorophenyl)-7-(dimethylamino)chroman-2-one**

44 mg, 73% yield. White solid, m.p. 83-84 °C.  $R_f = 0.5$  (petroleum ether/ethyl acetate 4:1).  $[\alpha]_D^{25} = -16.4$  ( $c = 0.1$  in  $\text{CHCl}_3$ ), 90:10 er, determined by HPLC analysis [Daicel CHIRALPAK IA column, *n*-hexane/*i*-PrOH = 90/10, 1.0 mL/min,  $\lambda = 254$  nm,  $t$  (minor) = 10.6 min,  $t$  (major) = 9.9 min];  $^1\text{H NMR}$  (400 MHz,  $\text{CDCl}_3$ )  $\delta$  7.25 – 7.20 (m, 2H), 7.12 (d,  $J = 1.9$  Hz, 1H), 7.04 – 6.91 (m, 1H), 6.79 (d,  $J = 7.8$  Hz, 1H), 6.43 – 6.41 (m, 2H), 4.21 (t,  $J = 6.6$  Hz, 1H), 3.03 (dd,  $J = 15.8, 6.0$  Hz, 1H), 2.95 – 2.90 (m, 7H).  $^{13}\text{C NMR}$  (101 MHz,  $\text{CDCl}_3$ )  $\delta$  167.9, 152.7, 151.3, 143.7, 134.9, 130.4, 128.7, 127.9, 127.7, 125.8, 111.8, 108.8, 100.6, 40.5, 39.9, 37.7. **IR** (KBr)  $\nu$  2993, 2923,

2804, 1756, 1628, 1132, 807, 798. **HRMS** (ESI) calcd for  $C_{17}H_{17}O_2NCl$  ( $[M+H]^+$ ) 302.0948 found 302.0947.

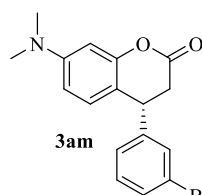

(157, experiment #)

**(R)-4-(3-bromophenyl)-7-(dimethylamino)chroman-2-one**

56 mg, 81% yield. White solid, m.p. 87-88 °C.  $R_f = 0.4$  (petroleum ether/ethyl acetate 4:1).  $[\alpha]_D^{25} = -25.3$  ( $c = 0.1$  in  $CHCl_3$ ), 89:11 er, determined by HPLC analysis [Daicel CHIRALPAK IA column, *n*-hexane/*i*-PrOH = 90/10, 1.0 mL/min,  $\lambda = 254$  nm,  $t$  (minor) = 12.1 min,  $t$  (major) = 11.1 min];  **$^1H$  NMR** (400 MHz,  $CDCl_3$ )  $\delta$  7.36 (d,  $J = 6.8$  Hz, 1H), 7.26 – 7.14 (m, 2H), 7.04 (d,  $J = 6.5$  Hz, 1H), 6.76 (d,  $J = 7.7$  Hz, 1H), 6.41 (s, 2H), 4.18 (s, 1H), 3.02 – 2.92 (m, 8H).  **$^{13}C$  NMR** (101 MHz,  $CDCl_3$ )  $\delta$  167.9, 152.7, 151.3, 144.0, 130.8, 130.7, 128.7, 126.3, 123.1, 111.8, 108.8, 100.6, 40.5, 39.8, 37.7. **IR** (KBr)  $\nu$  2920, 2849, 2811, 1754, 1627, 1131, 871, 808. **HRMS** (ESI) calcd for  $C_{17}H_{17}O_2NBr$  ( $[M+H]^+$ ) 346.0443 found 346.0448.

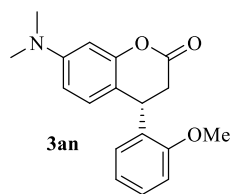

(143, experiment #)

**(R)-7-(dimethylamino)-4-(2-methoxyphenyl)chroman-2-one**

48 mg, 80% yield. White solid, m.p. 111-112 °C.  $R_f = 0.4$  (petroleum ether/ethyl acetate 4:1).  $[\alpha]_D^{25} = -33.6$  ( $c = 0.1$  in  $CHCl_3$ ), 89:11 er, determined by HPLC analysis [Daicel CHIRALPAK IC column, *n*-hexane/*i*-PrOH = 90/10, 1.0 mL/min,  $\lambda = 254$  nm,  $t$  (minor) = 34.7 min,  $t$  (major) = 37.0 min];  **$^1H$  NMR** (400 MHz,  $CDCl_3$ )  $\delta$  7.22 (m, 1H), 6.89 – 6.87 (m, 2H), 6.85 (d,  $J = 4.4$  Hz, 2H), 6.47 – 6.44 (m, 2H), 4.59 (t,  $J = 5.8$  Hz, 1H), 3.84 (s, 3H), 3.06 (dd,  $J = 16.0, 4.9$  Hz, 1H), 3.00 – 2.96 (m, 7H).  **$^{13}C$  NMR** (101 MHz,  $CDCl_3$ )  $\delta$  168.8, 156.9, 153.1, 151.0, 130.0, 128.9, 128.5, 128.3, 120.9, 112.0, 110.6, 108.9, 100.5, 55.2, 40.6, 35.9, 34.7. **IR** (KBr)  $\nu$  2917, 2836, 2801, 1765, 1624, 1130, 811, 765. **HRMS** (ESI) calcd for  $C_{18}H_{20}O_3N$  ( $[M+H]^+$ ) 298.1443 found 298.1445.

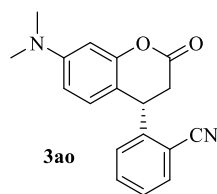

(162, experiment #)

**(R)-2-(7-(dimethylamino)-2-oxochroman-4-yl)benzonitrile**

53 mg, 90% yield. White solid, m.p. 98-99 °C.  $R_f = 0.2$  (petroleum ether/ethyl acetate 4:1).  $[\alpha]_D^{25} = -29.2$  ( $c = 0.1$  in  $CHCl_3$ ), 73:27 er, determined by HPLC analysis [Daicel CHIRALPAK IA column, *n*-hexane/*i*-PrOH = 90/10, 1.0 mL/min,  $\lambda = 254$  nm,  $t$  (minor) = 17.7 min,  $t$  (major) = 15.5 min];  **$^1H$  NMR** (400 MHz,  $CDCl_3$ )  $\delta$  7.70 (d,  $J = 7.2$  Hz, 1H), 7.49 (t,  $J = 7.3$  Hz, 1H), 7.36 (t,  $J = 7.5$  Hz, 1H), 7.05 (d,  $J = 7.9$  Hz, 1H), 6.89 (d,  $J = 8.4$  Hz, 1H), 6.47 – 6.45 (m, 2H), 4.73 (t,  $J = 5.7$  Hz, 1H), 3.16 (dd,  $J = 16.0, 6.5$  Hz, 1H), 3.03 (dd,  $J = 16.0, 5.0$  Hz, 1H), 2.97 (s, 6H).  **$^{13}C$  NMR** (101 MHz,  $CDCl_3$ )  $\delta$  167.3, 153.0, 151.6, 145.8, 133.7, 133.6, 128.8, 128.03, 127.98, 117.7,

111.9, 110.1, 109.1, 100.5, 40.5, 38.5, 37.1. **IR** (KBr)  $\nu$  2917, 2851, 2810, 2221, 1744, 1628, 1156, 803, 765. **HRMS** (ESI) calcd for C<sub>18</sub>H<sub>17</sub>O<sub>2</sub>N<sub>2</sub> ([M+H]<sup>+</sup>) 293.1290 found 293.1293.

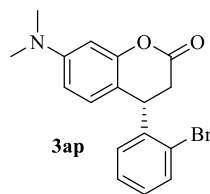

(158, experiment #)

#### (S)-4-(2-bromophenyl)-7-(dimethylamino)chroman-2-one

40 mg, 58% yield. White solid, m.p. 116-117 °C.  $R_f$  = 0.4 (petroleum ether/ethyl acetate 4:1).  $[\alpha]_D^{25}$  = -43.6 (c = 0.1 in CHCl<sub>3</sub>), 84:16 er, determined by HPLC analysis [Daicel CHIRALPAK IA column, *n*-hexane/*i*-PrOH = 90/10, 1.0 mL/min,  $\lambda$  = 254 nm, t (minor) = 9.7 min, t (major) = 8.7 min]; **<sup>1</sup>H NMR** (400 MHz, CDCl<sub>3</sub>)  $\delta$  7.60 (d,  $J$  = 7.8 Hz, 1H), 7.20 (t,  $J$  = 7.4 Hz, 1H), 7.11 (t,  $J$  = 7.1 Hz, 1H), 6.88 (t,  $J$  = 8.6 Hz, 2H), 6.47 (d,  $J$  = 10.9 Hz, 2H), 4.75 (t,  $J$  = 5.9 Hz, 1H), 3.03 (d,  $J$  = 6.0 Hz, 2H), 2.97 (s, 6H). **<sup>13</sup>C NMR** (101 MHz, CDCl<sub>3</sub>)  $\delta$  167.9, 153.2, 151.4, 140.6, 133.4, 129.0, 128.9, 128.3, 124.2, 111.3, 109.0, 100.5, 40.5, 39.4, 36.4. **IR** (KBr)  $\nu$  2921, 2850, 2804, 1770, 1625, 1132, 807, 763. **HRMS** (ESI) calcd for C<sub>17</sub>H<sub>17</sub>O<sub>2</sub>NBr ([M+H]<sup>+</sup>) 346.0443 found 346.0445.

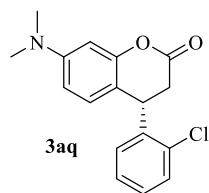

(152, experiment #)

#### (S)-4-(2-chlorophenyl)-7-(dimethylamino)chroman-2-one

56 mg, 93% yield. White solid, m.p. 110-111 °C.  $R_f$  = 0.5 (petroleum ether/ethyl acetate 4:1).  $[\alpha]_D^{25}$  = -48.4 (c = 0.1 in CHCl<sub>3</sub>), 89:11 er, determined by HPLC analysis [Daicel CHIRALPAK IA column, *n*-hexane/*i*-PrOH = 90/10, 1.0 mL/min,  $\lambda$  = 254 nm, t (minor) = 9.2 min, t (major) = 8.2 min]; **<sup>1</sup>H NMR** (400 MHz, CDCl<sub>3</sub>)  $\delta$  7.41 (dd,  $J$  = 7.6, 1.7 Hz, 1H), 7.21 – 7.10 (m, 2H), 6.95 – 6.70 (m, 2H), 6.59 – 6.41 (m, 2H), 4.76 (t,  $J$  = 5.9 Hz, 1H), 3.04 (d,  $J$  = 6.1 Hz, 2H), 2.97 (s, 6H). **<sup>13</sup>C NMR** (101 MHz, CDCl<sub>3</sub>)  $\delta$  168.0, 153.3, 151.4, 139.0, 133.6, 130.1, 128.9, 128.80, 128.75, 127.6, 111.2, 109.0, 100.5, 40.5, 36.9, 36.2. **IR** (KBr)  $\nu$  2921, 2849, 2809, 1773, 1625, 1132, 808, 765. **HRMS** (ESI) calcd for C<sub>17</sub>H<sub>17</sub>O<sub>2</sub>NCl ([M+H]<sup>+</sup>) 302.0948 found 302.0943.

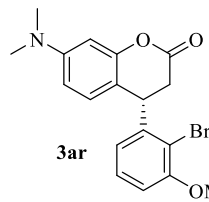

(144, experiment #)

#### (S)-4-(2-bromo-3-methoxyphenyl)-7-(dimethylamino)chroman-2-one

50 mg, 66% yield. White solid, m.p. 105-106 °C.  $R_f$  = 0.3 (petroleum ether/ethyl acetate 4:1).  $[\alpha]_D^{25}$  = -21.1 (c = 0.1 in CHCl<sub>3</sub>), 92:8 er, determined by HPLC analysis [Daicel CHIRALPAK IC column, *n*-hexane/*i*-PrOH = 90/10, 1.0 mL/min,  $\lambda$  = 254 nm, t (minor) = 30.2 min, t (major) = 24.4 min]; **<sup>1</sup>H NMR** (400 MHz, CDCl<sub>3</sub>)  $\delta$  7.48 (d,  $J$  = 8.8 Hz, 1H), 6.87 (d,  $J$  = 8.0 Hz, 1H), 6.67 (dd,  $J$  = 8.8, 3.0 Hz, 1H), 6.54 – 6.38 (m, 3H), 4.68 (t,  $J$  = 6.0 Hz, 1H), 3.66 (s, 3H), 3.02 – 3.00 (m, 2H), 2.96 (s, 6H). **<sup>13</sup>C NMR** (101 MHz, CDCl<sub>3</sub>)  $\delta$  167.9, 159.5, 153.1, 151.4, 141.6, 133.9, 128.9, 115.2, 114.4, 114.1, 111.0, 109.0, 100.5, 55.5, 40.5, 39.5, 36.3. **IR** (KBr)  $\nu$  2919, 2841,



2812, 1761, 1633, 1141, 808, 795. **HRMS** (ESI) calcd for C<sub>18</sub>H<sub>19</sub>O<sub>3</sub>Br ([M+H]<sup>+</sup>) 376.0548 found 376.0550.

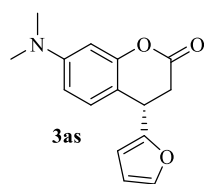

(153, experiment #)

**(S)-7-(dimethylamino)-4-(furan-2-yl)chroman-2-one**

31 mg, 61% yield. White solid, m.p. 93-94 °C.  $R_f = 0.5$  (petroleum ether/ethyl acetate 4:1).  $[\alpha]_D^{25} = -20.0$  (c = 0.1 in CHCl<sub>3</sub>), 87:13 er, determined by HPLC analysis [Daicel CHIRALPAK IA column, *n*-hexane/*i*-PrOH = 90/10, 1.0 mL/min,  $\lambda = 254$  nm, t (minor) = 11.9 min, t (major) = 9.4 min]; **<sup>1</sup>H NMR** (400 MHz, CDCl<sub>3</sub>)  $\delta$  7.34 (dd,  $J = 1.9, 0.8$  Hz, 1H), 6.99 (d,  $J = 8.5$  Hz, 1H), 6.46 (dd,  $J = 8.5, 2.6$  Hz, 1H), 6.41 (d,  $J = 2.6$  Hz, 1H), 6.27 (dd,  $J = 3.3, 1.9$  Hz, 1H), 6.00 (d,  $J = 3.3$  Hz, 1H), 4.29 (t,  $J = 5.8$  Hz, 1H), 3.15 (dd,  $J = 15.9, 5.5$  Hz, 1H), 2.97 – 2.94 (m, 7H). **<sup>13</sup>C NMR** (101 MHz, CDCl<sub>3</sub>)  $\delta$  168.0, 154.2, 152.4, 151.4, 142.5, 128.5, 110.4, 110.4, 108.7, 106.6, 100.7, 40.5, 34.7, 34.1. **IR** (KBr)  $\nu$  2921, 2359, 2341, 1750, 1635, 1134, 1119, 801, 748. **HRMS** (ESI) calcd for C<sub>15</sub>H<sub>16</sub>O<sub>3</sub>N ([M+H]<sup>+</sup>) 258.1130 found 258.1129.

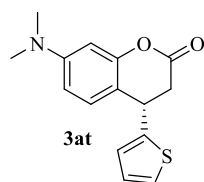

(155, experiment #)

**(S)-7-(dimethylamino)-4-(thiophen-2-yl)chroman-2-one**

35 mg, 64% yield. White solid, m.p. 86-87 °C.  $R_f = 0.4$  (petroleum ether/ethyl acetate 4:1).  $[\alpha]_D^{25} = -25.1$  (c = 0.1 in CHCl<sub>3</sub>), 88:12 er, determined by HPLC analysis [Daicel CHIRALPAK IA column, *n*-hexane/*i*-PrOH = 90/10, 1.0 mL/min,  $\lambda = 254$  nm, t (minor) = 15.0 min, t (major) = 10.8 min]; **<sup>1</sup>H NMR** (400 MHz, CDCl<sub>3</sub>)  $\delta$  7.20 (dd,  $J = 5.1, 1.2$  Hz, 1H), 6.99 (d,  $J = 8.5$  Hz, 1H), 6.93 (dd,  $J = 5.1, 3.5$  Hz, 1H), 6.81 – 6.80 (m, 1H), 6.47 (dd,  $J = 8.4, 2.6$  Hz, 1H), 6.43 (d,  $J = 2.5$  Hz, 1H), 4.51 (t,  $J = 6.0$  Hz, 1H), 3.09 (d,  $J = 6.0$  Hz, 2H), 2.96 (s, 6H). **<sup>13</sup>C NMR** (101 MHz, CDCl<sub>3</sub>)  $\delta$  167.8, 152.3, 151.4, 145.3, 128.5, 127.2, 125.0, 124.9, 112.6, 108.7, 100.6, 40.5, 38.3, 35.6. **IR** (KBr)  $\nu$  3087, 2904, 2808, 1751, 1635, 1119, 824, 707. **HRMS** (ESI) calcd for C<sub>15</sub>H<sub>16</sub>O<sub>2</sub>NS ([M+H]<sup>+</sup>) 274.0902 found 274.0899.

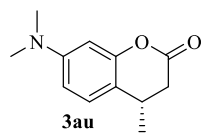

(169, experiment #)

**(S)-7-(dimethylamino)-4-methylchroman-2-one**

26 mg, 64% yield. Colorless oil.  $R_f = 0.5$  (petroleum ether/ethyl acetate 4:1).  $[\alpha]_D^{25} = -12.6$  (c = 0.1 in CHCl<sub>3</sub>), 90:10 er, determined by HPLC analysis [Daicel CHIRALPAK IA column, *n*-hexane/*i*-PrOH = 99/1, 0.8 mL/min,  $\lambda = 254$  nm, t (minor) = 17.3 min, t (major) = 16.4 min]; **<sup>1</sup>H NMR** (400 MHz, CDCl<sub>3</sub>)  $\delta$  7.7 – 7.05 (m, 1H), 6.48 (dd,  $J = 8.5, 2.6$  Hz, 1H), 6.40 (d,  $J = 2.6$  Hz, 1H), 3.13 – 3.04 (m, 1H), 2.93 (s, 6H), 2.80 (dd,  $J = 15.7, 5.4$  Hz, 1H), 2.51 (dd,  $J = 15.7, 7.6$  Hz, 1H), 1.30 – 1.28 (m, 3H). **<sup>13</sup>C NMR** (101 MHz, CDCl<sub>3</sub>)  $\delta$  169.1, 152.2, 150.9, 126.8, 115.3, 108.7,

100.9, 40.6, 37.6, 28.7, 20.3. **IR** (KBr)  $\nu$  2958, 2922, 2805, 1769, 1629, 1121, 827, 799. **HRMS** (ESI) calcd for  $C_{12}H_{16}O_2N([M+H]^+)$  206.1181 found 206.1180.

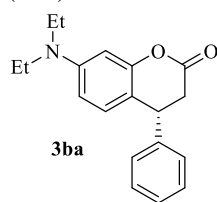

(167, experiment #)

**(R)-7-(diethylamino)-4-phenylchroman-2-one**

44 mg, 74% yield. Colorless oil.  $R_f = 0.6$  (petroleum ether/ethyl acetate 4:1).  $[\alpha]_D^{25} = -29.3$  ( $c = 0.1$  in  $CHCl_3$ ), 86:14 er, determined by HPLC analysis [Daicel CHIRALPAK IA column, *n*-hexane/*i*-PrOH = 90/10, 1.0 mL/min,  $\lambda = 254$  nm,  $t$  (minor) = 7.7 min,  $t$  (major) = 7.2 min];  **$^1H$  NMR** (400 MHz,  $CDCl_3$ )  $\delta$  7.33 – 7.28 (m, 2H), 7.27 – 7.22 (m, 1H), 7.17 – 7.15 (m, 2H), 6.75 (d,  $J = 8.5$  Hz, 1H), 6.40 (d,  $J = 2.6$  Hz, 1H), 6.36 (dd,  $J = 8.5, 2.6$  Hz, 1H), 4.22 (t,  $J = 6.8$  Hz, 1H), 3.32 (q,  $J = 7.1$  Hz, 4H), 3.06 – 2.91 (m, 2H), 1.15 (t,  $J = 7.1$  Hz, 6H).  **$^{13}C$  NMR** (101 MHz,  $CDCl_3$ )  $\delta$  168.5, 153.0, 148.4, 141.7, 129.0, 128.9, 127.7, 127.4, 111.7, 108.0, 99.7, 44.6, 40.1, 37.9, 12.6. **IR** (KBr)  $\nu$  3027, 2970, 2927, 1765, 1627, 1114, 801, 699. **HRMS** (ESI) calcd for  $C_{19}H_{22}O_2N([M+H]^+)$  296.1651 found 296.1650.

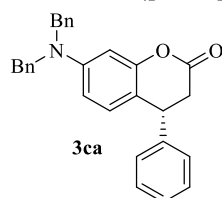

(166, experiment #)

**(R)-7-(dibenzylamino)-4-phenylchroman-2-one**

36 mg, 43% yield. White solid, m.p. 51-52 °C.  $R_f = 0.5$  (petroleum ether/ethyl acetate 4:1).  $[\alpha]_D^{25} = -24.7$  ( $c = 0.1$  in  $CHCl_3$ ), 90:10 er, determined by HPLC analysis [Daicel CHIRALPAK IA column, *n*-hexane/*i*-PrOH = 90/10, 1.0 mL/min,  $\lambda = 254$  nm,  $t$  (minor) = 13.9 min,  $t$  (major) = 12.0 min];  **$^1H$  NMR** (400 MHz,  $CDCl_3$ )  $\delta$  7.39 – 7.34 (m, 6H), 7.32 – 7.26 (m, 7H), 7.21 – 7.18 (m, 2H), 6.73 (d,  $J = 8.6$  Hz, 1H), 6.52 (d,  $J = 2.6$  Hz, 1H), 6.47 (dd,  $J = 8.5, 2.7$  Hz, 1H), 4.69 (s, 4H), 4.26 – 4.23 (m, 1H), 3.02 (qd,  $J = 15.8, 7.0$  Hz, 2H).  **$^{13}C$  NMR** (101 MHz,  $CDCl_3$ )  $\delta$  168.3, 152.7, 149.8, 141.3, 138.0, 129.1, 128.9, 128.8, 127.7, 127.5, 127.2, 126.6, 113.5, 108.8, 100.8, 54.6, 40.1, 37.6. **IR** (KBr)  $\nu$  3026, 2918, 2849, 1763, 1626, 1116, 801, 695. **HRMS** (ESI) calcd for  $C_{29}H_{26}O_2N([M+H]^+)$  420.1964 found 420.1963.

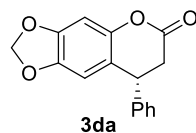

(806, experiment #)

**(R)-9-phenyl-8,9-dihydro-7H-[1,3]dioxolo[4,5-f]chromen-7-one**

29.1 mg, 54% yield. White solid, m.p. 81-82 °C.  $R_f = 0.4$  (petroleum ether/ethyl acetate 4:1).  $[\alpha]_D^{25} = -14.0$  ( $c = 0.1$  in  $CHCl_3$ ), 91:9 er, determined by HPLC analysis [Daicel CHIRALPAK IC column, *n*-hexane/*i*-PrOH = 70/30, 1.0 mL/min,  $\lambda = 277$  nm,  $t$  (minor) = 13.9 min,  $t$  (major) = 15.2 min];  **$^1H$  NMR** (400 MHz,  $CDCl_3$ )  $\delta$  7.37 – 7.33 (m, 2H), 7.31 – 7.29 (m, 1H), 7.14 (d,  $J = 7.2$  Hz, 2H), 6.66 (s, 1H), 6.39 (s, 1H), 5.95 (d,  $J = 1.9$  Hz, 2H), 4.22 (t,  $J = 6.7$  Hz, 1H), 3.07 – 2.93 (m, 2H).  **$^{13}C$  NMR** (101 MHz,  $CDCl_3$ )  $\delta$  167.75, 147.67, 146.36, 144.57, 140.58, 129.30,

127.85, 127.62, 118.07, 107.44, 101.86, 99.29, 40.79, 37.15. **IR** (KBr)  $\nu$  3395, 2923, 2851, 1760, 1647, 1149, 802, 703. **HRMS** (ESI) calcd for C<sub>16</sub>H<sub>13</sub>O<sub>4</sub> ([M+H]<sup>+</sup>) 269.0814 found 269.0804.

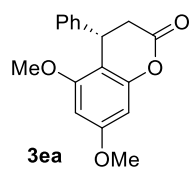

(804, experiment #)

### (S)-5,7-dimethoxy-4-phenylchroman-2-one<sup>3</sup>

22.3 mg, 39% yield. White solid, m.p. 117-118 °C.  $R_f$  = 0.5 (petroleum ether/ethyl acetate 4:1).  $[\alpha]_D^{25}$  = -21.0 (c = 0.1 in CHCl<sub>3</sub>), 82:18 er, determined by HPLC analysis [Daicel CHIRALPAK OD-H column, *n*-hexane/*i*-PrOH = 90/10, 1.0 mL/min,  $\lambda$  = 254 nm, t (minor) = 10.4 min, t (major) = 23.3 min]; <sup>1</sup>H NMR (400 MHz, CDCl<sub>3</sub>)  $\delta$  7.28 – 7.27 (m, 1H), 7.25 – 7.24 (m, 1H), 7.22 – 7.20 (m, 1H), 7.12 – 7.10 (m, 2H), 6.32 (dd,  $J$  = 21.0, 2.3 Hz, 2H), 4.55 (t,  $J$  = 4.4 Hz, 1H), 3.82 (s, 3H), 3.74 (s, 3H), 3.01 (d,  $J$  = 4.5 Hz, 2H). <sup>13</sup>C NMR (101 MHz, CDCl<sub>3</sub>)  $\delta$  167.80, 160.81, 157.57, 153.25, 141.68, 128.97, 127.24, 126.88, 106.16, 95.25, 94.06, 55.94, 55.71, 37.22, 34.63. **IR** (KBr)  $\nu$  3031, 2923, 2851, 1773, 1623, 1130, 810, 706. **HRMS** (ESI) calcd for C<sub>17</sub>H<sub>17</sub>O<sub>4</sub> ([M+H]<sup>+</sup>) 285.1127 found 285.1131.

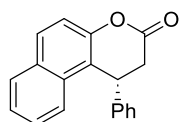

(805, experiment #)

### (R)-1-phenyl-1,2-dihydro-3H-benzo[f]chromen-3-one

44.8 mg, 82% yield. White solid, m.p. 115-116 °C.  $R_f$  = 0.4 (petroleum ether/ethyl acetate 4:1).  $[\alpha]_D^{25}$  = -38.0 (c = 0.1 in CHCl<sub>3</sub>), 86:14 er, determined by HPLC analysis [Daicel CHIRALPAK IC column, *n*-hexane/*i*-PrOH = 70/30, 1.0 mL/min,  $\lambda$  = 277 nm, t (minor) = 10.3 min, t (major) = 9.2 min]; <sup>1</sup>H NMR (400 MHz, CDCl<sub>3</sub>)  $\delta$  7.89 – 7.86 (m, 2H), 7.79 (d,  $J$  = 8.1 Hz, 1H), 7.50 – 7.42 (m, 2H), 7.35 (d,  $J$  = 8.9 Hz, 1H), 7.29 – 7.27 (m, 1H), 7.26 – 7.25 (m, 1H), 7.23 – 7.19 (m, 1H), 7.14 – 7.12 (m, 2H), 4.95 (dd,  $J$  = 6.7, 2.3 Hz, 1H), 3.26 – 3.14 (m, 2H). <sup>13</sup>C NMR (101 MHz, CDCl<sub>3</sub>)  $\delta$  167.25, 149.91, 140.64, 131.21, 131.11, 130.05, 129.35, 128.87, 127.71, 127.58, 127.05, 125.38, 123.17, 117.71, 117.67, 37.76, 37.59. **IR** (KBr)  $\nu$  3026, 2924, 2851, 1761, 1625, 1136, 814, 702. **HRMS** (ESI) calcd for C<sub>19</sub>H<sub>14</sub>O<sub>2</sub>Na ([M+Na]<sup>+</sup>) 297.0891 found 297.0892.

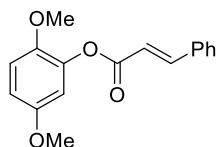

(802, experiment #)

### 2,5-dimethoxyphenyl cinnamate

15.4 mg, 48% yield. White solid,  $R_f$  = 0.4 (petroleum ether/ethyl acetate 4:1). <sup>1</sup>H NMR (400 MHz, CDCl<sub>3</sub>)  $\delta$  7.89 (d,  $J$  = 16.0 Hz, 1H), 7.60 – 7.58 (m, 2H), 7.43 – 7.41 (m, 3H), 6.94 (d,  $J$  = 8.9 Hz, 1H), 6.78 – 6.73 (m, 2H), 6.67 (d,  $J$  = 16.0 Hz, 1H), 3.79 (d,  $J$  = 10.4 Hz, 6H). <sup>13</sup>C NMR (101 MHz, CDCl<sub>3</sub>)  $\delta$  165.02, 153.90, 146.80, 145.61, 140.41, 134.37, 130.78, 129.10, 128.45, 117.05, 113.57, 111.62, 109.66, 56.73, 55.94.

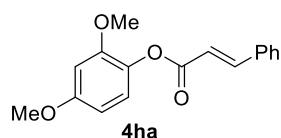

(803, experiment #)

### 2,4-dimethoxyphenyl cinnamate

50.0 mg, 88% yield. White solid, m.p.  $R_f = 0.3$  (petroleum ether/ethyl acetate 4:1).  $^1\text{H NMR}$  (400 MHz, Chloroform-*d*)  $\delta$  7.88 (d,  $J = 16.0$  Hz, 1H), 7.60 – 7.58 (m, 2H), 7.42 – 7.41 (m, 3H), 7.03 (d,  $J = 8.7$  Hz, 1H), 6.67 (d,  $J = 16.0$  Hz, 1H), 6.58 (d,  $J = 2.6$  Hz, 1H), 6.48 (dd,  $J = 8.7, 2.7$  Hz, 1H), 3.82 (d,  $J = 2.3$  Hz, 6H).  $^{13}\text{C NMR}$  (101 MHz,  $\text{CDCl}_3$ )  $\delta$  165.50, 158.51, 151.97, 146.48, 134.39, 133.66, 130.66, 129.04, 128.38, 122.99, 117.19, 104.02, 100.34, 55.98, 55.71.

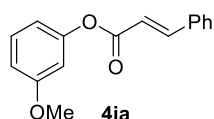

(808, experiment #)

### 3-methoxyphenyl cinnamate

21.5 mg, 42% yield. White solid,  $R_f = 0.6$  (petroleum ether/ethyl acetate 4:1).  $^1\text{H NMR}$  (400 MHz,  $\text{CDCl}_3$ )  $\delta$  7.88 (d,  $J = 16.1$  Hz, 1H), 7.61 – 7.58 (m, 2H), 7.44 – 7.42 (m, 3H), 7.31 (t,  $J = 8.2$  Hz, 1H), 6.82 – 6.79 (m, 2H), 6.74 (t,  $J = 2.3$  Hz, 1H), 6.63 (d,  $J = 16.0$  Hz, 1H), 3.82 (s, 3H).  $^{13}\text{C NMR}$  (101 MHz,  $\text{CDCl}_3$ )  $\delta$  187.16, 165.43, 160.67, 151.93, 149.15, 146.75, 134.33, 131.70, 131.08, 130.85, 129.96, 129.14, 128.90, 128.44, 117.44, 113.99, 111.87, 107.77, 55.57.

## 3. Product Transformation

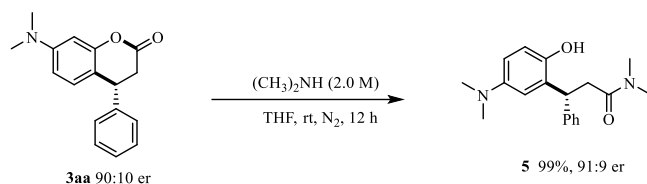

To a 10 mL Schlenk tube,  $(\text{CH}_3)_2\text{NH}$  (2.0 M, 10.0 equiv.) was added to a mixture of **3aa** (0.2 mmol) in THF (4.0 mL) under a nitrogen atmosphere. After the reaction mixture was stirred at room temperature for 12 h, the reaction was complete (monitored by TLC), the mixture was concentrated to dryness. The residue was purified by flash column chromatography to afford the desired product **5** (petroleum ether : ethyl acetate = 6 : 1).

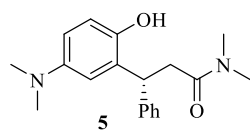

(174, experiment #)

### (*R*)-3-(5-(dimethylamino)-2-hydroxyphenyl)-*N,N*-dimethyl-3-phenylpropanamide

62 mg, 99% yield. White solid, m.p. 151-152 °C.  $R_f = 0.1$  (petroleum ether/ethyl acetate 2:1).  $[\alpha]_D^{25} = -38.0$  ( $c = 0.1$  in  $\text{CHCl}_3$ ), 91:9 er, determined by HPLC analysis [Daicel CHIRALPAK IA column, *n*-hexane/*i*-PrOH = 90/10, 1.0 mL/min,  $\lambda = 254$  nm,  $t$  (minor) = 30.2 min,  $t$  (major) = 27.1 min];  $^1\text{H NMR}$  (400 MHz,  $\text{CDCl}_3$ )  $\delta$  7.30 – 7.29 (m, 4H), 7.21 – 7.17 (m, 1H), 6.68 (d,  $J =$

8.6 Hz, 1H), 6.36 (d,  $J = 2.7$  Hz, 1H), 6.18 (dd,  $J = 8.6, 2.7$  Hz, 1H), 4.89 (dd,  $J = 8.1, 5.3$  Hz, 1H), 3.12 – 3.10 (m, 2H), 3.01 (s, 3H), 2.94 (s, 3H), 2.86 (s, 6H).  $^{13}\text{C}$  NMR (101 MHz,  $\text{CDCl}_3$ )  $\delta$  173.1, 155.3, 150.4, 145.1, 129.4, 128.5, 128.1, 126.2, 120.8, 105.8, 102.3, 40.6, 40.1, 37.7, 37.3, 36.1.

#### 4. X-Ray Crystal Structure of Enantiopure **3ac**

The crystal of **3ac** (CCDC 2342120) suitable for X-ray analysis was prepared by slow evaporation of the solvent of the solution of **3ac** in *n*-hexane/acetone at room temperature (Figure S1).

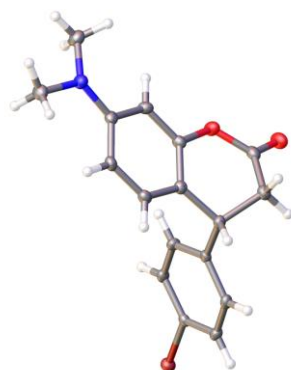

Figure S1. X-ray crystal structure of **3ac**

Table S1. Crystal data and structure refinement for **3ac**

|                                               |                                           |
|-----------------------------------------------|-------------------------------------------|
| Identification code                           | MX10532                                   |
| Empirical formula                             | $\text{C}_{17}\text{H}_{16}\text{BrNO}_2$ |
| Formula weight                                | 346.22                                    |
| Temperature/K                                 | 170.00(10)                                |
| Crystal system                                | orthorhombic                              |
| Space group                                   | $P2_12_12_1$                              |
| $a/\text{\AA}$                                | 5.7063(4)                                 |
| $b/\text{\AA}$                                | 7.9223(4)                                 |
| $c/\text{\AA}$                                | 32.7085(16)                               |
| $\alpha/^\circ$                               | 90                                        |
| $\beta/^\circ$                                | 90                                        |
| $\gamma/^\circ$                               | 90                                        |
| Volume/ $\text{\AA}^3$                        | 1478.65(15)                               |
| Z                                             | 4                                         |
| $\rho_{\text{calc}}/\text{cm}^3$              | 1.555                                     |
| $\mu/\text{mm}^{-1}$                          | 2.784                                     |
| F(000)                                        | 704.0                                     |
| Crystal size/ $\text{mm}^3$                   | $0.28 \times 0.04 \times 0.03$            |
| Radiation                                     | Mo $K\alpha$ ( $\lambda = 0.71073$ )      |
| $2\theta$ range for data collection/ $^\circ$ | 4.982 to 61.38                            |

|                                             |                                                               |
|---------------------------------------------|---------------------------------------------------------------|
| Index ranges                                | -7 ≤ h ≤ 8, -11 ≤ k ≤ 10, -44 ≤ l ≤ 43                        |
| Reflections collected                       | 16468                                                         |
| Independent reflections                     | 4006 [R <sub>int</sub> = 0.0444, R <sub>sigma</sub> = 0.0457] |
| Data/restraints/parameters                  | 4006/0/192                                                    |
| Goodness-of-fit on F <sup>2</sup>           | 1.040                                                         |
| Final R indexes [I ≥ 2σ(I)]                 | R <sub>1</sub> = 0.0406, wR <sub>2</sub> = 0.0789             |
| Final R indexes [all data]                  | R <sub>1</sub> = 0.0540, wR <sub>2</sub> = 0.0825             |
| Largest diff. peak/hole / e Å <sup>-3</sup> | 0.97/-0.55                                                    |
| Flack parameter                             | -0.004(6)                                                     |

---

## 5. Reference

- [1] (a) H. Byeon, S. Ryu, E. J. Yoob and J. W. Yang., *Adv. Synth. Catal.*, **2021**, 363, 5085. (b) L.-L. Shang, Y. F. X. -L. Gao, Z.-R. Chen, Y. Xia, W.-W. Jin and C. -J. Liu., *Chin. J. Chem.*, **2020**, 38, 1595.
- [2] (a) C.-G. Zhao, F.-Y. Li and J. W., *Angew. Chem. Int. Ed.*, **2016**, 128, 1852. (b) S. Kobayashi, T. Kinoshita, H. Uehara, T. Sudo and I. Ryu., *Org. Lett.*, **2009**, 11, 3934. (c) C. D. Campbell, C. Concellon and A. D. Smith, *Tetrahedron. Asymmetry*, **2011**, 22, 797.
- [3] G.-T. Li, Z.-K. Li, Q. Gu and S.-L. You, *Org. Lett.*, **2017**, 19, 1318.

## 6. <sup>1</sup>H, <sup>19</sup>F, <sup>13</sup>C NMR Spectra

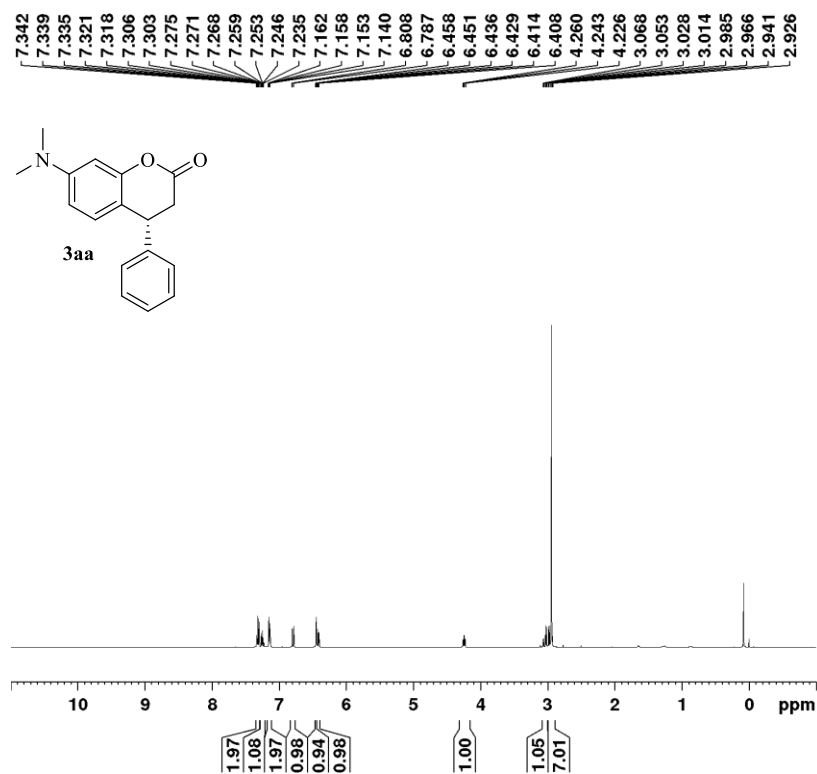

Current Data Parameters  
 NAME gyy-sq  
 EXPNO 8  
 PROCNO 1

F2 - Acquisition Parameters  
 Date\_ 20211213  
 Time 17.44  
 INSTRUM spect  
 PROBHD 5 mm PABBO BB/  
 PULPROG zg30  
 TD 65536  
 SOLVENT CDCl3  
 NS 6  
 DS 2  
 SWH 8012.820 Hz  
 FIDRES 0.122265 Hz  
 AQ 4.0894465 sec  
 RG 31.77  
 DW 62.400 usec  
 DE 6.50 usec  
 TE 293.2 K  
 D1 1.00000000 sec  
 D11 0 sec  
 TD0 1

===== CHANNEL f1 =====  
 SFO1 400.1324710 MHz  
 NUC1 1H  
 P1 9.63 usec  
 PLW1 16.00000000 W

===== CHANNEL f2 =====  
 SFO2 400.1324710 MHz  
 NUC2 off  
 CPDPRG[2]  
 PCPD2 0 usec  
 PLW2 0 W  
 PLW12 0 W  
 PLW13 0 W

F2 - Processing parameters  
 SI 65536  
 SF 400.1300149 MHz  
 WDW EM  
 SSB 0  
 LB 0.30 Hz  
 GB 0  
 PC 1.00

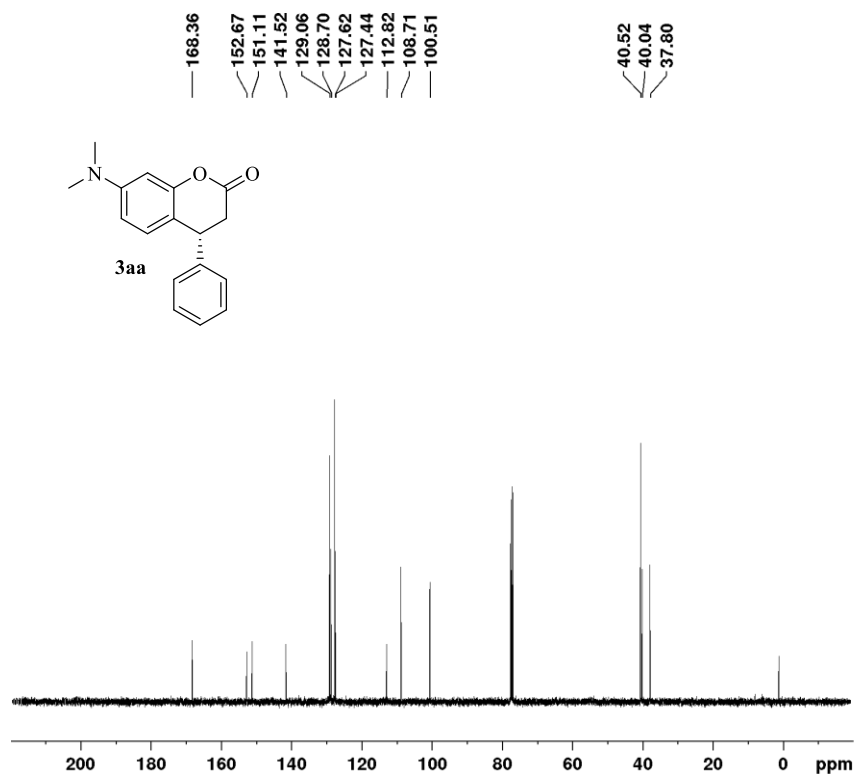

Current Data Parameters  
 NAME gyy-sq  
 EXPNO 9  
 PROCNO 1

F2 - Acquisition Parameters  
 Date\_ 20211213  
 Time 17.45  
 INSTRUM spect  
 PROBHD 5 mm PABBO BB/  
 PULPROG zgpg30  
 TD 65536  
 SOLVENT CDCl3  
 NS 36  
 DS 4  
 SWH 24038.461 Hz  
 FIDRES 0.366798 Hz  
 AQ 1.3631488 sec  
 RG 213.76  
 DW 20.800 usec  
 DE 6.50 usec  
 TE 293.4 K  
 D1 2.00000000 sec  
 D11 0.03000000 sec  
 TD0 1

===== CHANNEL f1 =====  
 SFO1 100.6228293 MHz  
 NUC1 13C  
 P1 10.15 usec  
 PLW1 76.00000000 W

===== CHANNEL f2 =====  
 SFO2 400.1316005 MHz  
 NUC2 1H  
 CPDPRG[2] waitz16  
 PCPD2 80.00 usec  
 PLW2 16.00000000 W  
 PLW12 0.23184000 W  
 PLW13 0.14838000 W

F2 - Processing parameters  
 SI 32768  
 SF 100.6127633 MHz  
 WDW EM  
 SSB 0  
 LB 1.00 Hz  
 GB 0  
 PC 1.40

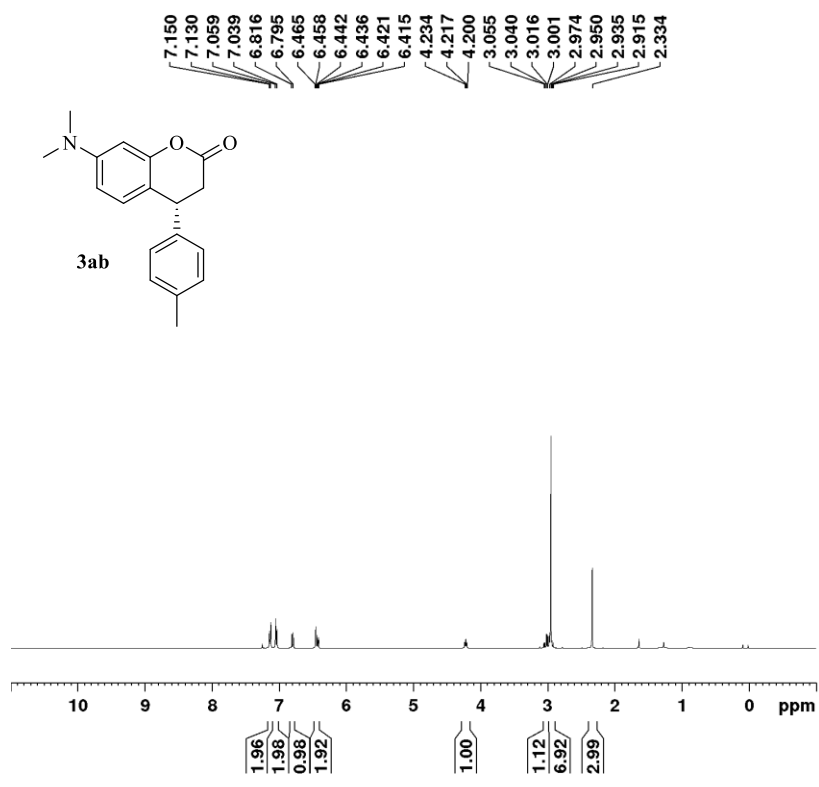

```

Current Data Parameters
NAME          GYV
EXPNO         51
PROCNO        1

F2 - Acquisition Parameters
Date_         20220622
Time          19.45
INSTRUM      spect
PROBHD       5 mm PABBO BB/
PULPROG      zg30
TD            65536
SOLVENT      CDCl3
NS            4
DS            2
SWH           8012.820 Hz
FIDRES        0.122266 Hz
AQ            4.0894465 sec
RG            58.51
DW            62.400 usec
DE            6.50 usec
TE            298.3 K
D1            1.00000000 sec
D11           0 sec
TD0           1

===== CHANNEL f1 =====
SFO1          400.1324710 MHz
NUC1          1H
P1            9.63 usec
PLW1          16.00000000 W

===== CHANNEL f2 =====
SFO2          400.1324710 MHz
NUC2          off
CPDPRG[2]
PCPD2         0 usec
PLW2          0 W
PLW12         0 W
PLW13         0 W

F2 - Processing parameters
SI            65536
SF            400.1300098 MHz
WDW           EM
SSB           0
LB            0.30 Hz
GB            0
PC            1.00

```

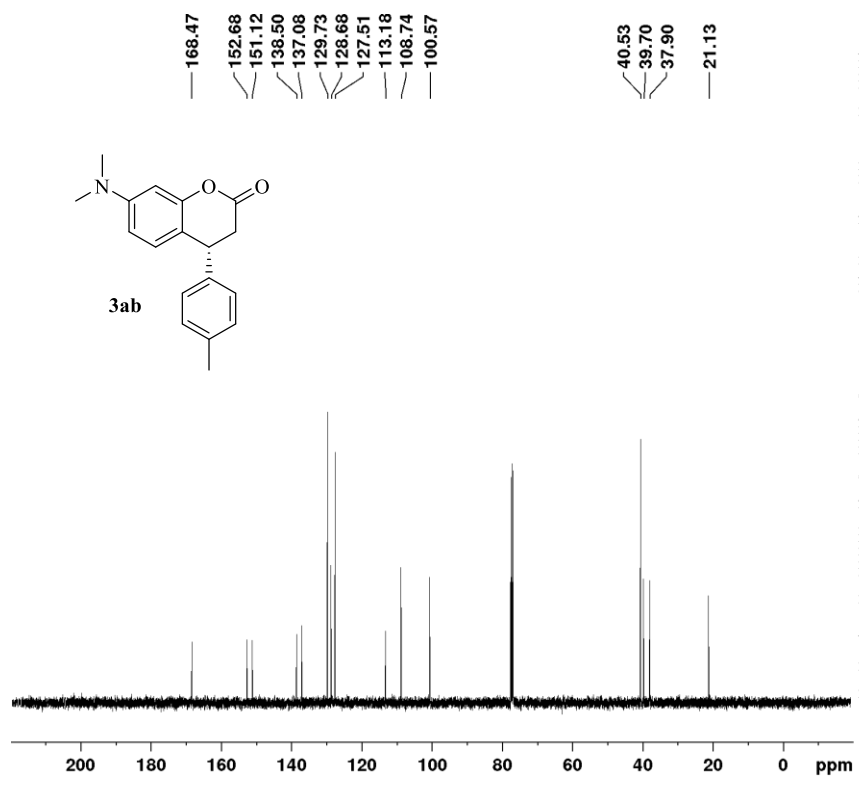

```

Current Data Parameters
NAME          GYV
EXPNO         52
PROCNO        1

F2 - Acquisition Parameters
Date_         20220622
Time          19.57
INSTRUM      spect
PROBHD       5 mm PABBO BB/
PULPROG      zgpg30
TD            65536
SOLVENT      CDCl3
NS            26
DS            4
SWH           24038.461 Hz
FIDRES        0.366798 Hz
AQ            1.3631488 sec
RG            213.76
DW            20.800 usec
DE            6.50 usec
TE            298.5 K
D1            2.00000000 sec
D11           0.03000000 sec
TD0           1

===== CHANNEL f1 =====
SFO1          100.6228293 MHz
NUC1          13C
P1            10.15 usec
PLW1          76.00000000 W

===== CHANNEL f2 =====
SFO2          400.1316005 MHz
NUC2          1H
CPDPRG[2]    waltz16
PCPD2         80.00 usec
PLW2          16.00000000 W
PLW12         0.23184000 W
PLW13         0.14838000 W

F2 - Processing parameters
SI            32768
SF            100.6127604 MHz
WDW           EM
SSB           0
LB            1.00 Hz
GB            0
PC            1.40

```



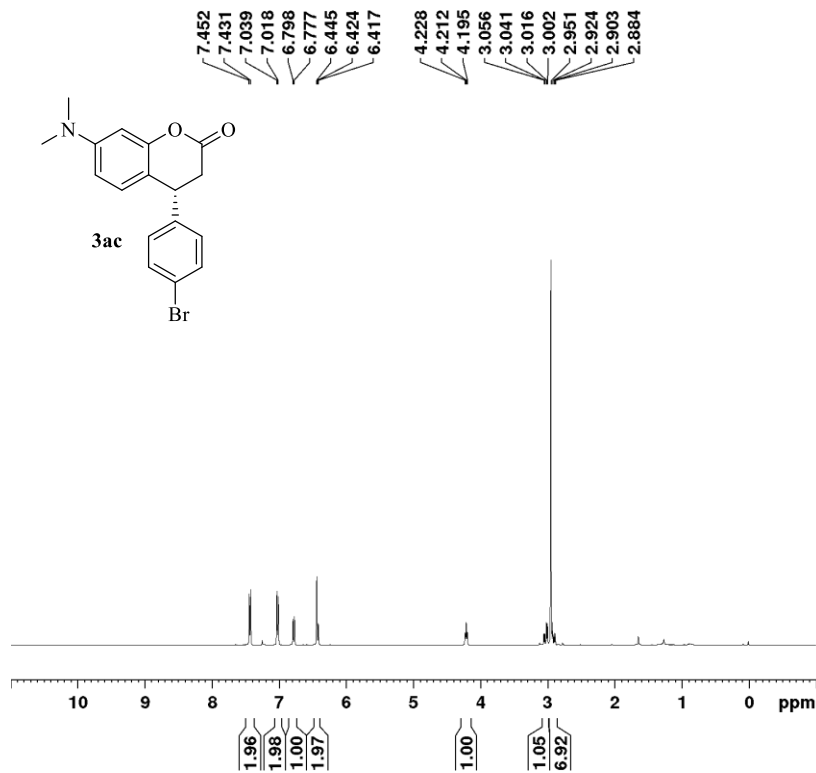

```

Current Data Parameters
NAME          gyy-sq
EXPNO        31
PROCNO       1

F2 - Acquisition Parameters
Date_        20220613
Time         15.41
INSTRUM     spect
PROBHD      5 mm PABBO BB/
PULPROG     zg30
TD          65536
SOLVENT     CDCl3
NS          3
DS          2
SWH         8012.820 Hz
FIDRES      0.122266 Hz
AQ          4.0894465 sec
RG          58.51
DW          62.400 usec
DE          6.50 usec
TE          302.9 K
D1          1.00000000 sec
TDO         1

===== CHANNEL f1 =====
SF01        400.1324710 MHz
NUC1         1H
F1           9.63 usec
PLW1        16.00000000 W

F2 - Processing parameters
SI          65536
SF          400.1300101 MHz
WDW         EM
SSB         0
LB          0.30 Hz
GB          0
PC          1.00

```

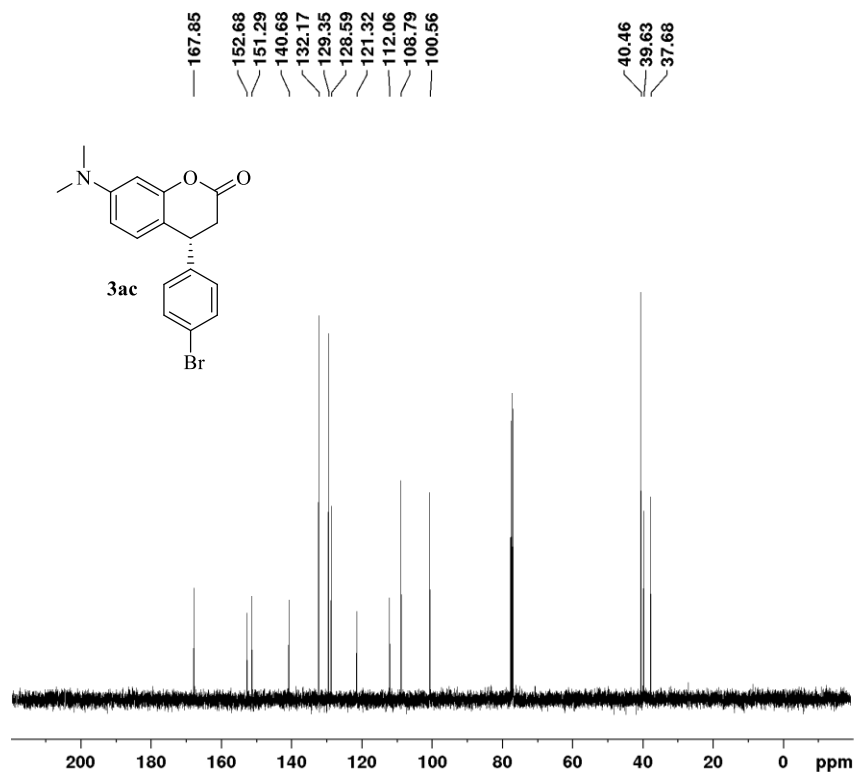

```

Current Data Parameters
NAME          gyy-sq
EXPNO        32
PROCNO       1

F2 - Acquisition Parameters
Date_        20220613
Time         15.42
INSTRUM     spect
PROBHD      5 mm PABBO BB/
PULPROG     zgpg30
TD          65536
SOLVENT     CDCl3
NS          32
DS          4
SWH         24038.461 Hz
FIDRES      0.366798 Hz
AQ          1.3631488 sec
RG          213.76
DW          20.800 usec
DE          6.50 usec
TE          303.0 K
D1          2.00000000 sec
D11         0.03000000 sec
TDO         1

===== CHANNEL f1 =====
SF01        100.6228293 MHz
NUC1         13C
F1          10.15 usec
PLW1        76.00000000 W

===== CHANNEL f2 =====
SF02        400.1316005 MHz
NUC2         1H
CPDPRG[2]   waltz16
PCPD2       80.00 usec
PLW2        16.00000000 W
PLW12       0.23184000 W
PLW13       0.14838000 W

F2 - Processing parameters
SI          32768
SF          100.6127611 MHz
WDW         EM
SSB         0
LB          1.00 Hz
GB          0
PC          1.40

```

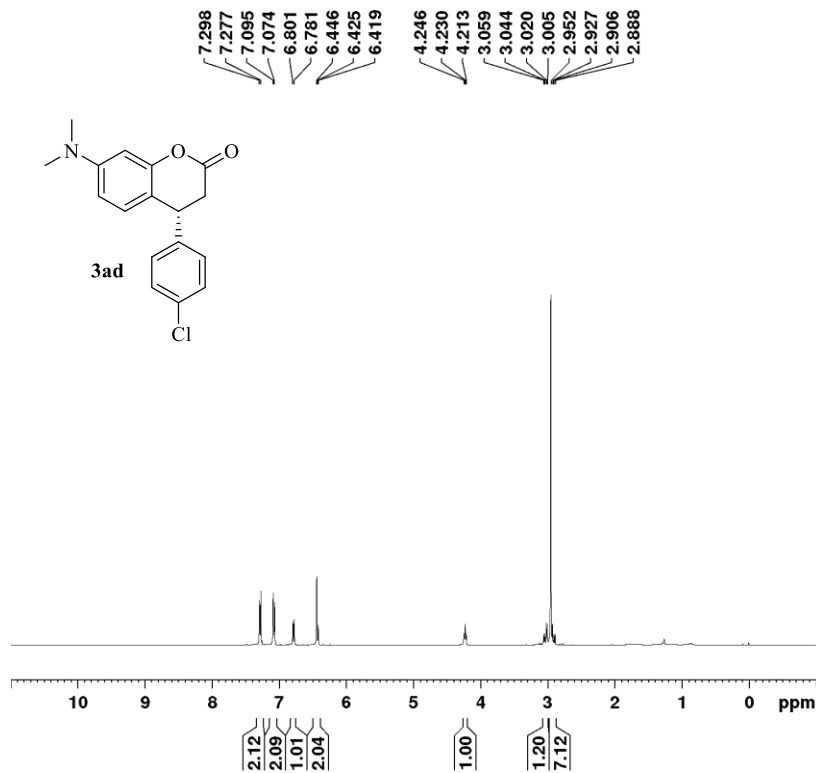

Current Data Parameters  
 NAME GYY  
 EXPNO 22  
 PROCNO 1

F2 - Acquisition Parameters  
 Date\_ 20220601  
 Time 14.30  
 INSTRUM spect  
 PROBHD 5 mm PABBO BB/  
 PULPROG zg30  
 TD 65536  
 SOLVENT CDCl3  
 NS 6  
 DS 2  
 SWH 8012.820 Hz  
 FIDRES 0.122266 Hz  
 AQ 4.0894465 sec  
 RG 31.77  
 DW 62.400 usec  
 DE 6.50 usec  
 TE 293.0 K  
 D1 1.00000000 sec  
 TD0 1

===== CHANNEL f1 =====  
 SF01 400.1324710 MHz  
 NUC1 1H  
 F1 9.63 usec  
 PLW1 16.00000000 W

F2 - Processing parameters  
 SI 65536  
 SF 400.1300099 MHz  
 WDW EM  
 SSB 0  
 LB 0.30 Hz  
 GB 0  
 PC 1.00

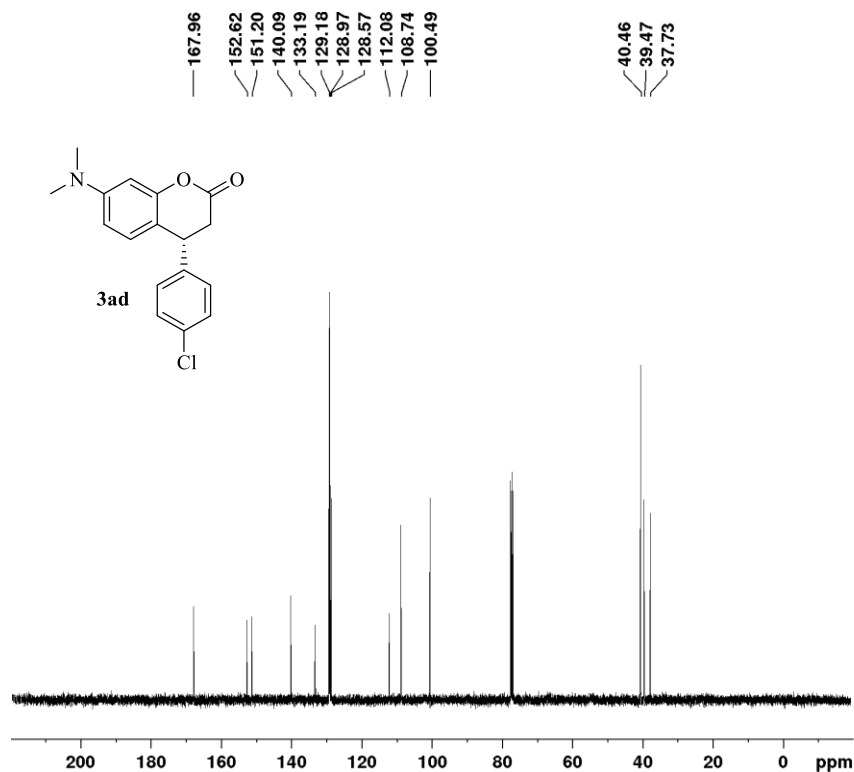

Current Data Parameters  
 NAME GYY  
 EXPNO 23  
 PROCNO 1

F2 - Acquisition Parameters  
 Date\_ 20220601  
 Time 14.32  
 INSTRUM spect  
 PROBHD 5 mm PABBO BB/  
 PULPROG zgpg30  
 TD 65536  
 SOLVENT CDCl3  
 NS 24  
 DS 4  
 SWH 24038.461 Hz  
 FIDRES 0.366798 Hz  
 AQ 1.3631488 sec  
 RG 213.76  
 DW 20.800 usec  
 DE 6.50 usec  
 TE 293.4 K  
 D1 2.00000000 sec  
 D11 0.03000000 sec  
 TD0 1

===== CHANNEL f1 =====  
 SF01 100.6228293 MHz  
 NUC1 13C  
 F1 10.15 usec  
 PLW1 76.00000000 W

===== CHANNEL f2 =====  
 SF02 400.1316005 MHz  
 NUC2 1H  
 CPDPRG[2] waltz16  
 PCPD2 80.00 usec  
 PLW2 16.00000000 W  
 PLW12 0.23184000 W  
 PLW13 0.14838000 W

F2 - Processing parameters  
 SI 32768  
 SF 100.6127648 MHz  
 WDW EM  
 SSB 0  
 LB 1.00 Hz  
 GB 0  
 PC 1.40

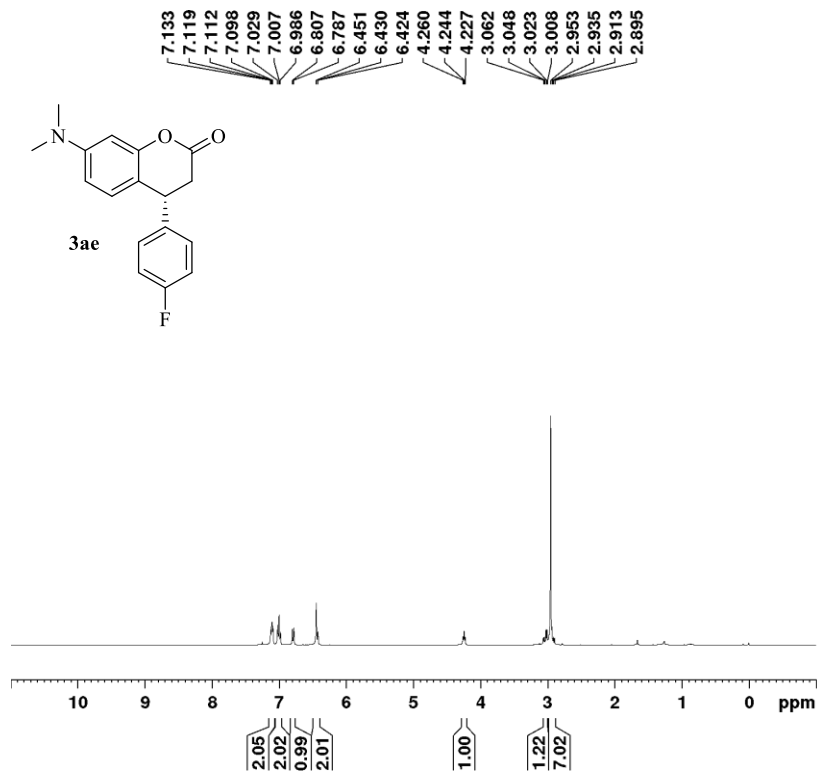

```
Current Data Parameters
NAME          GY
EXPNO         26
PROCNO        1

F2 - Acquisition Parameters
Date_         20220608
Time          15.36
INSTRUM       spect
PROBHD        5 mm PABBO BB/
PULPROG       zg30
TD            65536
SOLVENT       CDCl3
NS            10
DS            2
SWH           8012.820 Hz
FIDRES        0.122266 Hz
AQ            4.0894465 sec
RG            31.77
DW            62.400 usec
DE            6.50 usec
TE            295.4 K
D1            1.00000000 sec
TDO           1
```

```
===== CHANNEL f1 =====
SF01         400.1324710 MHz
NUC1          1H
P1            9.63 usec
PLW1         16.00000000 W

F2 - Processing parameters
SI           65536
SF           400.1300099 MHz
WDW          EM
SSB          0
LB           0.30 Hz
GB           0
PC           1.00
```

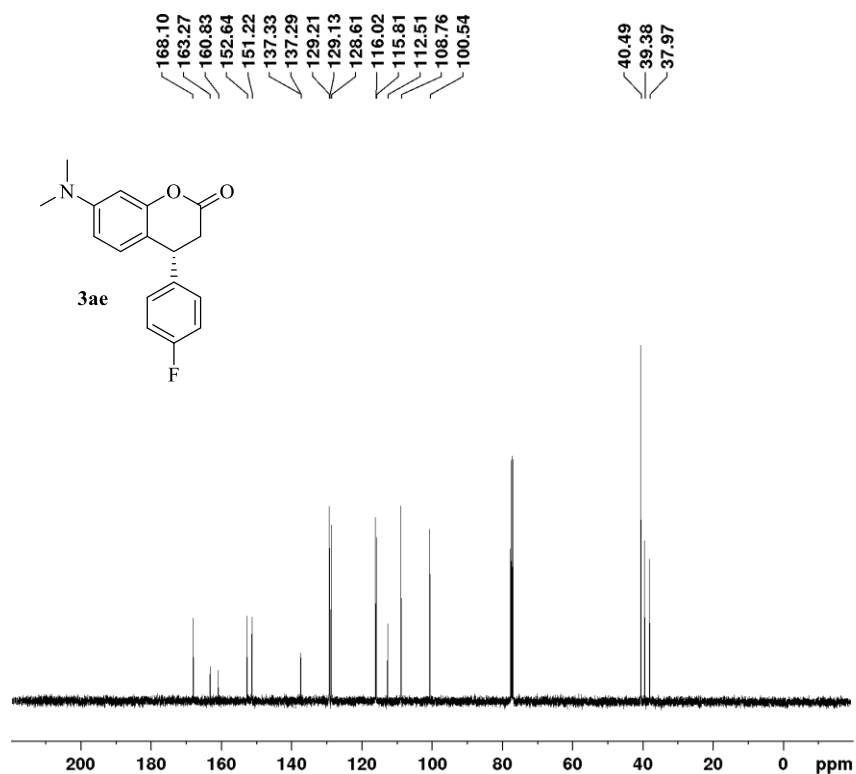

```
Current Data Parameters
NAME          GY
EXPNO         27
PROCNO        1

F2 - Acquisition Parameters
Date_         20220608
Time          15.38
INSTRUM       spect
PROBHD        5 mm PABBO BB/
PULPROG       zgpg30
TD            65536
SOLVENT       CDCl3
NS            64
DS            4
SWH           24038.461 Hz
FIDRES        0.366798 Hz
AQ            1.3631488 sec
RG            213.76
DW            20.800 usec
DE            6.50 usec
TE            295.6 K
D1            2.00000000 sec
D11           0.03000000 sec
TDO           1
```

```
===== CHANNEL f1 =====
SF01         100.6228293 MHz
NUC1          13C
P1           10.15 usec
PLW1         76.00000000 W

===== CHANNEL f2 =====
SF02         400.1316005 MHz
NUC2          1H
CPDPRG[2]    waltz16
PCPD2        80.00 usec
PLW2         16.00000000 W
PLW12        0.23184000 W
PLW13        0.14838000 W

F2 - Processing parameters
SI           32768
SF           100.6127615 MHz
WDW          EM
SSB          0
LB           1.00 Hz
GB           0
PC           1.40
```

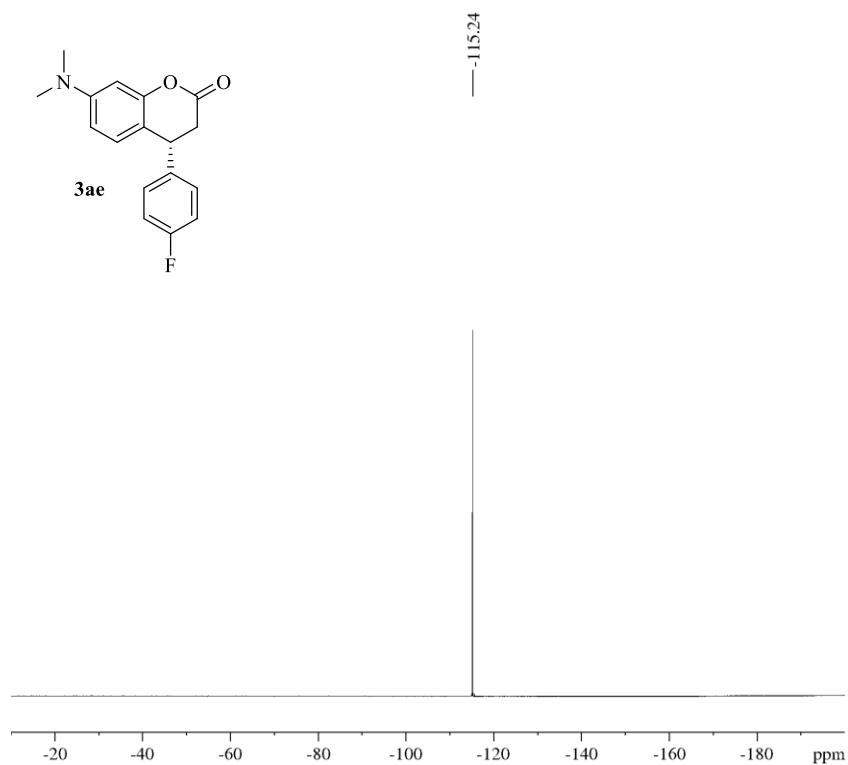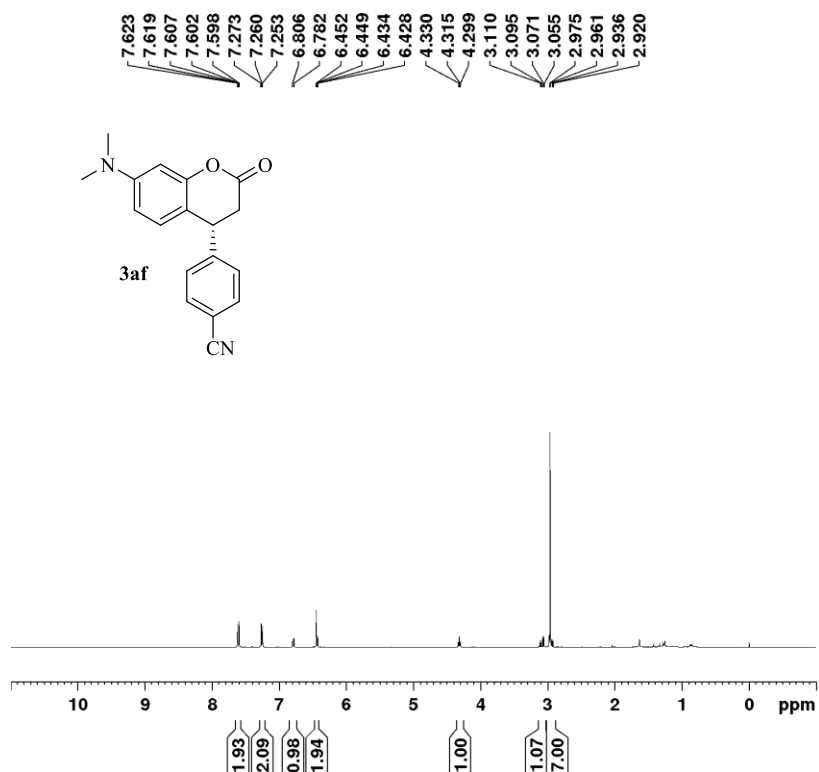

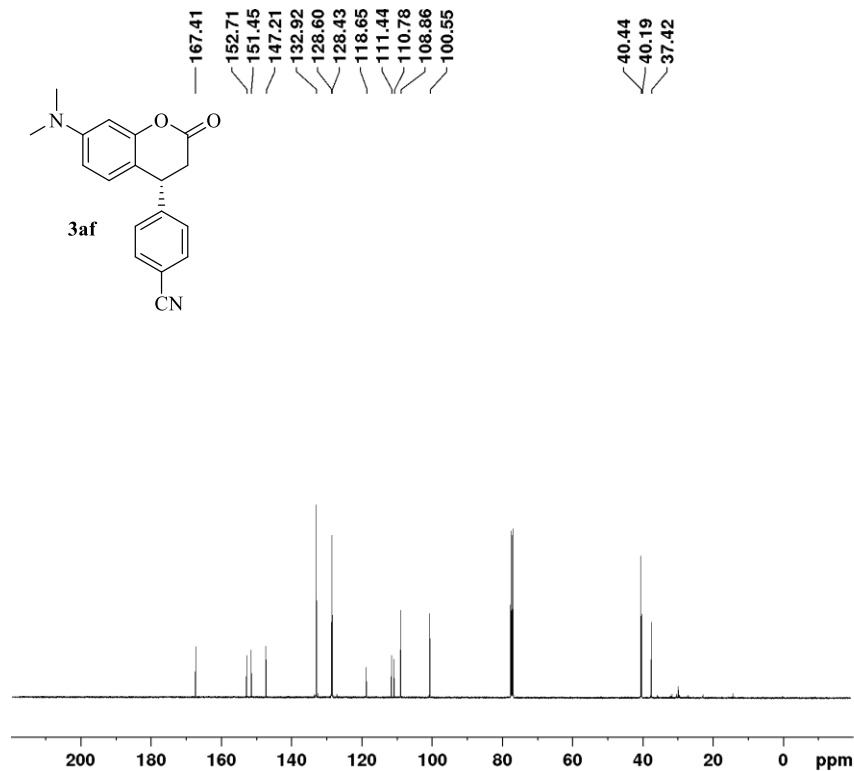

Current Data Parameters  
NAME GY  
EXPNO 128  
PROCNO 1

F2 - Acquisition Parameters  
Date\_ 20220731  
Time 2.54  
INSTRUM spect  
PROBHD 5 mm PABBO BB/  
PULPROG zgpg30  
TD 65536  
SOLVENT CDCl3  
NS 1024  
DS 4  
SWH 24038.461 Hz  
FIDRES 0.366798 Hz  
AQ 1.3631468 sec  
RG 213.76  
DW 20.800 usec  
DE 6.50 usec  
TE 296.1 K  
D1 2.0000000 sec  
D11 0.0300000 sec  
TDO 1

===== CHANNEL f1 =====  
SFO1 100.6228293 MHz  
NUC1 13C  
P1 10.15 usec  
PLW1 76.00000000 W

===== CHANNEL f2 =====  
SFO2 400.1316005 MHz  
NUC2 1H  
CPDPRG[2] waltz16  
PCPD2 80.00 usec  
PLW2 16.00000000 W  
PLW12 0.23184000 W  
PLW13 0.14838000 W

F2 - Processing parameters  
SI 32768  
SF 100.6127607 MHz  
WDW EM  
SSB 0  
LB 1.00 Hz  
GB 0  
PC 1.40

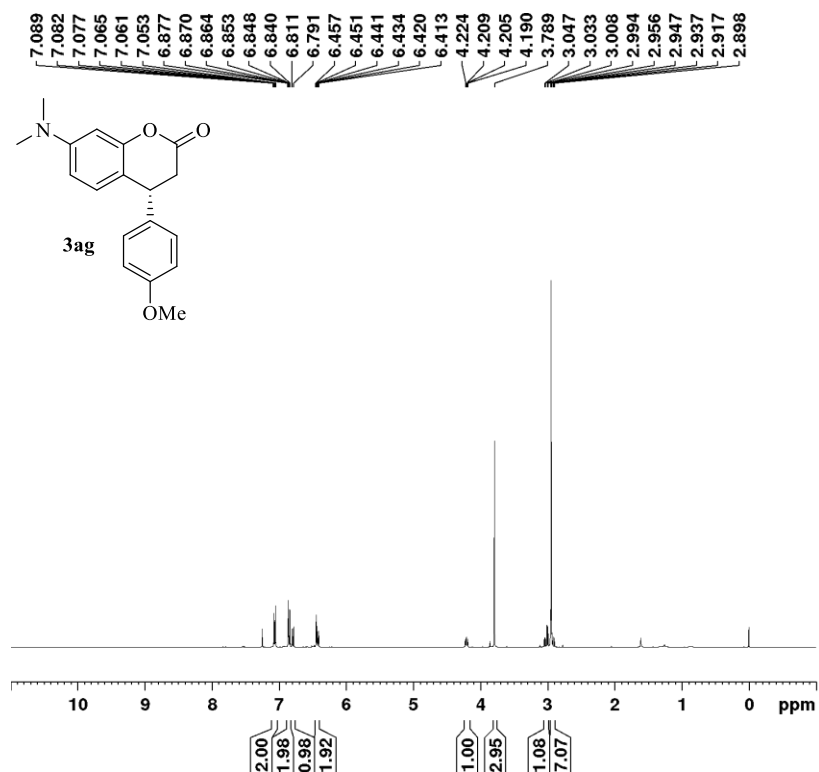

Current Data Parameters  
NAME GY  
EXPNO 24  
PROCNO 1

F2 - Acquisition Parameters  
Date\_ 20220606  
Time 14.56  
INSTRUM spect  
PROBHD 5 mm PABBO BB/  
PULPROG zg30  
TD 65536  
SOLVENT CDCl3  
NS 6  
DS 2  
SWH 8012.820 Hz  
FIDRES 0.122266 Hz  
AQ 4.0894465 sec  
RG 84.43  
DW 62.400 usec  
DE 6.50 usec  
TE 293.8 K  
D1 1.0000000 sec  
TDO 1

===== CHANNEL f1 =====  
SFO1 400.1324710 MHz  
NUC1 1H  
P1 9.63 usec  
PLW1 16.00000000 W

F2 - Processing parameters  
SI 65536  
SF 400.1300098 MHz  
WDW EM  
SSB 0  
LB 0.30 Hz  
GB 0  
PC 1.00

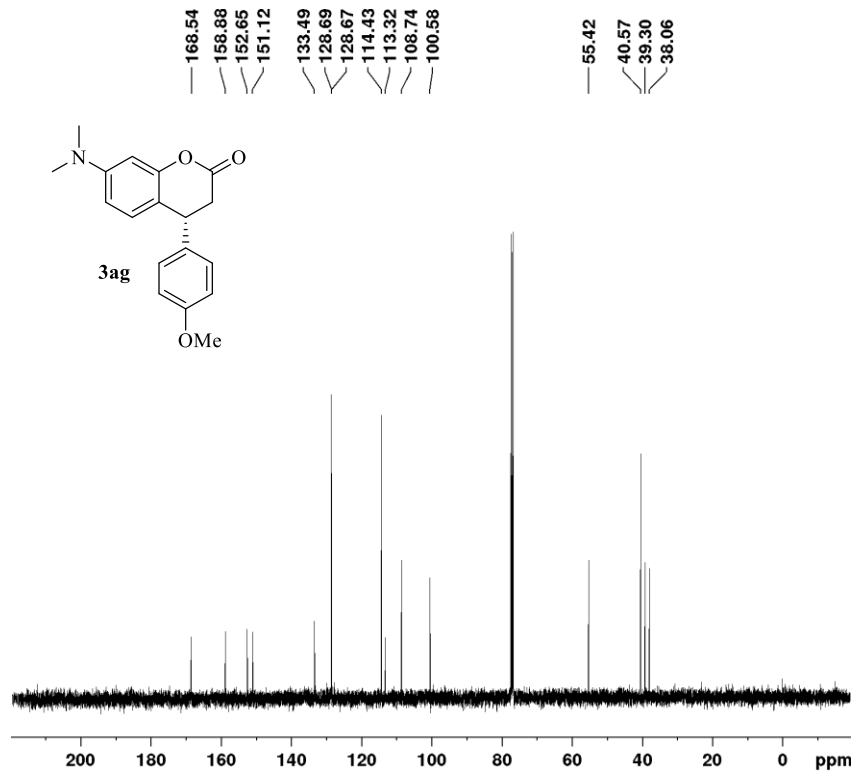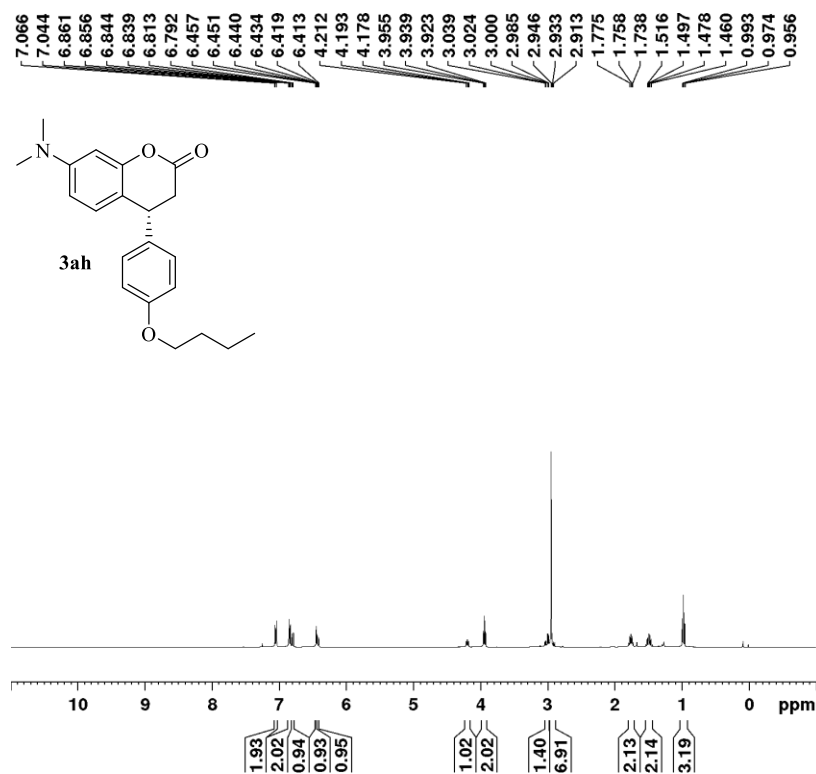

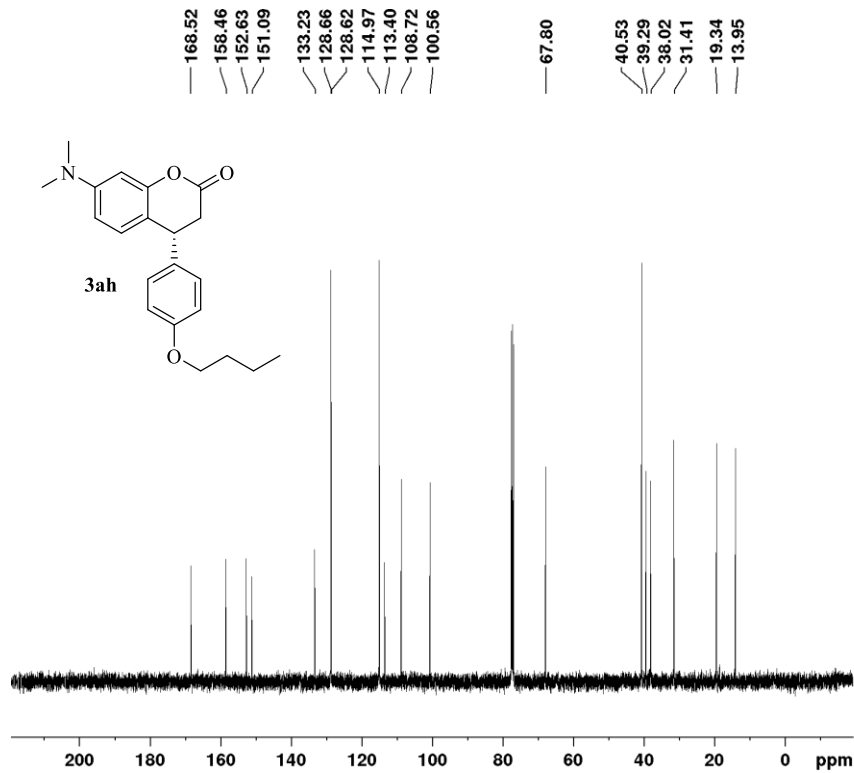

```

Current Data Parameters
NAME          GYY
EXPNO        208
PROCNO       1

F2 - Acquisition Parameters
Date_        20220927
Time         10.37
INSTRUM     spect
PROBHD      5 mm PABBO BB/
PULPROG     zgpg30
TD           65536
SOLVENT     CDCl3
NS           44
DS           4
SWH          24038.461 Hz
FIDRES      0.366798 Hz
AQ           1.3631468 sec
RG           213.76
DW           20.800 usec
DE           6.50 usec
TE           297.4 K
D1           2.0000000 sec
D11          0.0300000 sec
TDO         1

===== CHANNEL f1 =====
SFO1        100.6228293 MHz
NUC1         13C
P1           10.15 usec
PLW1        76.00000000 W

===== CHANNEL f2 =====
SFO2        400.1316005 MHz
NUC2         1H
CPDPRG[2]   waltz16
PCPD2       80.00 usec
PLW2        16.0000000 W
PLW12       0.23184000 W
PLW13       0.14838000 W

F2 - Processing parameters
SI           32768
SF           100.6127611 MHz
WDW          EM
SSB          0
LB           1.00 Hz
GB           0
PC           1.40
  
```

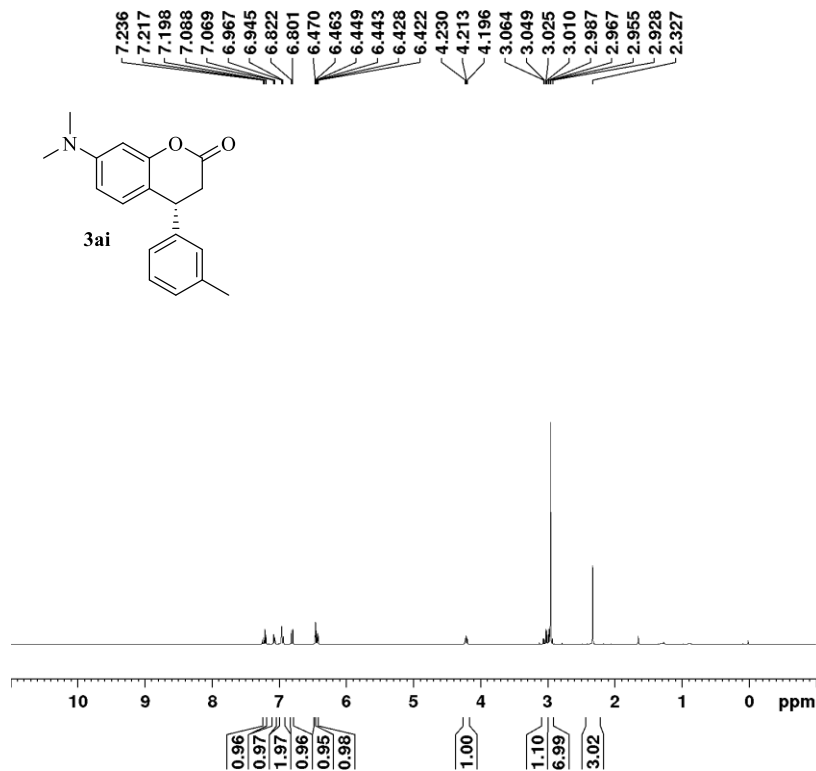

```

Current Data Parameters
NAME          GYY
EXPNO        53
PROCNO       1

F2 - Acquisition Parameters
Date_        20220622
Time         19.49
INSTRUM     spect
PROBHD      5 mm PABBO BB/
PULPROG     zg30
TD           65536
SOLVENT     CDCl3
NS           4
DS           2
SWH          8012.820 Hz
FIDRES      0.122266 Hz
AQ           4.0894465 sec
RG           58.51
DW           62.400 usec
DE           6.50 usec
TE           298.3 K
D1           1.0000000 sec
D11          0 sec
TDO         1

===== CHANNEL f1 =====
SFO1        400.1324710 MHz
NUC1         1H
P1           9.63 usec
PLW1        16.00000000 W

===== CHANNEL f2 =====
SFO2        400.1324710 MHz
NUC2         off
CPDPRG[2]   off
PCPD2       0 usec
PLW2        0 W
PLW12       0 W
PLW13       0 W

F2 - Processing parameters
SI           65536
SF           400.1300098 MHz
WDW          EM
SSB          0
LB           0.30 Hz
GB           0
PC           1.00
  
```

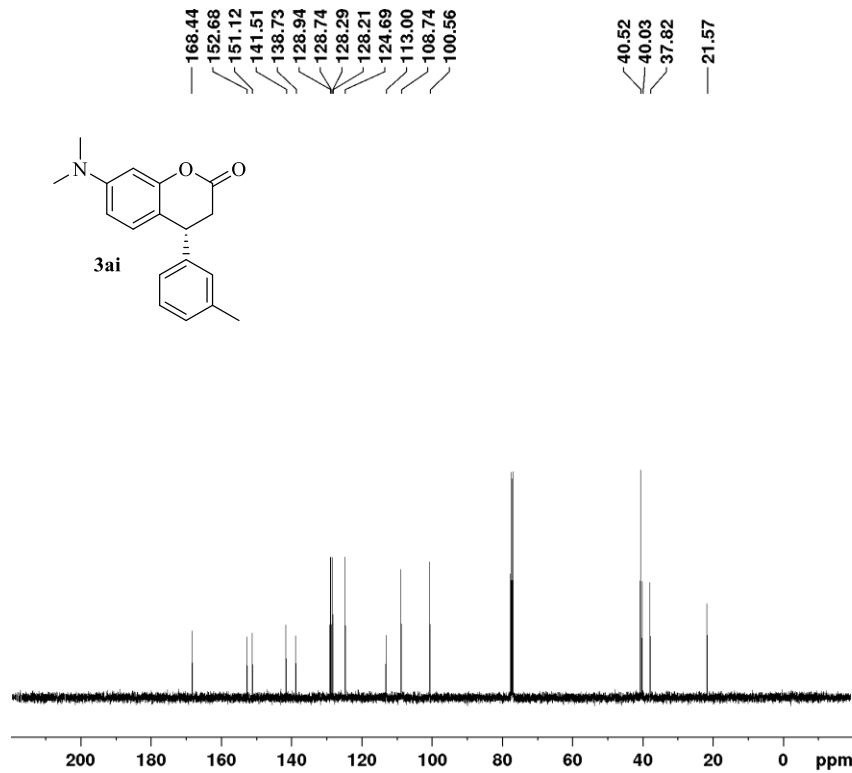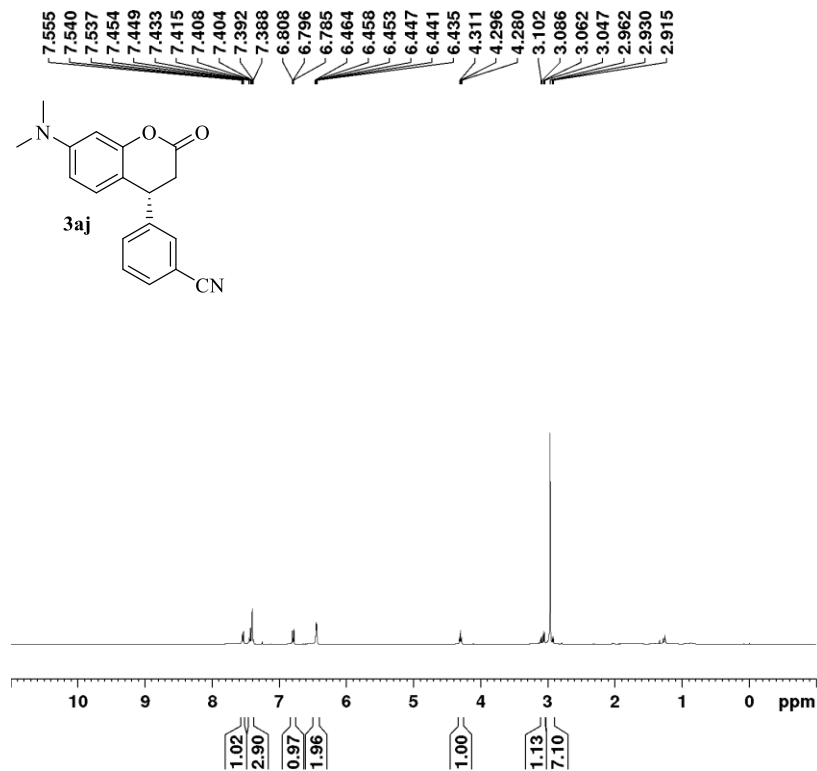



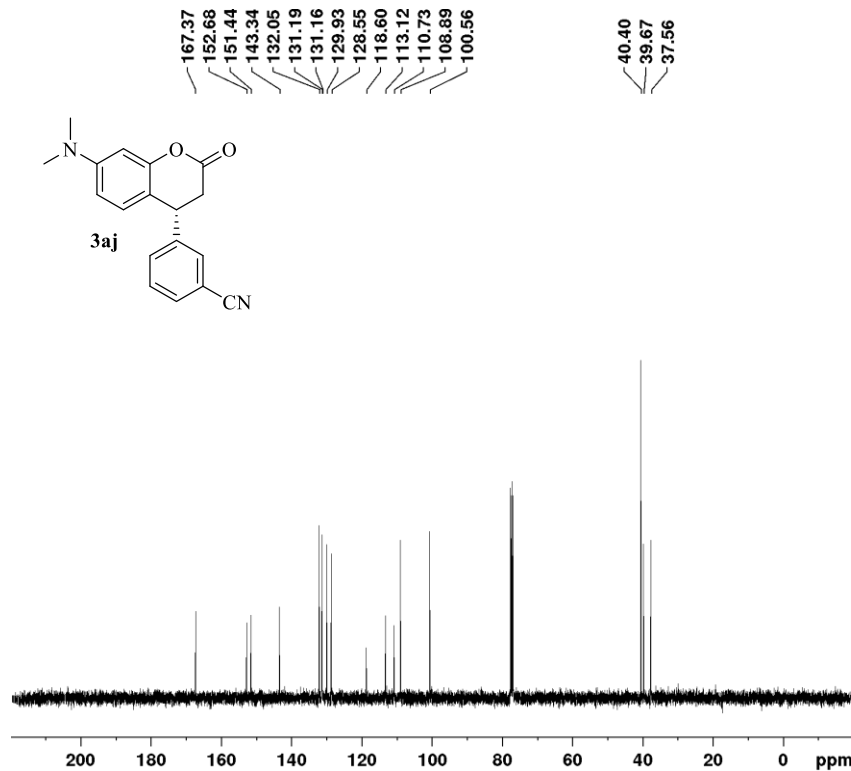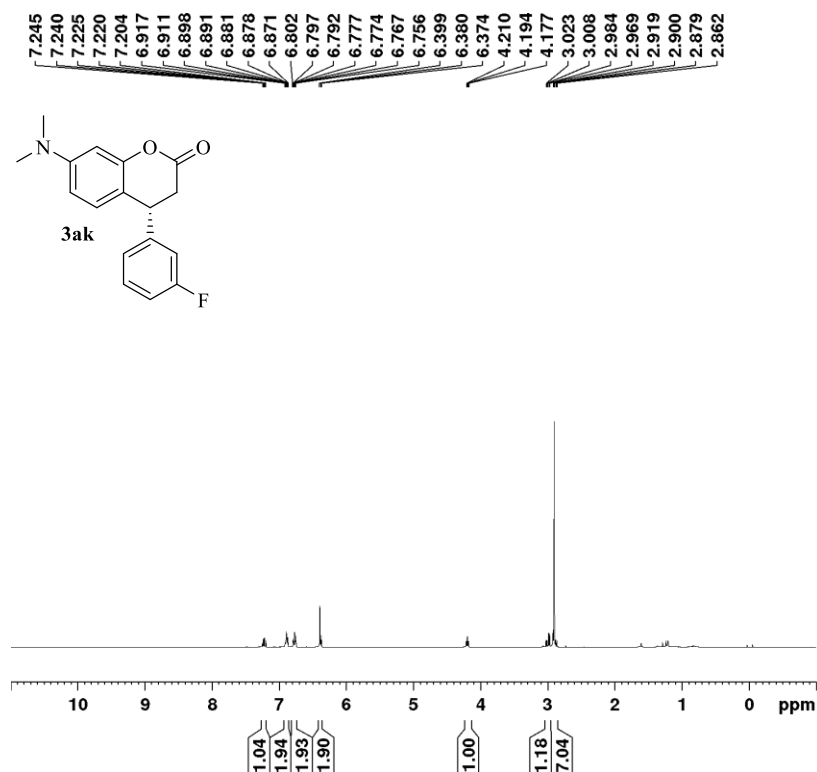

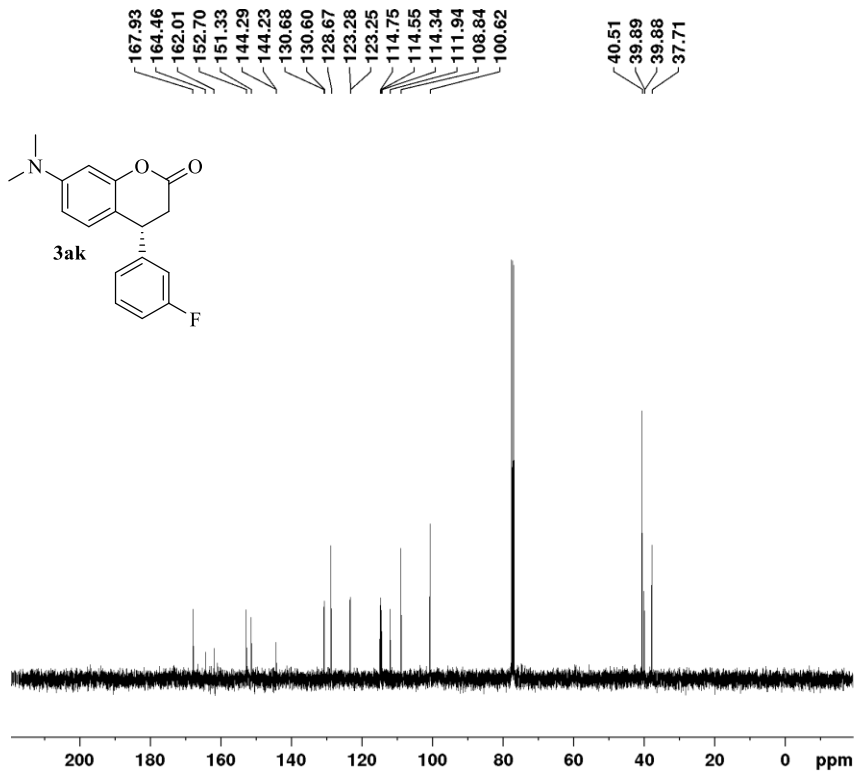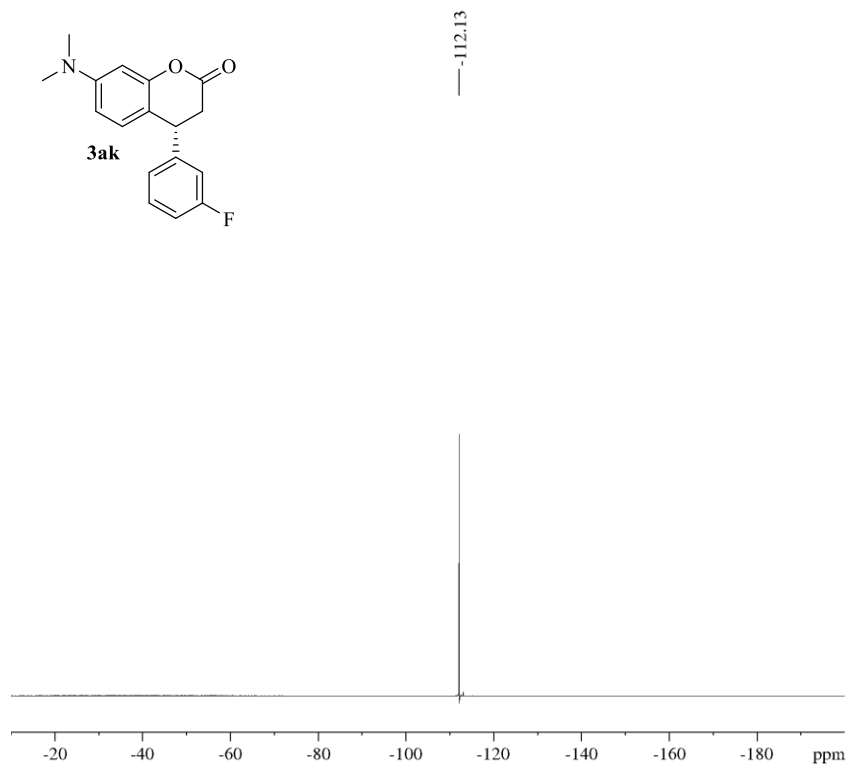

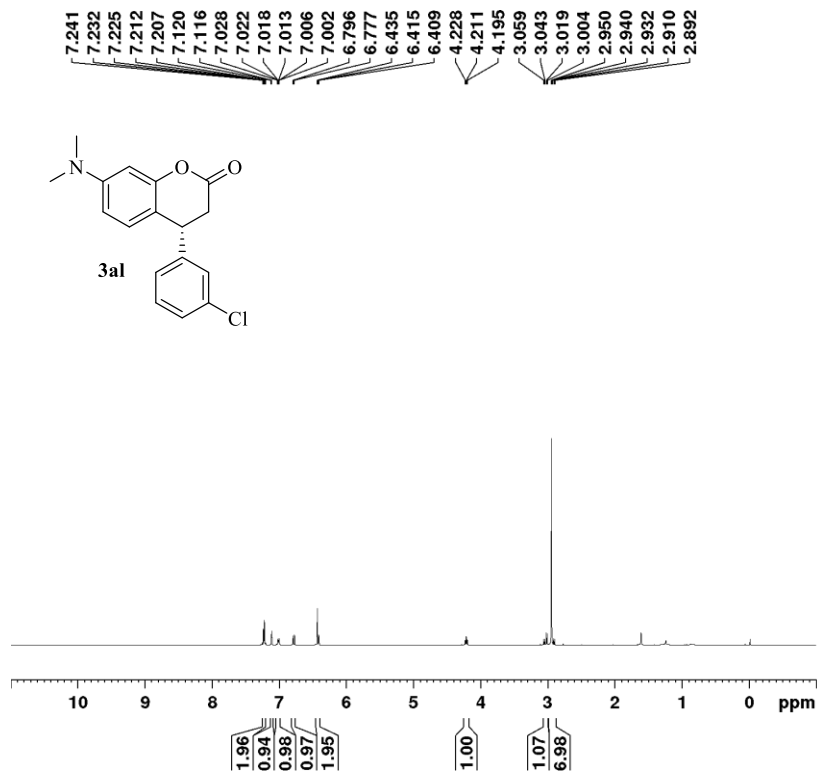

Current Data Parameters  
 NAME GYY  
 EXPNO 57  
 PROCNO 1

F2 - Acquisition Parameters  
 Date\_ 20220628  
 Time 9.51  
 INSTRUM spect  
 PROBHD 5 mm PABBO BB/  
 PULPROG zg30  
 TD 65536  
 SOLVENT CDCl3  
 NS 6  
 DS 2  
 SWH 8012.820 Hz  
 FIDRES 0.122266 Hz  
 AQ 4.0894465 sec  
 RG 84.43  
 DW 62.400 usec  
 DE 6.50 usec  
 TE 295.9 K  
 D1 1.00000000 sec  
 D11 0 sec  
 TD0 1

===== CHANNEL f1 =====  
 SFO1 400.1324710 MHz  
 NUC1 1H  
 P1 9.63 usec  
 PLW1 16.00000000 W

===== CHANNEL f2 =====  
 SFO2 400.1324710 MHz  
 NUC2 off  
 CPDPRG[2]  
 PCPD2 0 usec  
 PLW2 0 W  
 PLW12 0 W  
 PLW13 0 W

F2 - Processing parameters  
 SI 65536  
 SF 400.1300172 MHz  
 WDW EM  
 SSB 0  
 LB 0.30 Hz  
 GB 0  
 PC 1.00

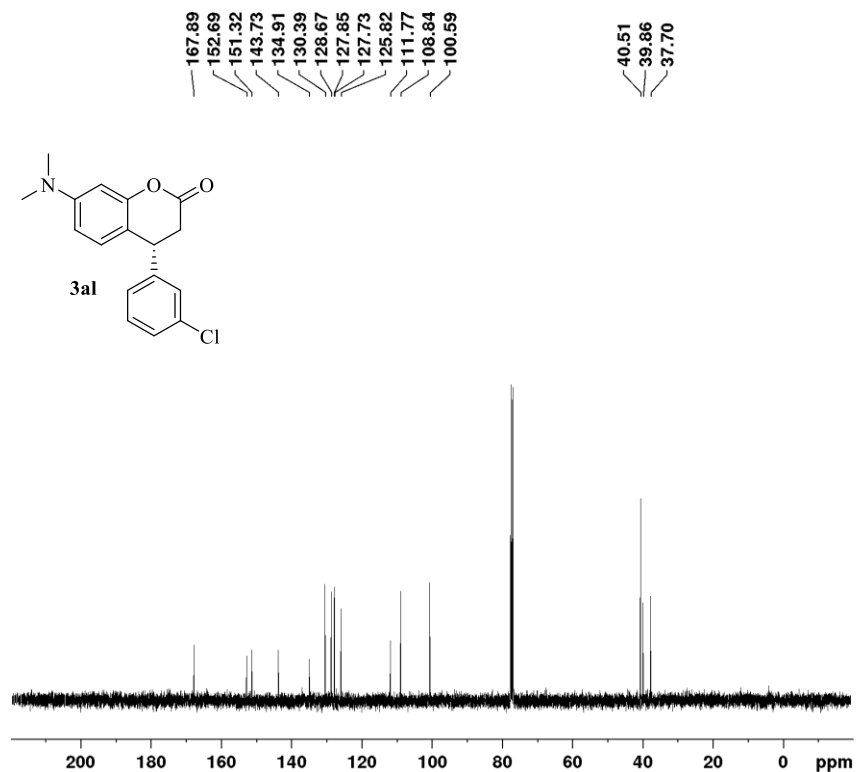

Current Data Parameters  
 NAME GYY  
 EXPNO 58  
 PROCNO 1

F2 - Acquisition Parameters  
 Date\_ 20220628  
 Time 9.54  
 INSTRUM spect  
 PROBHD 5 mm PABBO BB/  
 PULPROG zgpg30  
 TD 65536  
 SOLVENT CDCl3  
 NS 32  
 DS 4  
 SWH 24038.461 Hz  
 FIDRES 0.366798 Hz  
 AQ 1.3631488 sec  
 RG 213.76  
 DW 20.800 usec  
 DE 6.50 usec  
 TE 296.1 K  
 D1 2.00000000 sec  
 D11 0.03000000 sec  
 TD0 1

===== CHANNEL f1 =====  
 SFO1 100.6228293 MHz  
 NUC1 13C  
 P1 10.15 usec  
 PLW1 76.00000000 W

===== CHANNEL f2 =====  
 SFO2 400.1316005 MHz  
 NUC2 1H  
 CPDPRG[2] waitz16  
 PCPD2 80.00 usec  
 PLW2 16.00000000 W  
 PLW12 0.23184000 W  
 PLW13 0.14838000 W

F2 - Processing parameters  
 SI 32768  
 SF 100.6127585 MHz  
 WDW EM  
 SSB 0  
 LB 1.00 Hz  
 GB 0  
 PC 1.40

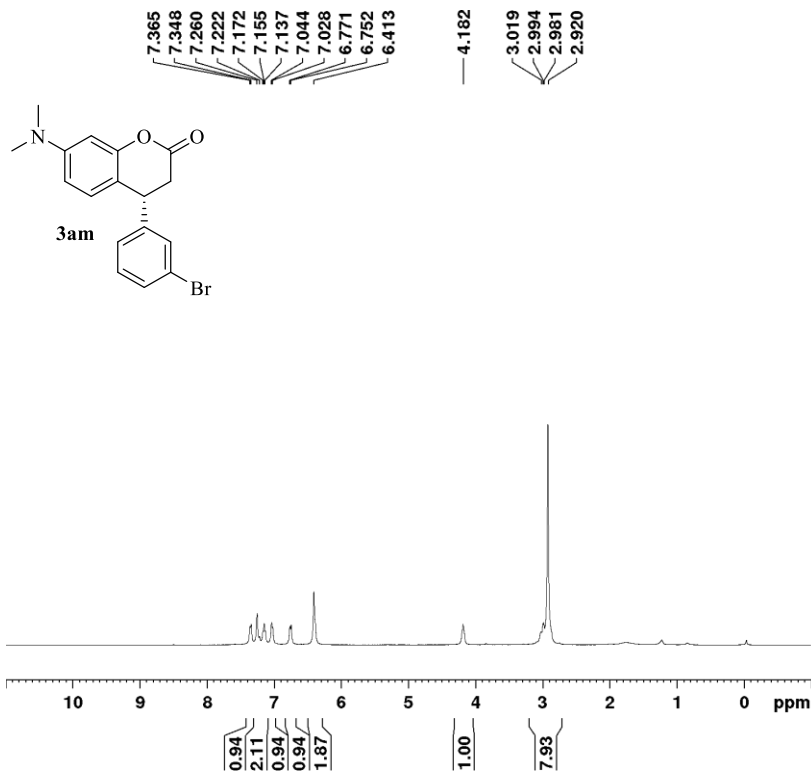

```

Current Data Parameters
NAME          GYY
EXPNO         101
PROCNO        1

F2 - Acquisition Parameters
Date_         20220721
Time          20.58
INSTRUM       spect
PROBHD        5 mm PABBO BB/
PULPROG       zg30
TD            65536
SOLVENT       CDCl3
NS            5
DS            2
SWH           8012.820 Hz
FIDRES        0.122266 Hz
AQ            4.0894465 sec
RG            84.43
DW            62.400 usec
DE            6.50 usec
TE            296.1 K
D1            1.00000000 sec
D11           0 sec
TD0           1

===== CHANNEL f1 =====
SFO1          400.1324710 MHz
NUC1          1H
P1            9.63 usec
PLW1          16.00000000 W

===== CHANNEL f2 =====
SFO2          400.1324710 MHz
NUC2          off
CPDPRG[2]
PCPD2         0 usec
PLW2          0 W
PLW12         0 W
PLW13         0 W

F2 - Processing parameters
SI            65536
SF            400.1300254 MHz
WDW           EM
SSB           0
LB            0.30 Hz
GB            0
PC            1.00
  
```

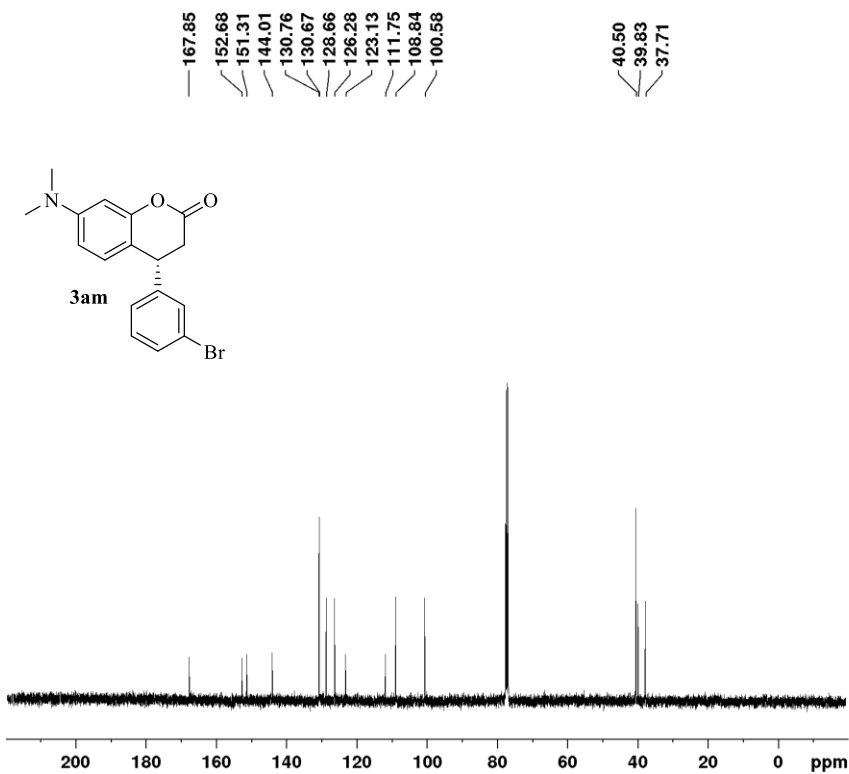

```

Current Data Parameters
NAME          GYY
EXPNO         102
PROCNO        1

F2 - Acquisition Parameters
Date_         20220721
Time          21.01
INSTRUM       spect
PROBHD        5 mm PABBO BB/
PULPROG       zgpg30
TD            65536
SOLVENT       CDCl3
NS            154
DS            4
SWH           24038.461 Hz
FIDRES        0.366798 Hz
AQ            1.3631488 sec
RG            213.76
DW            20.800 usec
DE            6.50 usec
TE            296.4 K
D1            2.00000000 sec
D11           0.03000000 sec
TD0           1

===== CHANNEL f1 =====
SFO1          100.6228293 MHz
NUC1          13C
P1            10.15 usec
PLW1          76.00000000 W

===== CHANNEL f2 =====
SFO2          400.1316005 MHz
NUC2          1H
CPDPRG[2]     waltz16
PCPD2         80.00 usec
PLW2          16.00000000 W
PLW12         0.23184000 W
PLW13         0.14838000 W

F2 - Processing parameters
SI            32768
SF            100.6127592 MHz
WDW           EM
SSB           0
LB            1.00 Hz
GB            0
PC            1.40
  
```

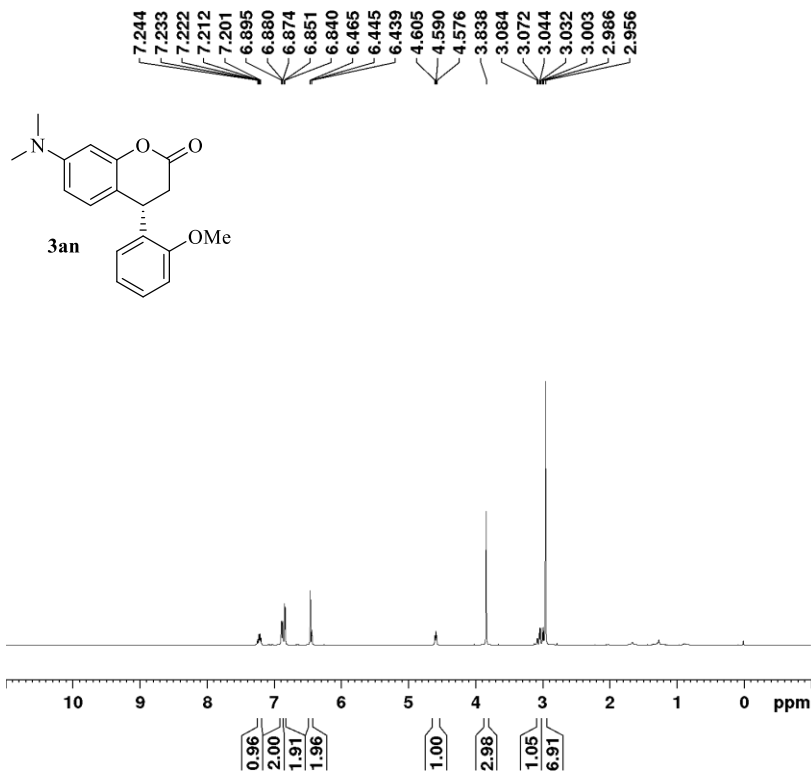

Current Data Parameters  
 NAME GYY  
 EXPNO 42  
 PROCNO 1

F2 - Acquisition Parameters  
 Date\_ 20220619  
 Time 10.18  
 INSTRUM spect  
 PROBHD 5 mm PABBO BB/  
 PULPROG zg30  
 TD 65536  
 SOLVENT CDCl3  
 NS 16  
 DS 2  
 SWH 8012.820 Hz  
 FIDRES 0.122266 Hz  
 AQ 4.0894465 sec  
 RG 58.51  
 DW 62.400 usec  
 DE 6.50 usec  
 TE 294.4 K  
 D1 1.00000000 sec  
 TD0 1

===== CHANNEL f1 =====  
 SF01 400.1324710 MHz  
 NUC1 1H  
 F1 9.63 usec  
 PLW1 16.00000000 W

F2 - Processing parameters  
 SI 65536  
 SF 400.1300098 MHz  
 WDW EM  
 SSB 0  
 LB 0.30 Hz  
 GB 0  
 PC 1.00

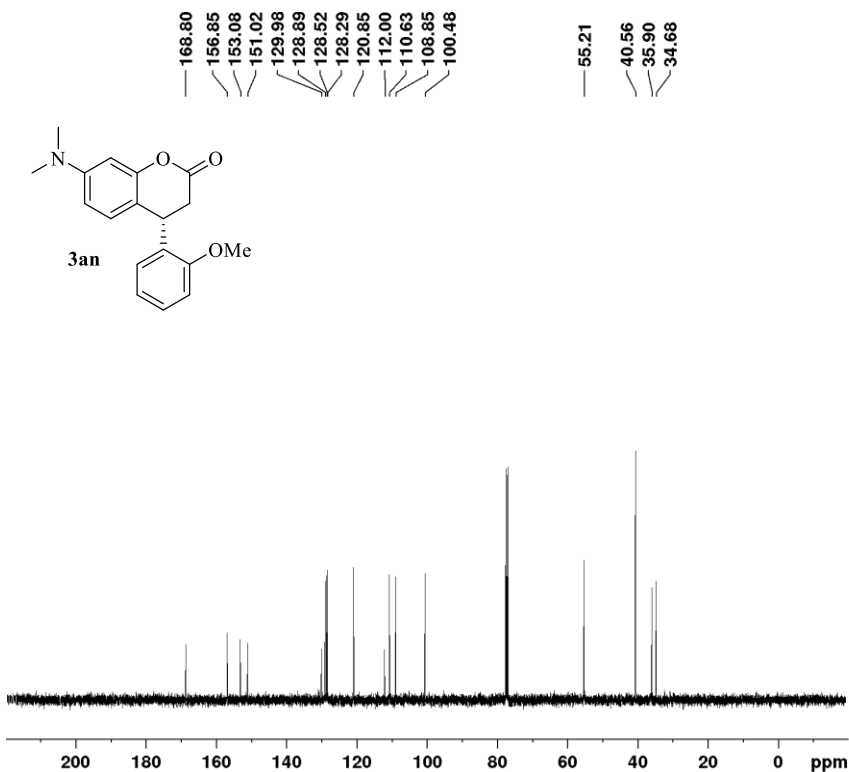

Current Data Parameters  
 NAME GYY  
 EXPNO 43  
 PROCNO 1

F2 - Acquisition Parameters  
 Date\_ 20220619  
 Time 10.25  
 INSTRUM spect  
 PROBHD 5 mm PABBO BB/  
 PULPROG zgpg30  
 TD 65536  
 SOLVENT CDCl3  
 NS 27  
 DS 4  
 SWH 24038.461 Hz  
 FIDRES 0.366798 Hz  
 AQ 1.3631488 sec  
 RG 213.76  
 DW 20.800 usec  
 DE 6.50 usec  
 TE 294.6 K  
 D1 2.00000000 sec  
 D11 0.03000000 sec  
 TD0 1

===== CHANNEL f1 =====  
 SF01 100.6228293 MHz  
 NUC1 13C  
 F1 10.15 usec  
 PLW1 76.00000000 W

===== CHANNEL f2 =====  
 SF02 400.1316005 MHz  
 NUC2 1H  
 CPDPRG[2] waitz16  
 PCPD2 80.00 usec  
 PLW2 16.00000000 W  
 PLW12 0.23184000 W  
 PLW13 0.14838000 W

F2 - Processing parameters  
 SI 32768  
 SF 100.6127615 MHz  
 WDW EM  
 SSB 0  
 LB 1.00 Hz  
 GB 0  
 PC 1.40

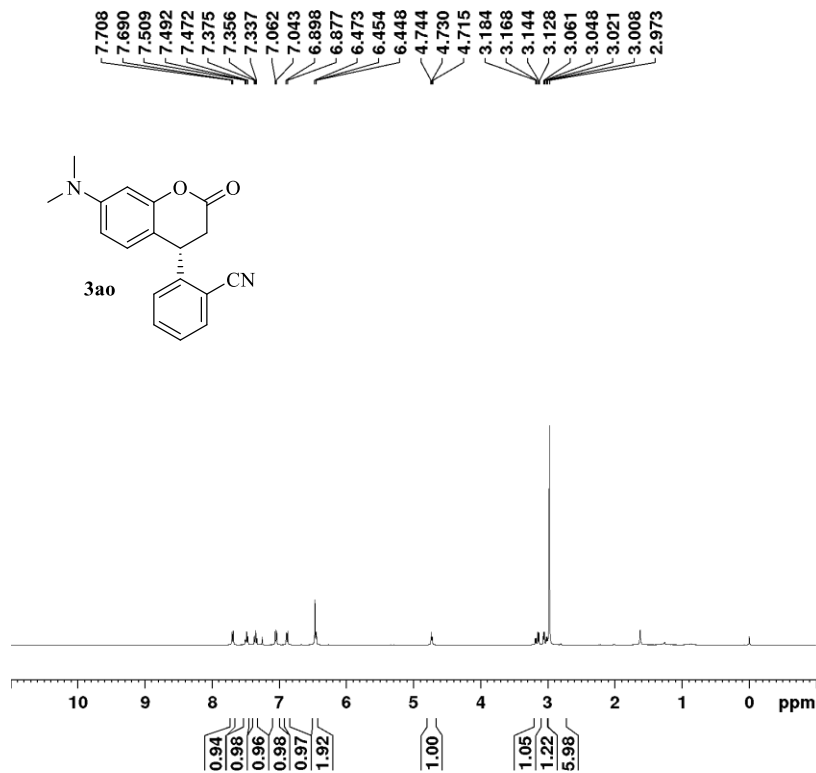

```
Current Data Parameters
NAME          GYY
EXPNO         122
PROCNO        1

F2 - Acquisition Parameters
Date_         20220729
Time          16.47
INSTRUM       spect
PROBHD        5 mm PABBO BB/
PULPROG       zg30
TD            65536
SOLVENT       CDCl3
NS            4
DS            2
SWH           8012.820 Hz
FIDRES        0.122266 Hz
AQ            4.0894465 sec
RG            104.2
DW            62.400 usec
DE            6.50 usec
TE            295.3 K
D1            1.00000000 sec
D11           0 sec
TD0           1

===== CHANNEL f1 =====
SFO1          400.1324710 MHz
NUC1          1H
P1            9.63 usec
PLW1          16.00000000 W

===== CHANNEL f2 =====
SFO2          400.1324710 MHz
NUC2          off
CPDPRG[2]
PCPD2         0 usec
PLW2          0 W
PLW12         0 W
PLW13         0 W

F2 - Processing parameters
SI            65536
SF            400.1300099 MHz
WDW           EM
SSB           0
LB            0.30 Hz
GB            0
PC            1.00
```

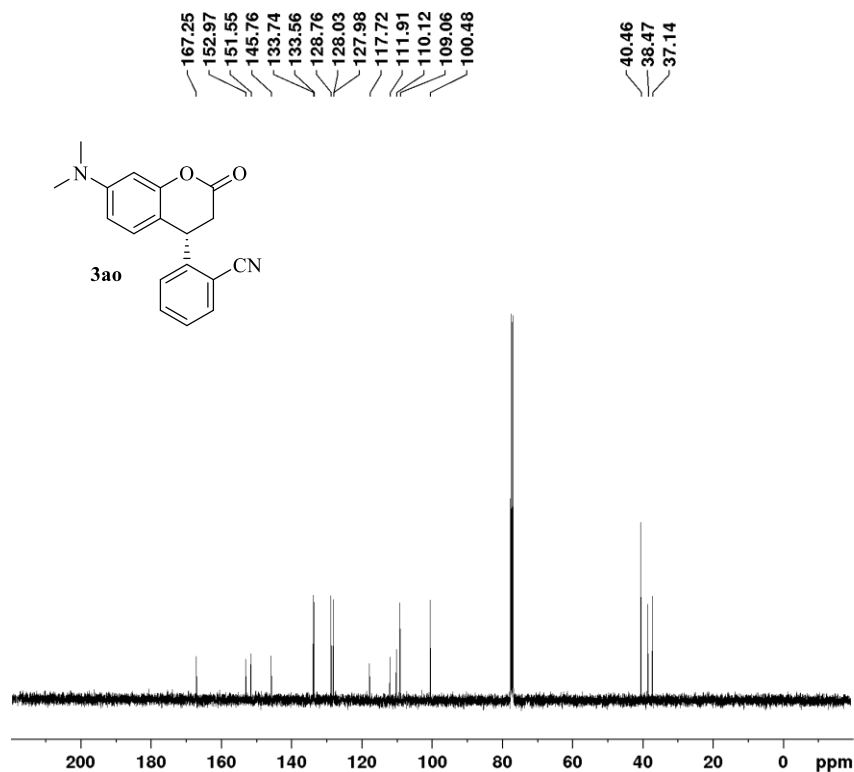

```
Current Data Parameters
NAME          GYY
EXPNO         123
PROCNO        1

F2 - Acquisition Parameters
Date_         20220729
Time          16.49
INSTRUM       spect
PROBHD        5 mm PABBO BB/
PULPROG       zgpg30
TD            65536
SOLVENT       CDCl3
NS            73
DS            4
SWH           24038.461 Hz
FIDRES        0.366798 Hz
AQ            1.3631488 sec
RG            213.76
DW            20.800 usec
DE            6.50 usec
TE            295.5 K
D1            2.00000000 sec
D11           0.03000000 sec
TD0           1

===== CHANNEL f1 =====
SFO1          100.6228293 MHz
NUC1          13C
P1            10.15 usec
PLW1          76.00000000 W

===== CHANNEL f2 =====
SFO2          400.1316005 MHz
NUC2          1H
CPDPRG[2]     waitz16
PCPD2         80.00 usec
PLW2          16.00000000 W
PLW12         0.23184000 W
PLW13         0.14838000 W

F2 - Processing parameters
SI            32768
SF            100.6127585 MHz
WDW           EM
SSB           0
LB            1.00 Hz
GB            0
PC            1.40
```

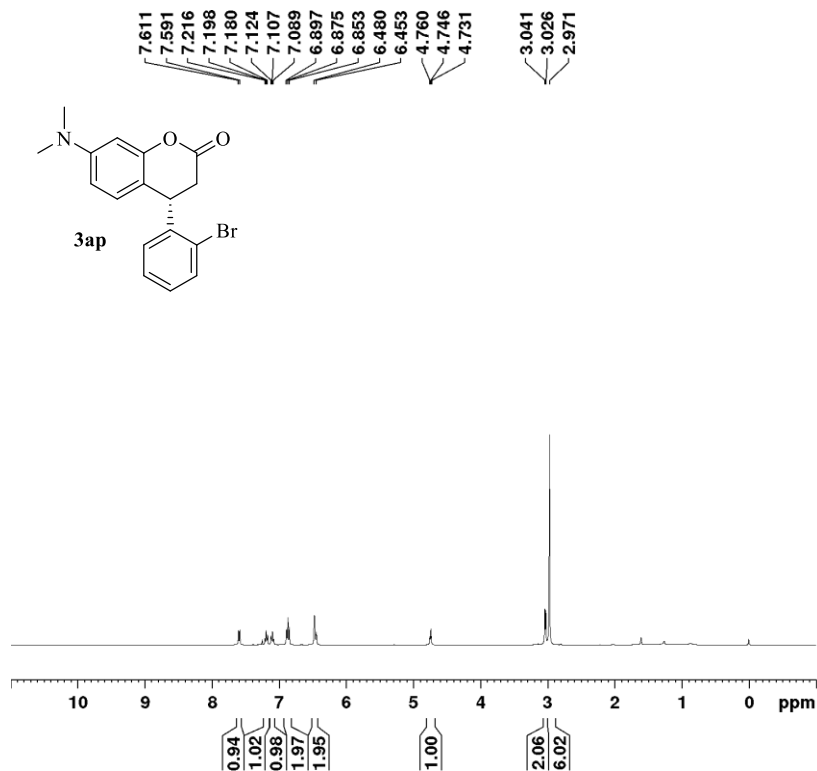

Current Data Parameters  
 NAME GYY  
 EXPNO 88  
 PROCNO 1

F2 - Acquisition Parameters  
 Date\_ 20220715  
 Time 17.42  
 INSTRUM spect  
 PROBHD 5 mm PABBO BB/  
 PULPROG zg30  
 TD 65536  
 SOLVENT CDCl3  
 NS 16  
 DS 2  
 SWH 8012.820 Hz  
 FIDRES 0.122266 Hz  
 AQ 4.0894465 sec  
 RG 84.43  
 DW 62.400 usec  
 DE 6.50 usec  
 TE 297.1 K  
 D1 1.00000000 sec  
 D11 0 sec  
 TD0 1

===== CHANNEL f1 =====  
 SFO1 400.1324710 MHz  
 NUC1 1H  
 P1 9.63 usec  
 PLW1 16.00000000 W

===== CHANNEL f2 =====  
 SFO2 400.1324710 MHz  
 NUC2 off  
 CPDPRG[2]  
 PCPD2 0 usec  
 PLW2 0 W  
 PLW12 0 W  
 PLW13 0 W

F2 - Processing parameters  
 SI 65536  
 SF 400.1300101 MHz  
 WDW EM  
 SSB 0  
 LB 0.30 Hz  
 GB 0  
 PC 1.00

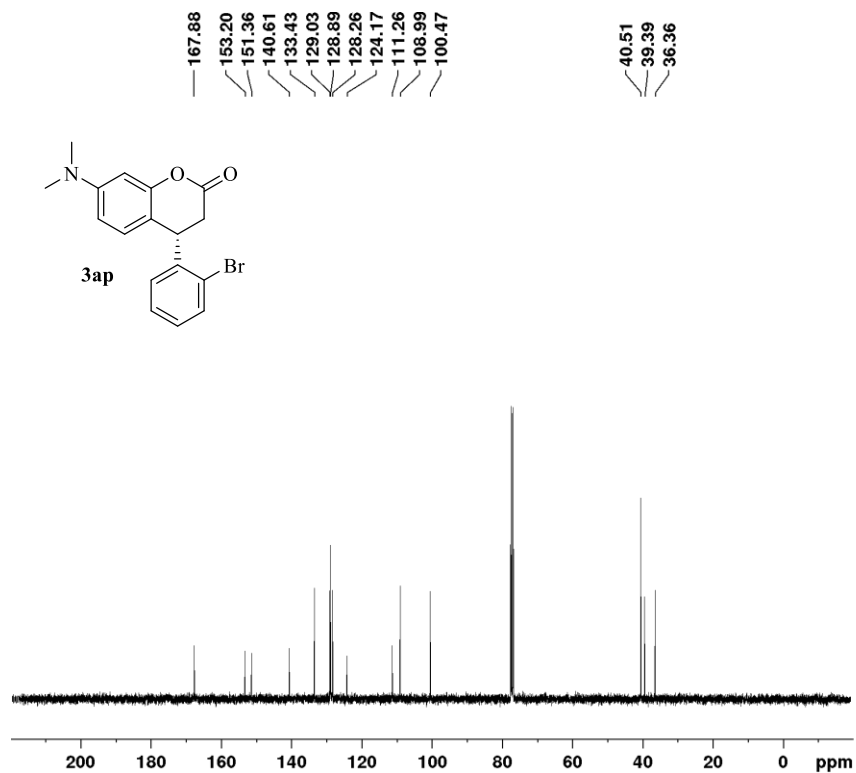

Current Data Parameters  
 NAME GYY  
 EXPNO 89  
 PROCNO 1

F2 - Acquisition Parameters  
 Date\_ 20220715  
 Time 17.45  
 INSTRUM spect  
 PROBHD 5 mm PABBO BB/  
 PULPROG zgpg30  
 TD 65536  
 SOLVENT CDCl3  
 NS 128  
 DS 4  
 SWH 24038.461 Hz  
 FIDRES 0.366798 Hz  
 AQ 1.3631488 sec  
 RG 213.76  
 DW 20.800 usec  
 DE 6.50 usec  
 TE 297.3 K  
 D1 2.00000000 sec  
 D11 0.03000000 sec  
 TD0 1

===== CHANNEL f1 =====  
 SFO1 100.6228293 MHz  
 NUC1 13C  
 P1 10.15 usec  
 PLW1 76.00000000 W

===== CHANNEL f2 =====  
 SFO2 400.1316005 MHz  
 NUC2 1H  
 CPDPRG[2] waltz16  
 PCPD2 80.00 usec  
 PLW2 16.00000000 W  
 PLW12 0.23184000 W  
 PLW13 0.14838000 W

F2 - Processing parameters  
 SI 32768  
 SF 100.6127585 MHz  
 WDW EM  
 SSB 0  
 LB 1.00 Hz  
 GB 0  
 PC 1.40

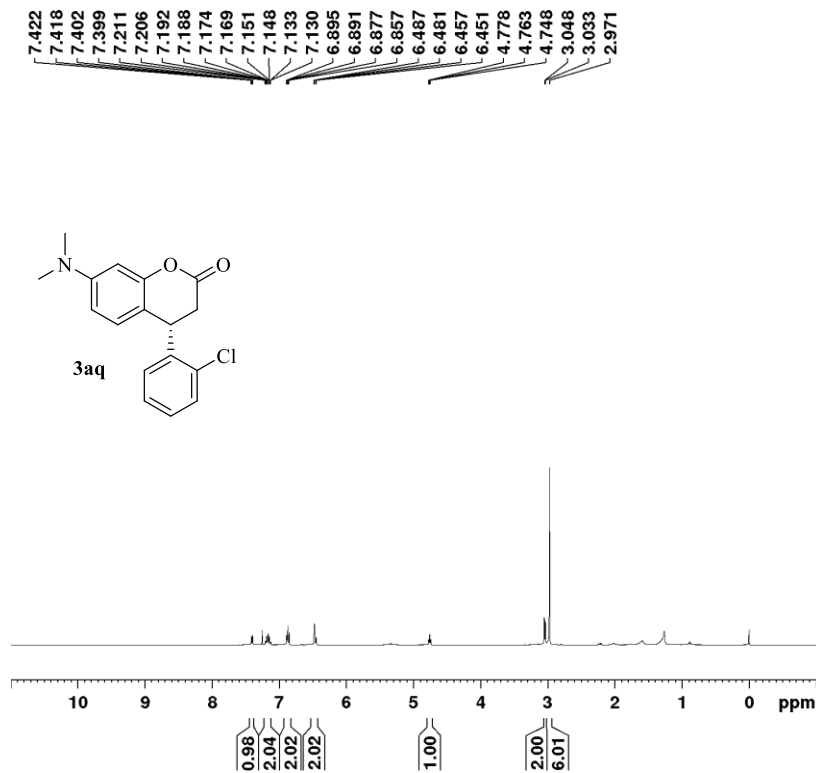

Current Data Parameters  
 NAME GYY  
 EXPNO 166  
 PROCNO 1

F2 - Acquisition Parameters  
 Date\_ 20220912  
 Time 11.05  
 INSTRUM spect  
 PROBHD 5 mm PABBO BB/  
 PULPROG zg30  
 TD 65536  
 SOLVENT CDCl3  
 NS 16  
 DS 2  
 SWH 8012.820 Hz  
 FIDRES 0.122266 Hz  
 AQ 4.0894465 sec  
 RG 134.75  
 DW 62.400 usec  
 DE 6.50 usec  
 TE 298.2 K  
 D1 1.00000000 sec  
 D11 0 sec  
 TD0 1

===== CHANNEL f1 =====  
 SFO1 400.1324710 MHz  
 NUC1 1H  
 P1 9.63 usec  
 PLW1 16.00000000 W

===== CHANNEL f2 =====  
 SFO2 400.1324710 MHz  
 NUC2 off  
 CPDPRG[2]  
 PCPD2 0 usec  
 PLW2 0 W  
 PLW12 0 W  
 PLW13 0 W

F2 - Processing parameters  
 SI 65536  
 SF 400.1300103 MHz  
 WDW EM  
 SSB 0  
 LB 0.30 Hz  
 GB 0  
 PC 1.00

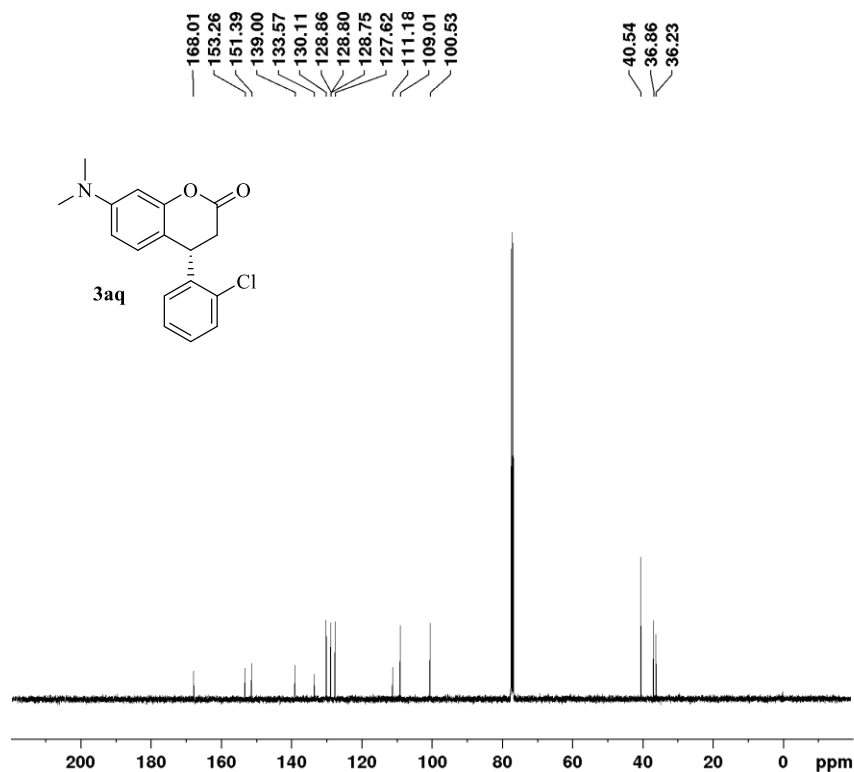

Current Data Parameters  
 NAME GYY  
 EXPNO 148  
 PROCNO 1

F2 - Acquisition Parameters  
 Date\_ 20220804  
 Time 20.07  
 INSTRUM spect  
 PROBHD 5 mm PABBO BB/  
 PULPROG zgpg30  
 TD 65536  
 SOLVENT CDCl3  
 NS 395  
 DS 4  
 SWH 24038.461 Hz  
 FIDRES 0.366798 Hz  
 AQ 1.3631488 sec  
 RG 213.76  
 DW 20.800 usec  
 DE 6.50 usec  
 TE 297.7 K  
 D1 2.00000000 sec  
 D11 0.03000000 sec  
 TD0 1

===== CHANNEL f1 =====  
 SFO1 100.6228293 MHz  
 NUC1 13C  
 P1 10.15 usec  
 PLW1 76.00000000 W

===== CHANNEL f2 =====  
 SFO2 400.1316005 MHz  
 NUC2 1H  
 CPDPRG[2] waitz16  
 PCPD2 80.00 usec  
 PLW2 16.00000000 W  
 PLW12 0.23184000 W  
 PLW13 0.14838000 W

F2 - Processing parameters  
 SI 32768  
 SF 100.6127556 MHz  
 WDW EM  
 SSB 0  
 LB 1.00 Hz  
 GB 0  
 PC 1.40



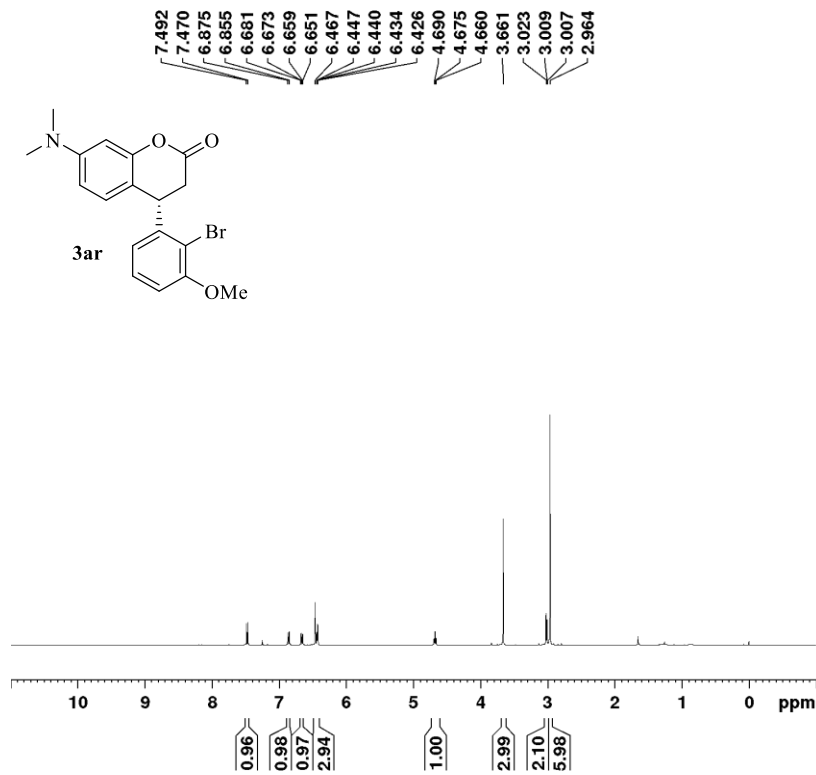

```

Current Data Parameters
NAME          GYY
EXPNO         45
PROCNO        1

F2 - Acquisition Parameters
Date_         20220621
Time          10.10
INSTRUM       spect
PROBHD        5 mm PABBO BB/
PULPROG       zg30
TD            65536
SOLVENT       CDCl3
NS            8
DS            2
SWH           8012.820 Hz
FIDRES        0.122266 Hz
AQ            4.0894465 sec
RG            58.51
DW            62.400 usec
DE            6.50 usec
TE            296.6 K
D1            1.00000000 sec
D11           0 sec
TD0           1

===== CHANNEL f1 =====
SFO1          400.1324710 MHz
NUC1          1H
P1            9.63 usec
PLW1          16.00000000 W

===== CHANNEL f2 =====
SFO2          400.1324710 MHz
NUC2          off
CPDPRG[2]
PCPD2         0 usec
PLW2          0 W
PLW12         0 W
PLW13         0 W

F2 - Processing parameters
SI            65536
SF            400.1300098 MHz
WDW           EM
SSB           0
LB            0.30 Hz
GB            0
PC            1.00

```

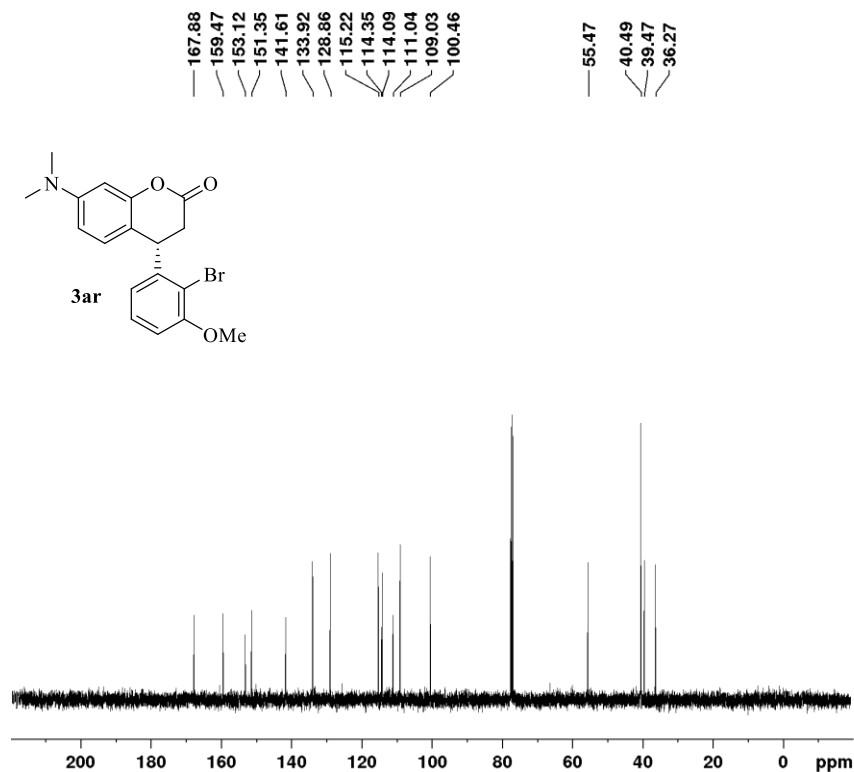

```

Current Data Parameters
NAME          GYY
EXPNO         46
PROCNO        1

F2 - Acquisition Parameters
Date_         20220621
Time          10.12
INSTRUM       spect
PROBHD        5 mm PABBO BB/
PULPROG       zgpg30
TD            65536
SOLVENT       CDCl3
NS            12
DS            4
SWH           24038.461 Hz
FIDRES        0.366798 Hz
AQ            1.3631488 sec
RG            213.76
DW            20.800 usec
DE            6.50 usec
TE            296.9 K
D1            2.00000000 sec
D11           0.03000000 sec
TD0           1

===== CHANNEL f1 =====
SFO1          100.6228293 MHz
NUC1          13C
P1            10.15 usec
PLW1          76.00000000 W

===== CHANNEL f2 =====
SFO2          400.1316005 MHz
NUC2          1H
CPDPRG[2]     waltz16
PCPD2         80.00 usec
PLW2          16.00000000 W
PLW12         0.23184000 W
PLW13         0.14838000 W

F2 - Processing parameters
SI            32768
SF            100.6127611 MHz
WDW           EM
SSB           0
LB            1.00 Hz
GB            0
PC            1.40

```

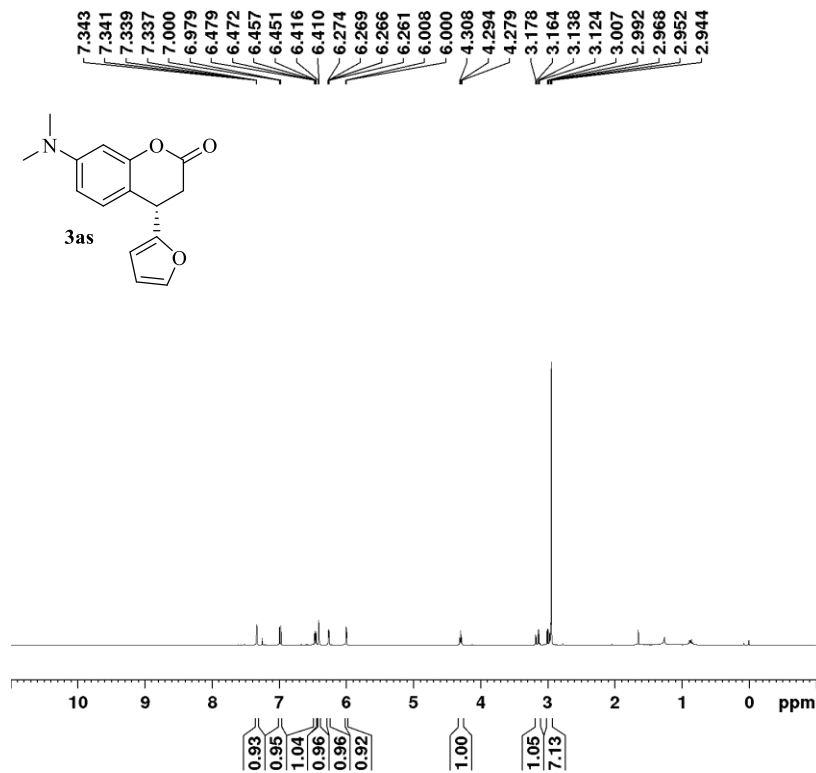

```

Current Data Parameters
NAME          GYY
EXPNO         59
PROCNO        1

F2 - Acquisition Parameters
Date_         20220628
Time          9.59
INSTRUM       spect
PROBHD        5 mm PABBO BB/
PULPROG       zg30
TD            65536
SOLVENT       CDCl3
NS            5
DS            2
SWH           8012.820 Hz
FIDRES        0.122266 Hz
AQ            4.0894465 sec
RG            63.52
DW            62.400 usec
DE            6.50 usec
TE            295.9 K
D1            1.00000000 sec
D11           0 sec
TD0           1

===== CHANNEL f1 =====
SFO1          400.1324710 MHz
NUC1          1H
P1            9.63 usec
PLW1          16.00000000 W

===== CHANNEL f2 =====
SFO2          400.1324710 MHz
NUC2          off
CPDPRG[2]
PCPD2         0 usec
PLW2          0 W
PLW12         0 W
PLW13         0 W

F2 - Processing parameters
SI            65536
SF            400.1300099 MHz
WDW           EM
SSB           0
LB            0.30 Hz
GB            0
PC            1.00

```

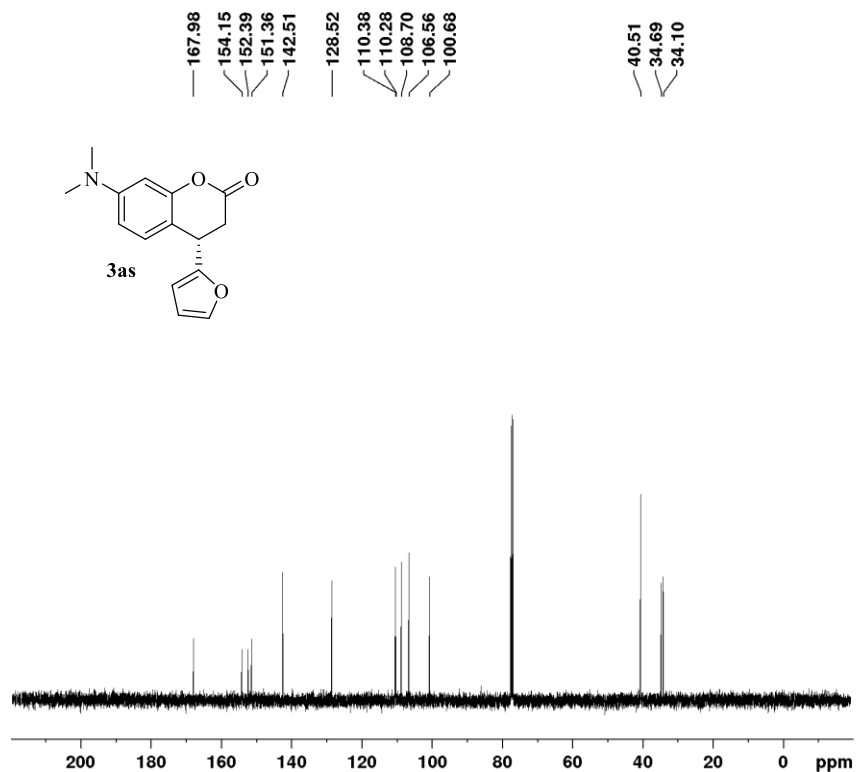

```

Current Data Parameters
NAME          GYY
EXPNO         60
PROCNO        1

F2 - Acquisition Parameters
Date_         20220628
Time          10.00
INSTRUM       spect
PROBHD        5 mm PABBO BB/
PULPROG       zgpg30
TD            65536
SOLVENT       CDCl3
NS            21
DS            4
SWH           24038.461 Hz
FIDRES        0.366798 Hz
AQ            1.3631488 sec
RG            213.76
DW            20.800 usec
DE            6.50 usec
TE            296.1 K
D1            2.00000000 sec
D11           0.03000000 sec
TD0           1

===== CHANNEL f1 =====
SFO1          100.6228293 MHz
NUC1          13C
P1            10.15 usec
PLW1          76.00000000 W

===== CHANNEL f2 =====
SFO2          400.1316005 MHz
NUC2          1H
CPDPRG[2]     waitz16
PCPD2         80.00 usec
PLW2          16.00000000 W
PLW12         0.23184000 W
PLW13         0.14838000 W

F2 - Processing parameters
SI            32768
SF            100.6127593 MHz
WDW           EM
SSB           0
LB            1.00 Hz
GB            0
PC            1.40

```

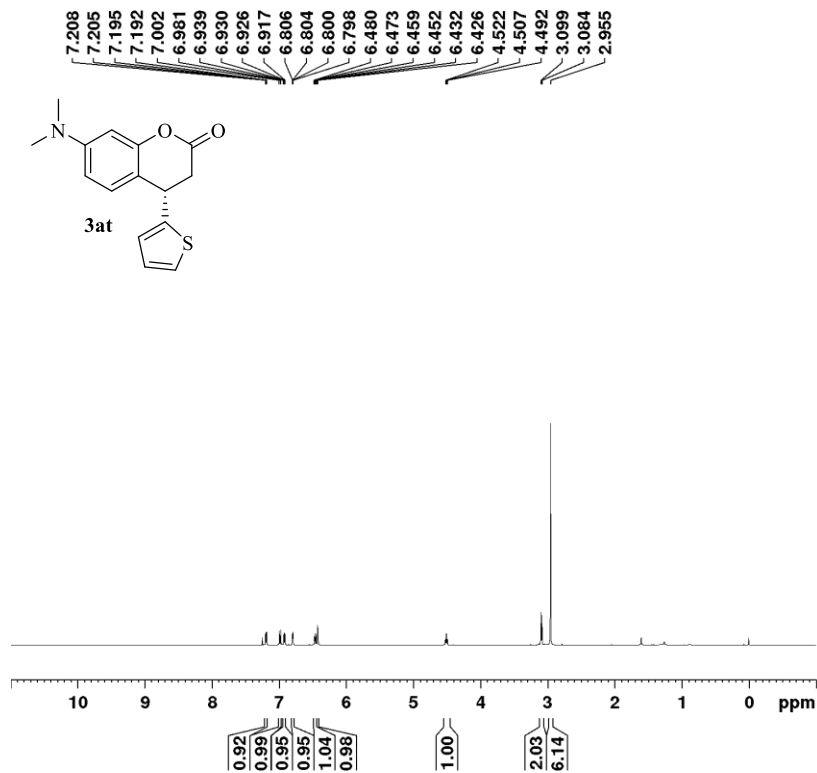

Current Data Parameters  
NAME GY  
EXPNO 222  
PROCNO 1

F2 - Acquisition Parameters  
Date\_ 20221006  
Time 15.18  
INSTRUM spect  
PROBHD 5 mm PABBO BB/  
PULPROG zg30  
TD 65536  
SOLVENT CDCl3  
NS 6  
DS 2  
SWH 8012.820 Hz  
FIDRES 0.122266 Hz  
AQ 4.0894465 sec  
RG 94.53  
DW 62.400 usec  
DE 6.50 usec  
TE 297.0 K  
D1 1.00000000 sec  
TDO 1

===== CHANNEL f1 =====  
SF01 400.1324710 MHz  
NUC1 1H  
F1 9.63 usec  
PLW1 16.00000000 W

F2 - Processing parameters  
SI 65536  
SF 400.1300100 MHz  
WDW EM  
SSB 0  
LB 0.30 Hz  
GB 0  
PC 1.00

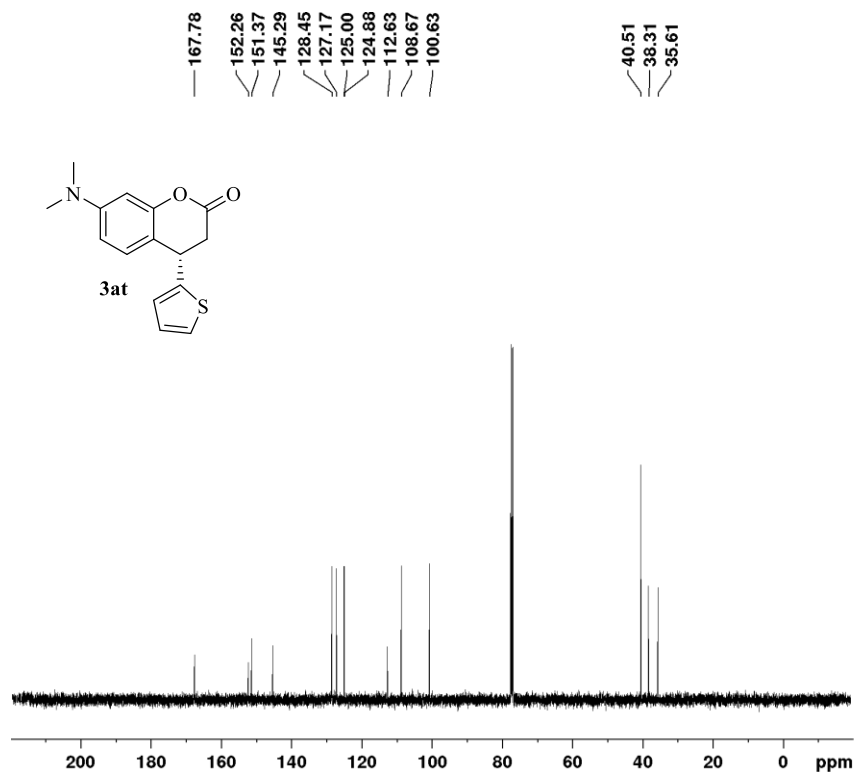

Current Data Parameters  
NAME GY  
EXPNO 223  
PROCNO 1

F2 - Acquisition Parameters  
Date\_ 20221006  
Time 15.22  
INSTRUM spect  
PROBHD 5 mm PABBO BB/  
PULPROG zgpg30  
TD 65536  
SOLVENT CDCl3  
NS 47  
DS 4  
SWH 24038.461 Hz  
FIDRES 0.366798 Hz  
AQ 1.3631488 sec  
RG 213.76  
DW 20.800 usec  
DE 6.50 usec  
TE 297.6 K  
D1 2.00000000 sec  
D11 0.03000000 sec  
TDO 1

===== CHANNEL f1 =====  
SF01 100.6228293 MHz  
NUC1 13C  
F1 10.15 usec  
PLW1 76.00000000 W

===== CHANNEL f2 =====  
SF02 400.1316005 MHz  
NUC2 1H  
CPDPRG[2] waltz16  
PCPD2 80.00 usec  
PLW2 16.00000000 W  
PLW12 0.23184000 W  
PLW13 0.14838000 W

F2 - Processing parameters  
SI 32768  
SF 100.6127585 MHz  
WDW EM  
SSB 0  
LB 1.00 Hz  
GB 0  
PC 1.40

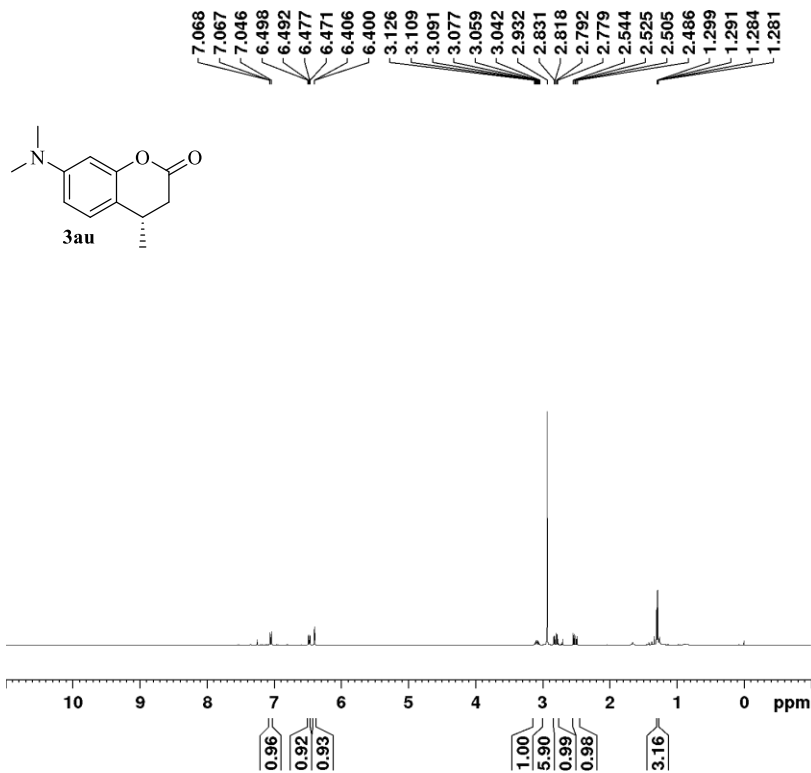

Current Data Parameters  
NAME GYY  
EXPNO 171  
PROCNO 1

F2 - Acquisition Parameters  
Date\_ 20220916  
Time 16.40  
INSTRUM spect  
PROBHD 5 mm PABBO BB/  
PULPROG zg30  
TD 65536  
SOLVENT CDCl3  
NS 16  
DS 2  
SWH 8012.820 Hz  
FIDRES 0.122266 Hz  
AQ 4.0894465 sec  
RG 63.52  
DW 62.400 usec  
DE 6.50 usec  
TE 298.9 K  
D1 1.0000000 sec  
D11 0 sec  
TDO 1

===== CHANNEL f1 =====  
SFO1 400.1324710 MHz  
NUC1 1H  
P1 9.63 usec  
PLW1 16.0000000 W

===== CHANNEL f2 =====  
SFO2 400.1324710 MHz  
NUC2 off  
CPDPRG[2]  
PCPD2 0 usec  
PLW2 0 W  
PLW12 0 W  
PLW13 0 W

F2 - Processing parameters  
SI 65536  
SF 400.1300100 MHz  
WDW EM  
SSB 0  
LB 0.30 Hz  
GB 0  
PC 1.00

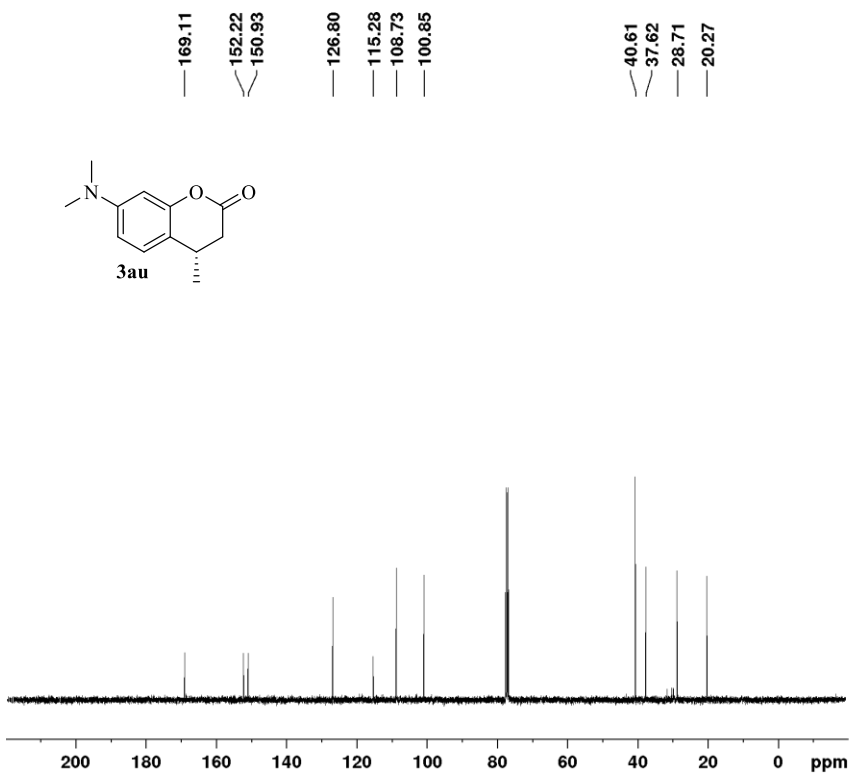

Current Data Parameters  
NAME GYY  
EXPNO 172  
PROCNO 1

F2 - Acquisition Parameters  
Date\_ 20220916  
Time 16.45  
INSTRUM spect  
PROBHD 5 mm PABBO BB/  
PULPROG zgpg30  
TD 65536  
SOLVENT CDCl3  
NS 67  
DS 4  
SWH 24038.461 Hz  
FIDRES 0.366798 Hz  
AQ 1.3631488 sec  
RG 213.76  
DW 20.800 usec  
DE 6.50 usec  
TE 299.2 K  
D1 2.0000000 sec  
D11 0.0300000 sec  
TDO 1

===== CHANNEL f1 =====  
SFO1 100.6228293 MHz  
NUC1 13C  
P1 10.15 usec  
PLW1 76.0000000 W

===== CHANNEL f2 =====  
SFO2 400.1316005 MHz  
NUC2 1H  
CPDPRG[2] waitz16  
PCPD2 80.00 usec  
PLW2 16.0000000 W  
PLW12 0.23184000 W  
PLW13 0.14838000 W

F2 - Processing parameters  
SI 32768  
SF 100.6127585 MHz  
WDW EM  
SSB 0  
LB 1.00 Hz  
GB 0  
PC 1.40

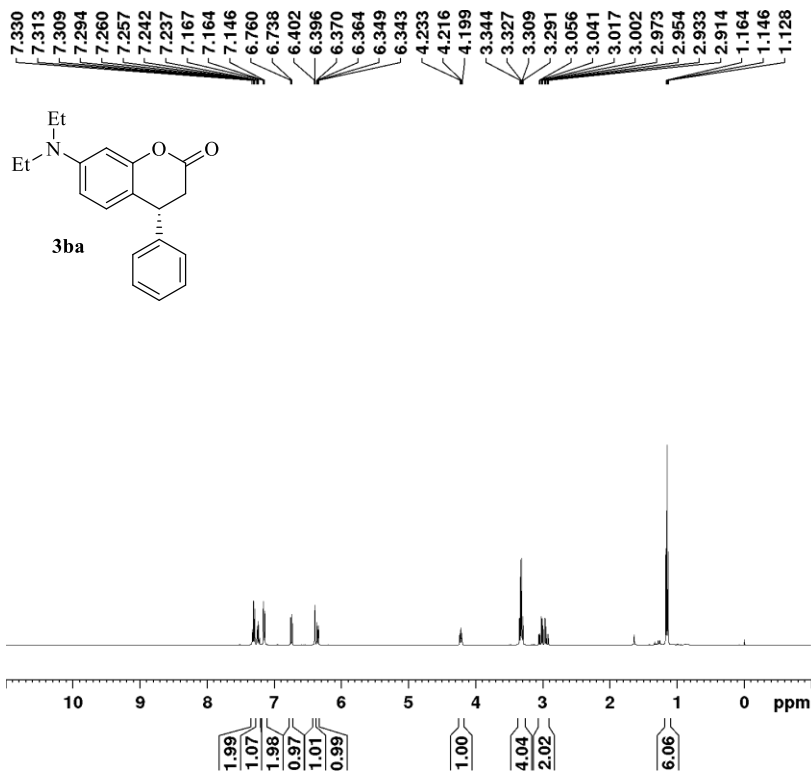

Current Data Parameters  
 NAME GYY  
 EXPNO 147  
 PROCNO 1

F2 - Acquisition Parameters  
 Date\_ 20220804  
 Time 17.45  
 INSTRUM spect  
 PROBHD 5 mm PABBO BB/  
 PULPROG zg30  
 TD 65536  
 SOLVENT CDCl3  
 NS 16  
 DS 2  
 SWH 8012.820 Hz  
 FIDRES 0.122266 Hz  
 AQ 4.0894465 sec  
 RG 31.77  
 DW 62.400 usec  
 DE 6.50 usec  
 TE 297.5 K  
 D1 1.00000000 sec  
 D11 0 sec  
 TD0 1

===== CHANNEL f1 =====  
 SFO1 400.1324710 MHz  
 NUC1 1H  
 P1 9.63 usec  
 PLW1 16.00000000 W

===== CHANNEL f2 =====  
 SFO2 400.1324710 MHz  
 NUC2 off  
 CPDPRG[2]  
 PCPD2 0 usec  
 PLW2 0 W  
 PLW12 0 W  
 PLW13 0 W

F2 - Processing parameters  
 SI 65536  
 SF 400.1300189 MHz  
 WDW EM  
 SSB 0  
 LB 0.30 Hz  
 GB 0  
 PC 1.00

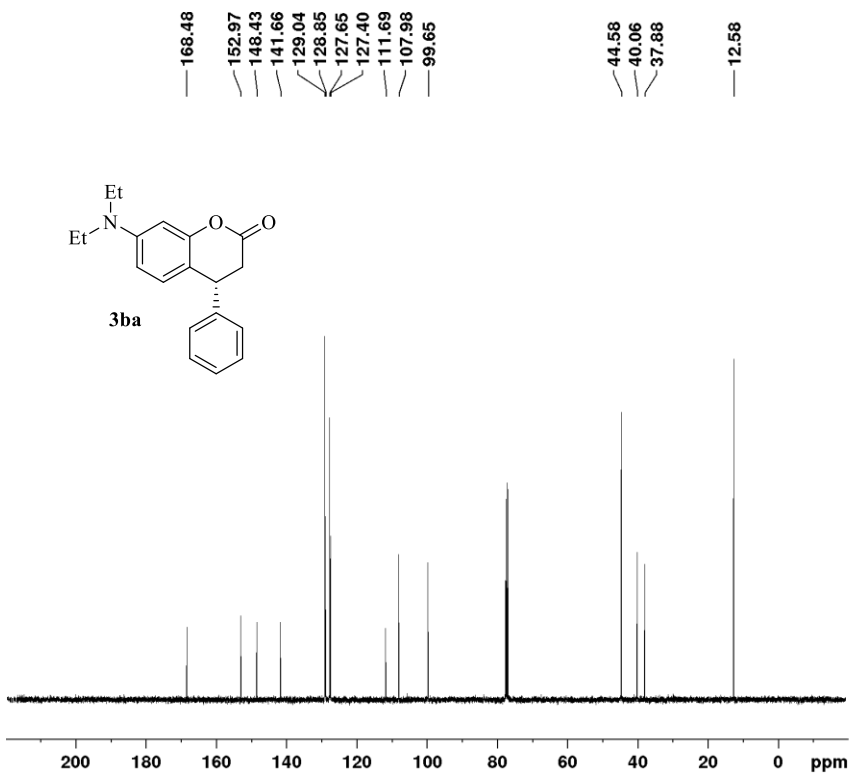

Current Data Parameters  
 NAME GYY  
 EXPNO 149  
 PROCNO 1

F2 - Acquisition Parameters  
 Date\_ 20220804  
 Time 20.37  
 INSTRUM spect  
 PROBHD 5 mm PABBO BB/  
 PULPROG zgpg30  
 TD 65536  
 SOLVENT CDCl3  
 NS 88  
 DS 4  
 SWH 24038.461 Hz  
 FIDRES 0.366798 Hz  
 AQ 1.3631488 sec  
 RG 213.76  
 DW 20.800 usec  
 DE 6.50 usec  
 TE 297.8 K  
 D1 2.00000000 sec  
 D11 0.03000000 sec  
 TD0 1

===== CHANNEL f1 =====  
 SFO1 100.6228293 MHz  
 NUC1 13C  
 P1 10.15 usec  
 PLW1 76.00000000 W

===== CHANNEL f2 =====  
 SFO2 400.1316005 MHz  
 NUC2 1H  
 CPDPRG[2] waitz16  
 PCPD2 80.00 usec  
 PLW2 16.00000000 W  
 PLW12 0.23184000 W  
 PLW13 0.14838000 W

F2 - Processing parameters  
 SI 32768  
 SF 100.6127615 MHz  
 WDW EM  
 SSB 0  
 LB 1.00 Hz  
 GB 0  
 PC 1.40

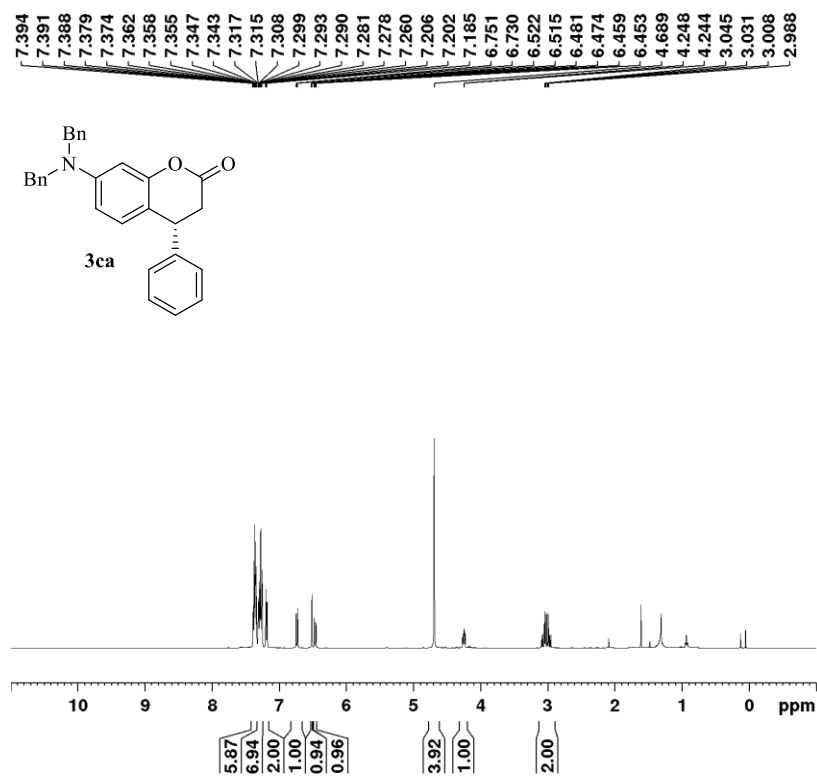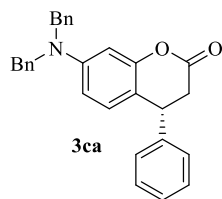

Current Data Parameters  
NAME gyy-sq  
EXPNO 213  
PROCNO 1

F2 - Acquisition Parameters  
Date\_ 20220928  
Time 17.38  
INSTRUM spect  
PROBHD 5 mm PABBO BB/  
PULPROG zg30  
TD 65536  
SOLVENT CDCl3  
NS 12  
DS 2  
SWH 8012.820 Hz  
FIDRES 0.122266 Hz  
AQ 4.0894465 sec  
RG 71.56  
DW 62.400 usec  
DE 6.50 usec  
TE 298.1 K  
D1 1.00000000 sec  
D11 0 sec  
TDO 1

===== CHANNEL f1 =====  
SFO1 400.1324710 MHz  
NUC1 1H  
P1 9.63 usec  
PLW1 16.00000000 W

===== CHANNEL f2 =====  
SFO2 400.1324710 MHz  
NUC2 off  
CPDPRG2  
PCPD2 0 usec  
PLW2 0 W  
PLW12 0 W  
PLW13 0 W

F2 - Processing parameters  
SI 6536  
SF 400.1299981 MHz  
WDW EM  
SSB 0  
LB 0.30 Hz  
GB 0  
PC 1.00

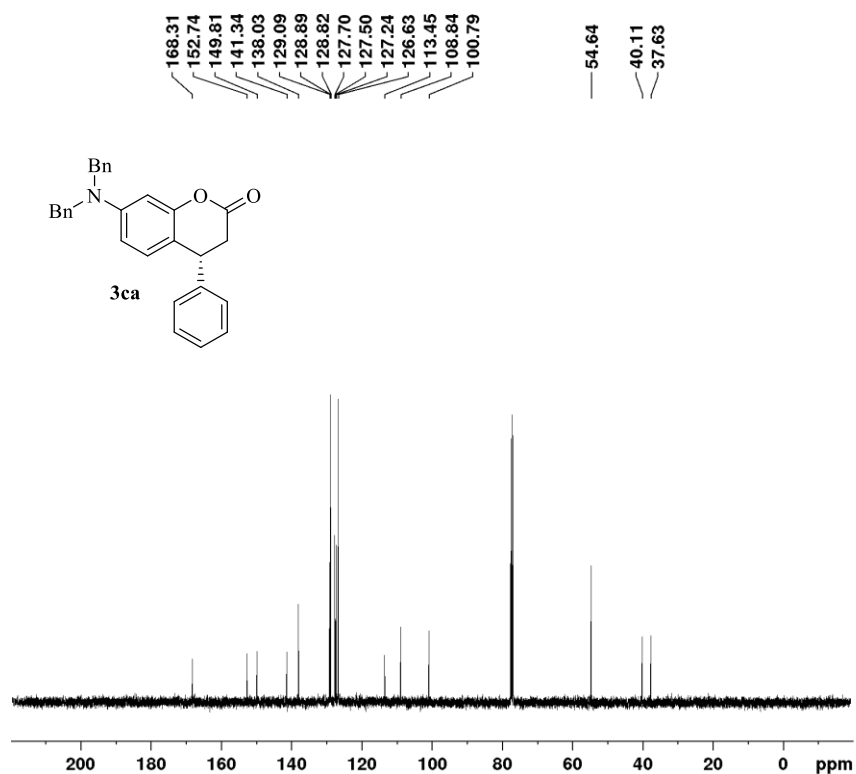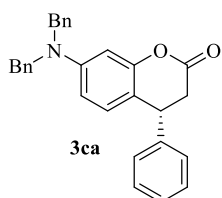

Current Data Parameters  
NAME GYY  
EXPNO 214  
PROCNO 1

F2 - Acquisition Parameters  
Date\_ 20220928  
Time 17.40  
INSTRUM spect  
PROBHD 5 mm PABBO BB/  
PULPROG zgpg30  
TD 65536  
SOLVENT CDCl3  
NS 47  
DS 4  
SWH 24038.461 Hz  
FIDRES 0.366798 Hz  
AQ 1.3631488 sec  
RG 213.76  
DW 20.800 usec  
DE 6.50 usec  
TE 298.5 K  
D1 2.00000000 sec  
D11 0.03000000 sec  
TDO 1

===== CHANNEL f1 =====  
SFO1 100.6228293 MHz  
NUC1 13C  
P1 10.15 usec  
PLW1 76.00000000 W

===== CHANNEL f2 =====  
SFO2 400.1316005 MHz  
NUC2 1H  
CPDPRG2 waitz16  
PCPD2 80.00 usec  
PLW2 16.00000000 W  
PLW12 0.23184000 W  
PLW13 0.14838000 W

F2 - Processing parameters  
SI 32768  
SF 100.6127589 MHz  
WDW EM  
SSB 0  
LB 1.00 Hz  
GB 0  
PC 1.40

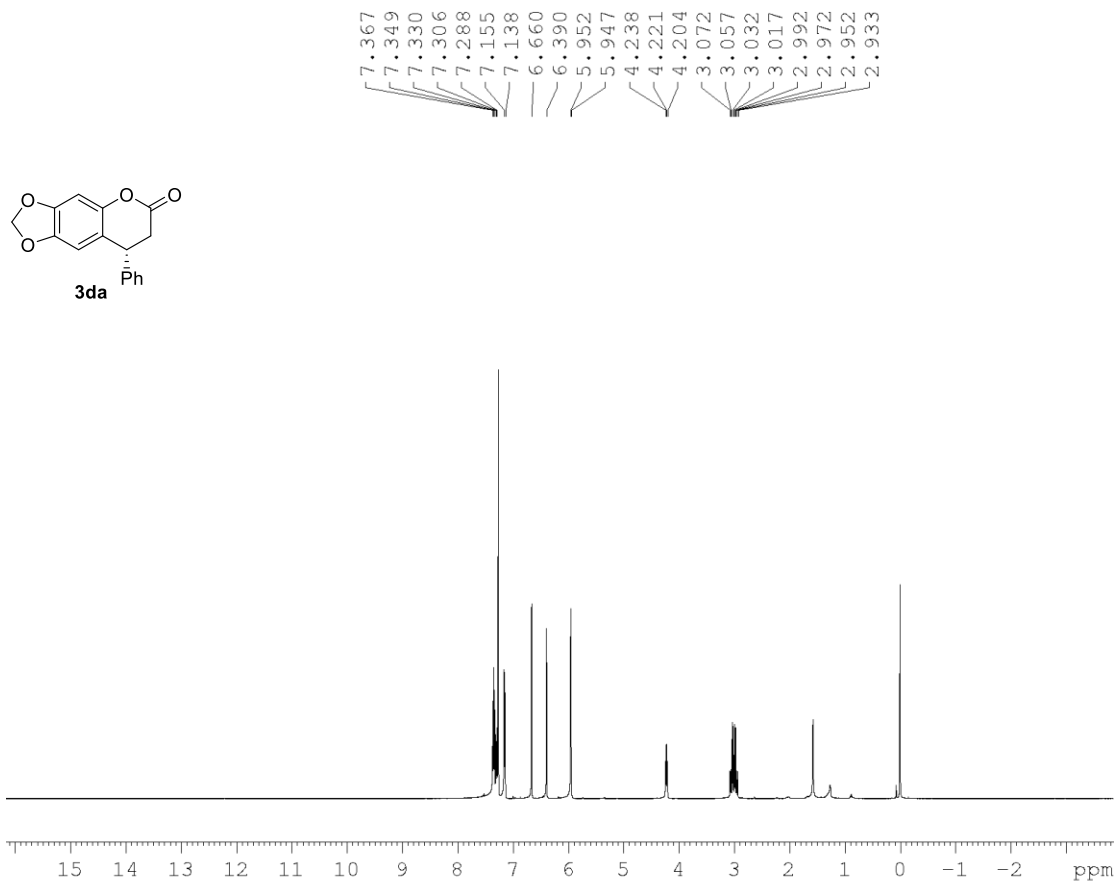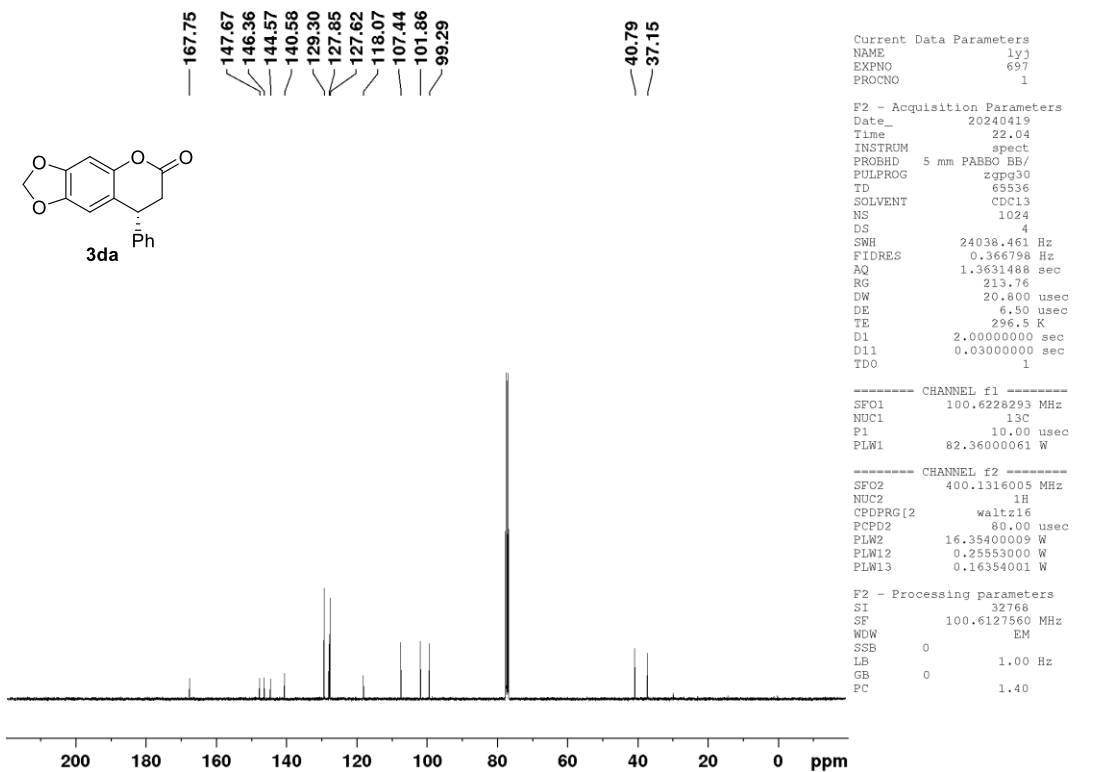

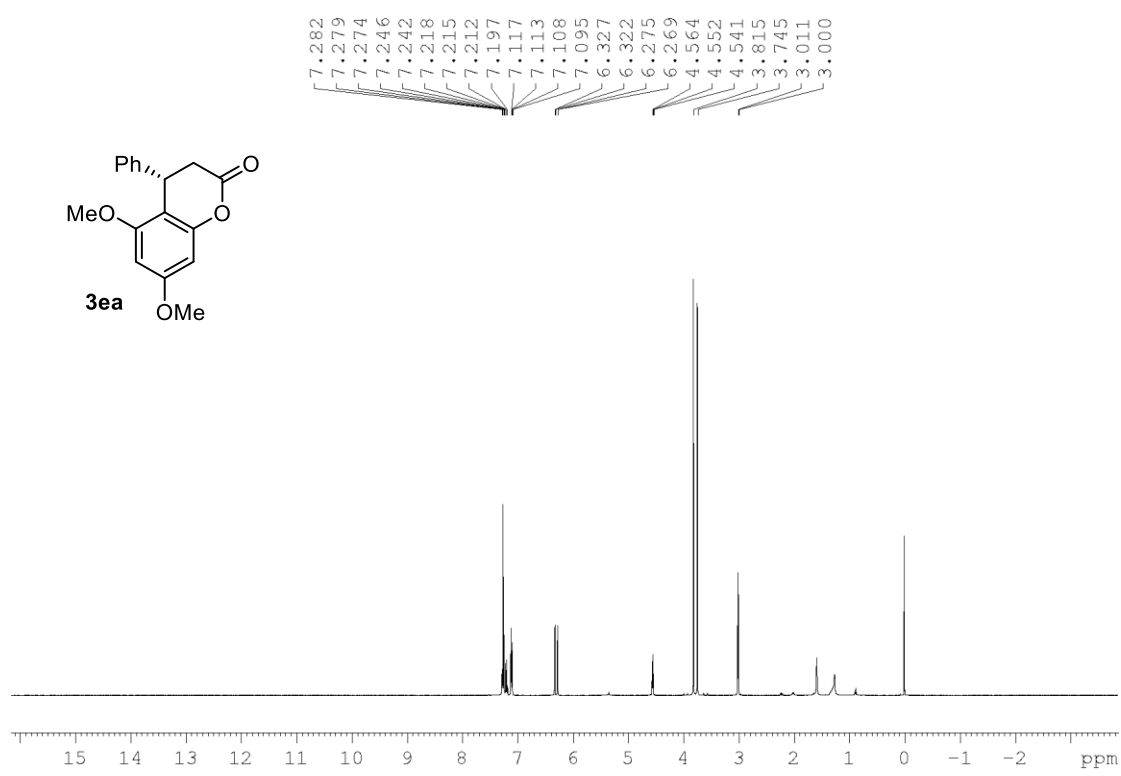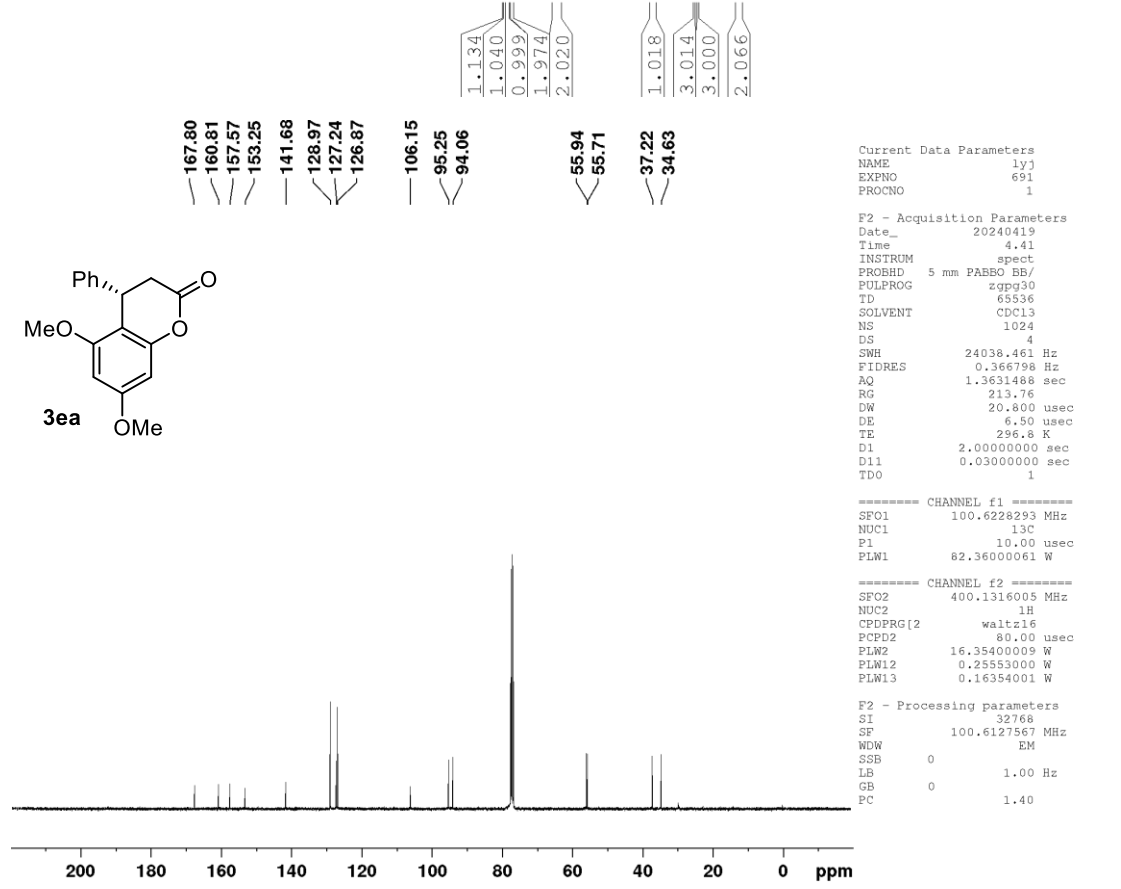

Current Data Parameters  
 NAME lyj  
 EXPNO 691  
 PROCNO 1

F2 - Acquisition Parameters  
 Date\_ 20240419  
 Time 4.41  
 INSTRUM spect  
 PROBHD 5 mm PABBO BB/  
 PULPROG zgpg30  
 TD 65536  
 SOLVENT CDCl3  
 NS 1024  
 DS 4  
 SWH 24038.461 Hz  
 FIDRES 0.366798 Hz  
 AQ 1.3631488 sec  
 RG 213.76  
 DW 20.800 usec  
 DE 6.50 usec  
 TE 296.8 K  
 D1 2.0000000 sec  
 D11 0.0300000 sec  
 TDO 1

===== CHANNEL f1 =====  
 SFO1 100.6228293 MHz  
 NUC1 13C  
 P1 10.00 usec  
 PLW1 62.3600061 W

===== CHANNEL f2 =====  
 SFO2 400.1316005 MHz  
 NUC2 1H  
 CPDPRG[2] waltz16  
 PCPD2 80.00 usec  
 PLW2 16.35400009 W  
 PLW12 0.25553000 W  
 PLW13 0.16354001 W

F2 - Processing parameters  
 SI 32768  
 SF 100.6127567 MHz  
 WDW EM  
 SSB 0  
 LB 1.00 Hz  
 GB 0  
 PC 1.40



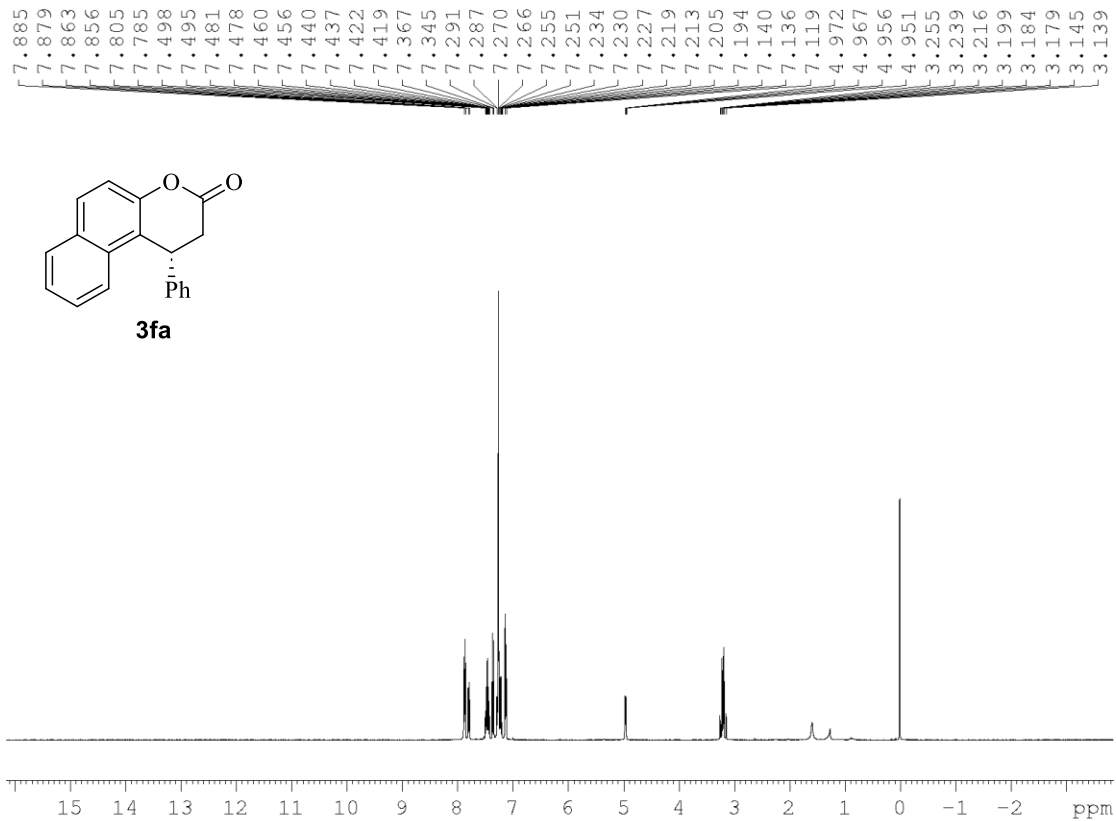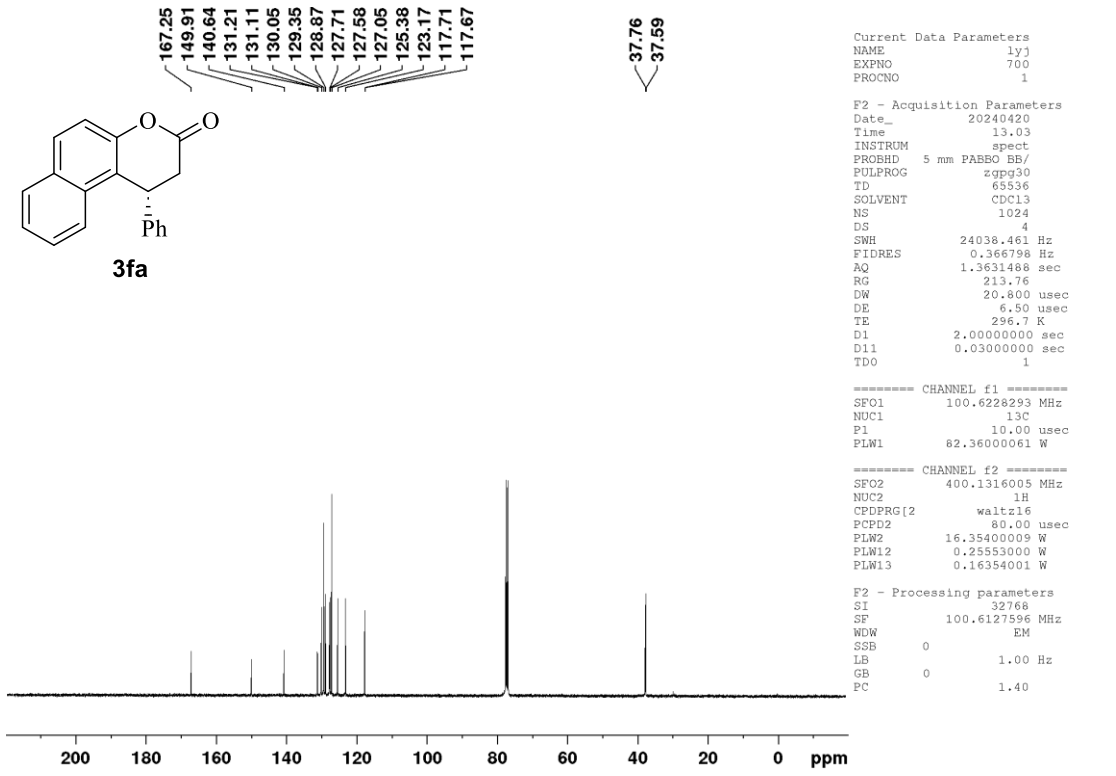

Current Data Parameters

NAME lyj  
 EXPNO 700  
 PROCNO 1

F2 - Acquisition Parameters

Date\_ 20240420  
 Time 13.03  
 INSTRUM spect  
 PROBHD 5 mm PABBO BB/  
 PULPROG zgpg30  
 TD 65536  
 SOLVENT CDCl3  
 NS 1024  
 DS 4  
 SWH 24038.461 Hz  
 FIDRES 0.366798 Hz  
 AQ 1.3631488 sec  
 RG 213.76  
 DW 20.800 usec  
 DE 6.50 usec  
 TE 296.7 K  
 D1 2.0000000 sec  
 D11 0.0300000 sec  
 TDO 1

===== CHANNEL f1 =====

SFO1 100.6228293 MHz  
 NUC1 13C  
 P1 10.00 usec  
 PLW1 62.3600061 W

===== CHANNEL f2 =====

SFO2 400.1316005 MHz  
 NUC2 1H  
 CPDPRG[2] waltz16  
 PCPD2 80.00 usec  
 PLW2 16.35400009 W  
 PLW12 0.25553000 W  
 PLW13 0.16354001 W

F2 - Processing parameters

SI 32768  
 SF 100.6127596 MHz  
 WDW EM  
 SSB 0  
 LB 1.00 Hz  
 GB 0  
 PC 1.40

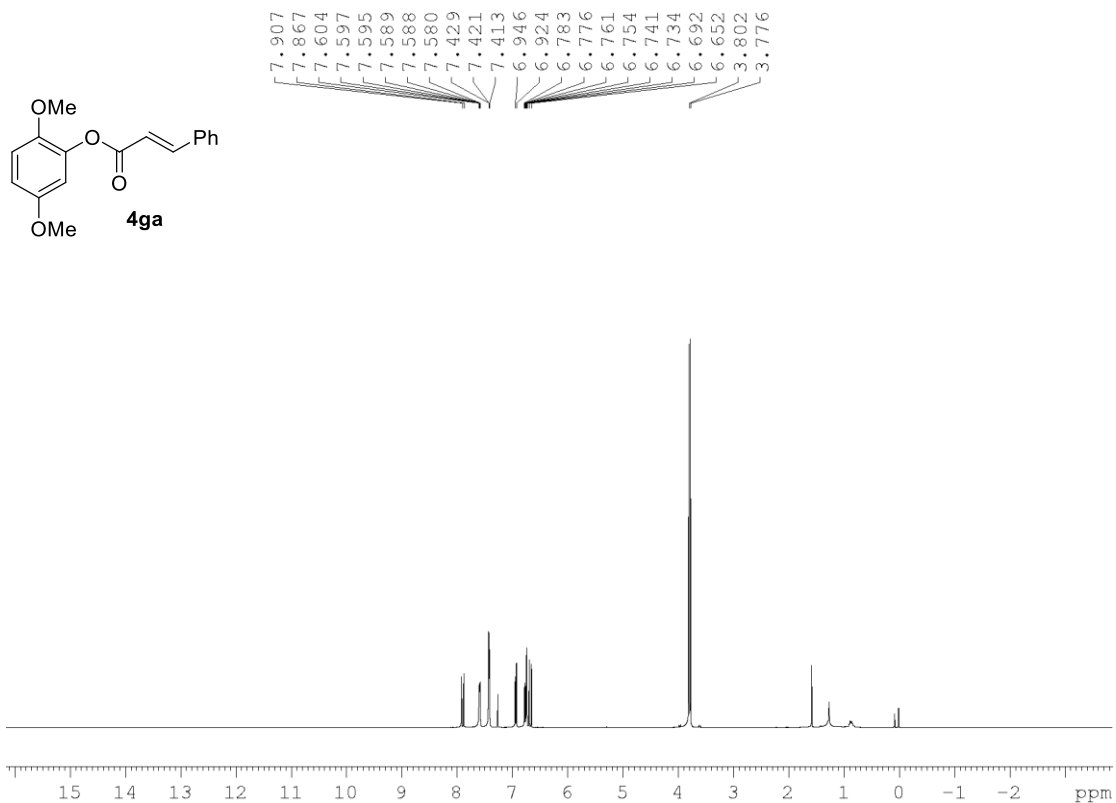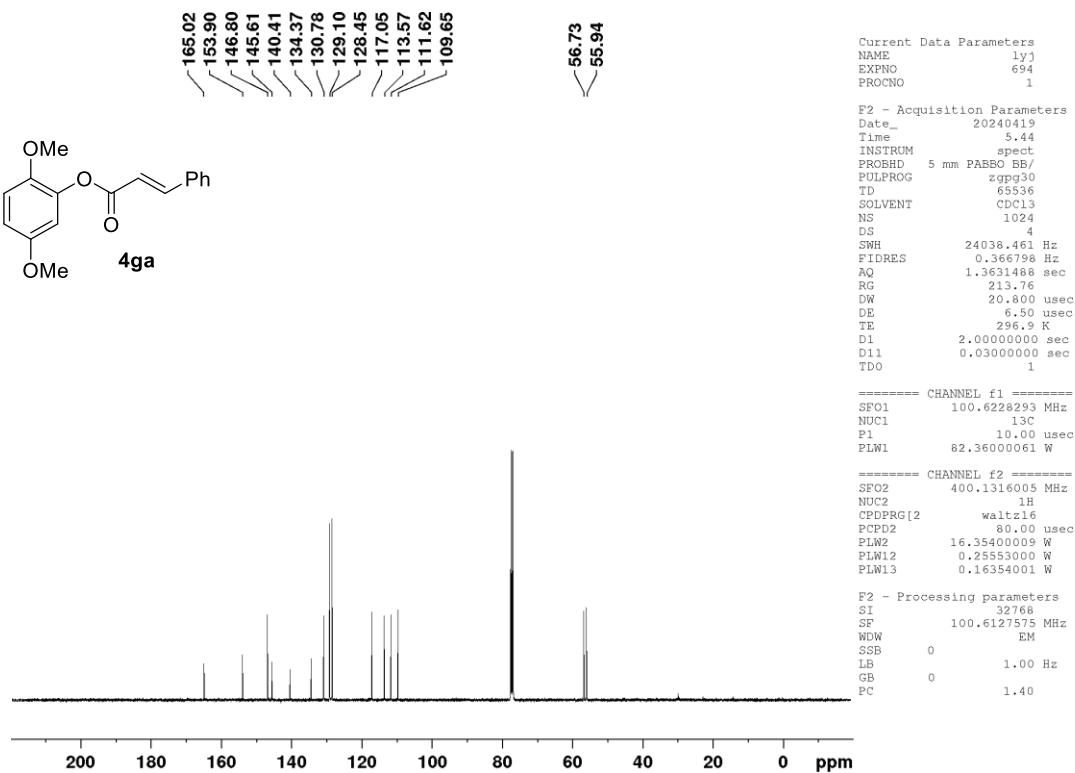

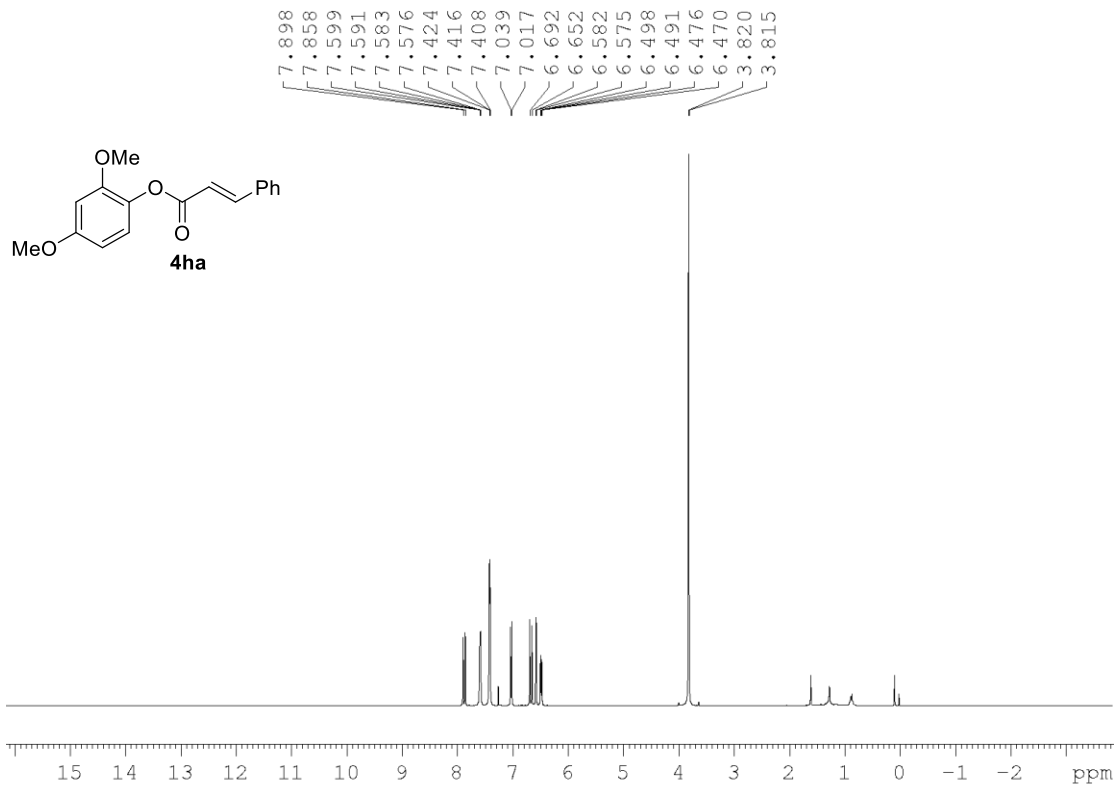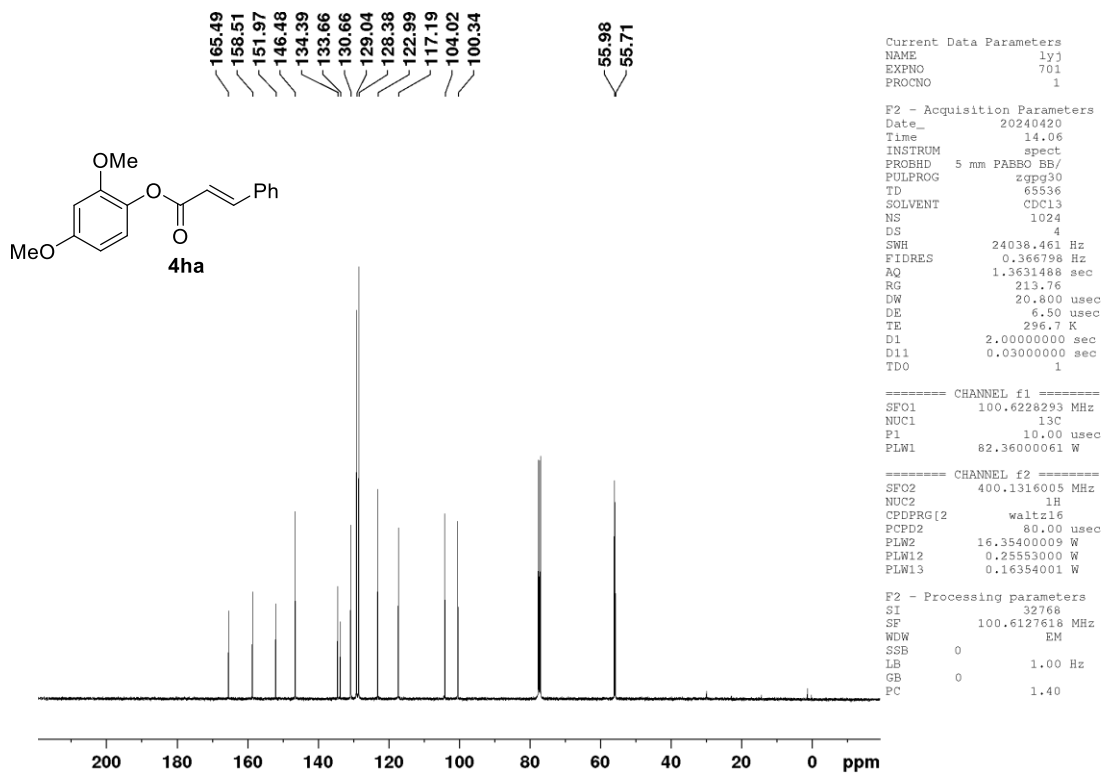

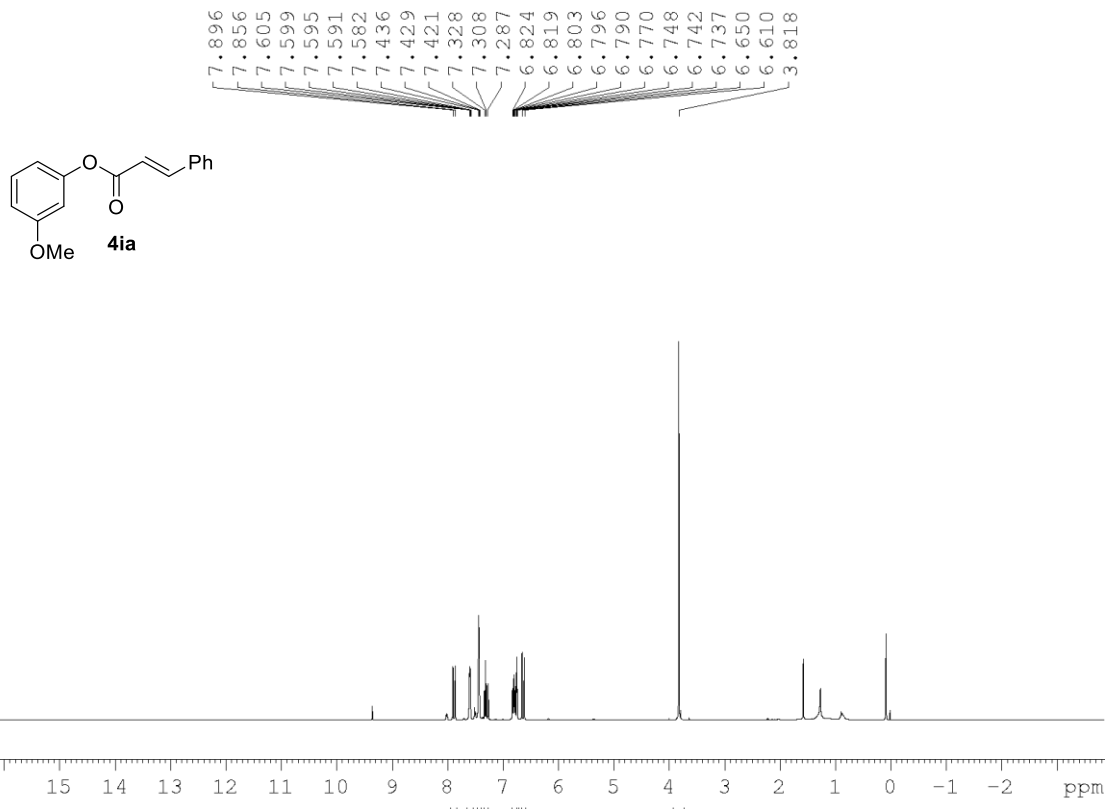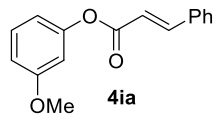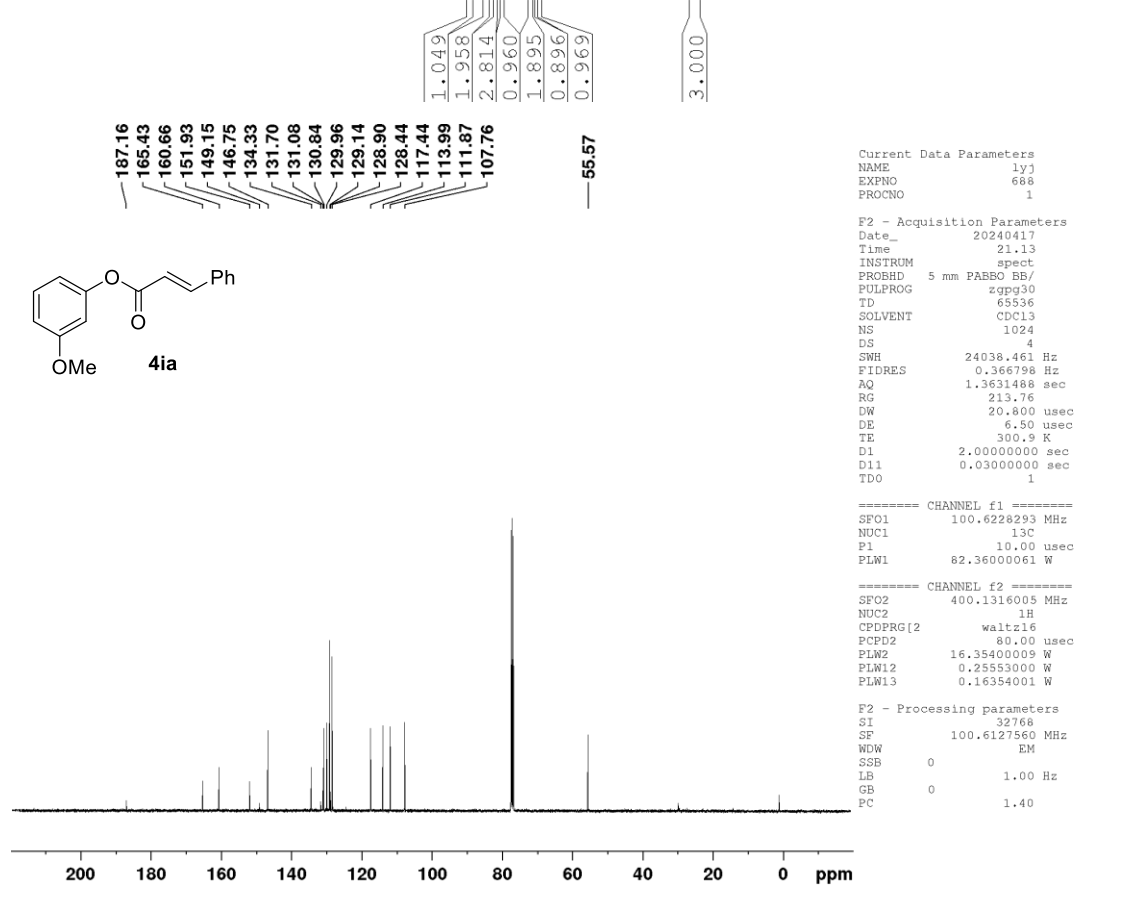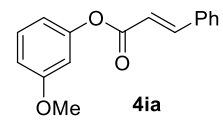

Current Data Parameters  
 NAME lyj  
 EXPNO 688  
 PROCNO 1

F2 - Acquisition Parameters  
 Date\_ 20240417  
 Time 21.13  
 INSTRUM spect  
 PROBHD 5 mm PABBO BB/  
 PULPROG zgpg30  
 TD 65536  
 SOLVENT CDCl3  
 NS 1024  
 DS 4  
 SWH 24038.461 Hz  
 FIDRES 0.366798 Hz  
 AQ 1.3631488 sec  
 RG 213.76  
 DW 20.800 usec  
 DE 6.50 usec  
 TE 300.9 K  
 D1 2.00000000 sec  
 D11 0.03000000 sec  
 TDO 1

==== CHANNEL f1 =====  
 SFO1 100.6228293 MHz  
 NUC1 13C  
 P1 10.00 usec  
 PLW1 82.36000061 W

==== CHANNEL f2 =====  
 SFO2 400.1316005 MHz  
 NUC2 1H  
 CPDPRG[2] waltz16  
 PCPDZ 80.00 usec  
 PLW2 16.35400009 W  
 PLW12 0.25553000 W  
 PLW13 0.16354001 W

F2 - Processing parameters  
 SI 32768  
 SF 100.6127560 MHz  
 WDW EM  
 SSB 0  
 LB 1.00 Hz  
 GB 0  
 PC 1.40

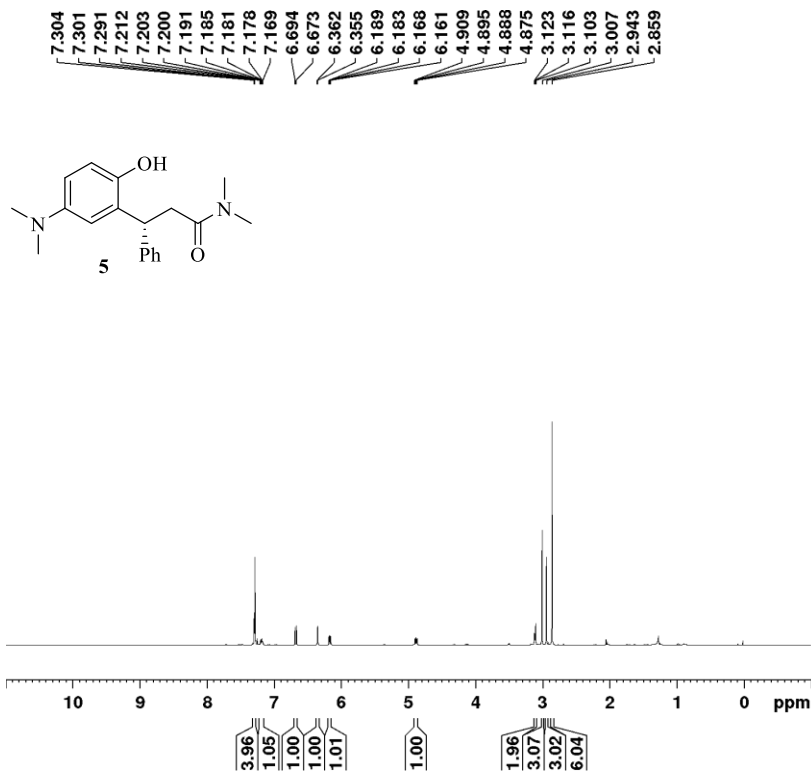

```

Current Data Parameters
NAME          GYY
EXPNO         215
PROCNO        1

F2 - Acquisition Parameters
Date_         20220928
Time          19.50
INSTRUM       spect
PROBHD        5 mm PABBO BB/
PULPROG       zg30
TD            65536
SOLVENT       CDCl3
NS            11
DS            2
SWH           8012.820 Hz
FIDRES        0.122266 Hz
AQ            4.0894465 sec
RG            31.77
DW            62.400 usec
DE            6.50 usec
TE            297.5 K
D1            1.00000000 sec
D11           0 sec
TD0           1

===== CHANNEL f1 =====
SFO1          400.1324710 MHz
NUC1          1H
P1            9.63 usec
PLW1          16.00000000 W

===== CHANNEL f2 =====
SFO2          400.1324710 MHz
NUC2          off
CPDPRG[2]
PCPD2         0 usec
PLW2          0 W
PLW12         0 W
PLW13         0 W

F2 - Processing parameters
SI            65536
SF            400.1300099 MHz
WDW           EM
SSB           0
LB            0.30 Hz
GB            0
PC            1.00
  
```

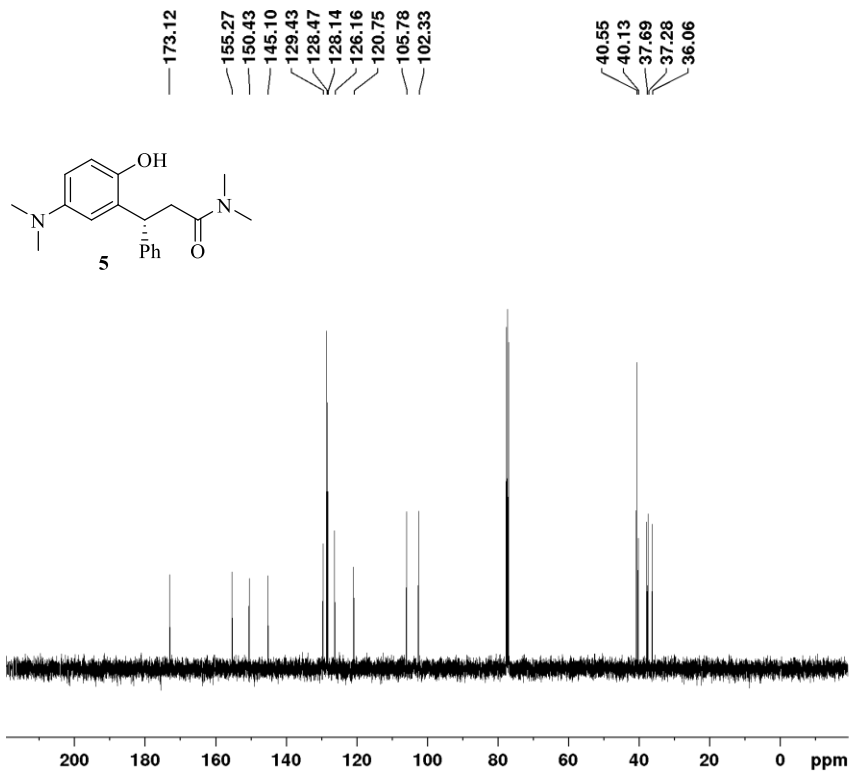

```

Current Data Parameters
NAME          GYY
EXPNO         216
PROCNO        1

F2 - Acquisition Parameters
Date_         20220928
Time          20.03
INSTRUM       spect
PROBHD        5 mm PABBO BB/
PULPROG       zgpg30
TD            65536
SOLVENT       CDCl3
NS            18
DS            4
SWH           24038.461 Hz
FIDRES        0.366798 Hz
AQ            1.3631488 sec
RG            213.76
DW            20.800 usec
DE            6.50 usec
TE            297.4 K
D1            2.00000000 sec
D11           0.03000000 sec
TD0           1

===== CHANNEL f1 =====
SFO1          100.6228293 MHz
NUC1          13C
P1            10.15 usec
PLW1          76.00000000 W

===== CHANNEL f2 =====
SFO2          400.1316005 MHz
NUC2          1H
CPDPRG[2]     waltz16
PCPD2         80.00 usec
PLW2          16.00000000 W
PLW12         0.23184000 W
PLW13         0.14838000 W

F2 - Processing parameters
SI            32768
SF            100.6127626 MHz
WDW           EM
SSB           0
LB            1.00 Hz
GB            0
PC            1.40
  
```

## 6. HPLC Charts of Chiral Products

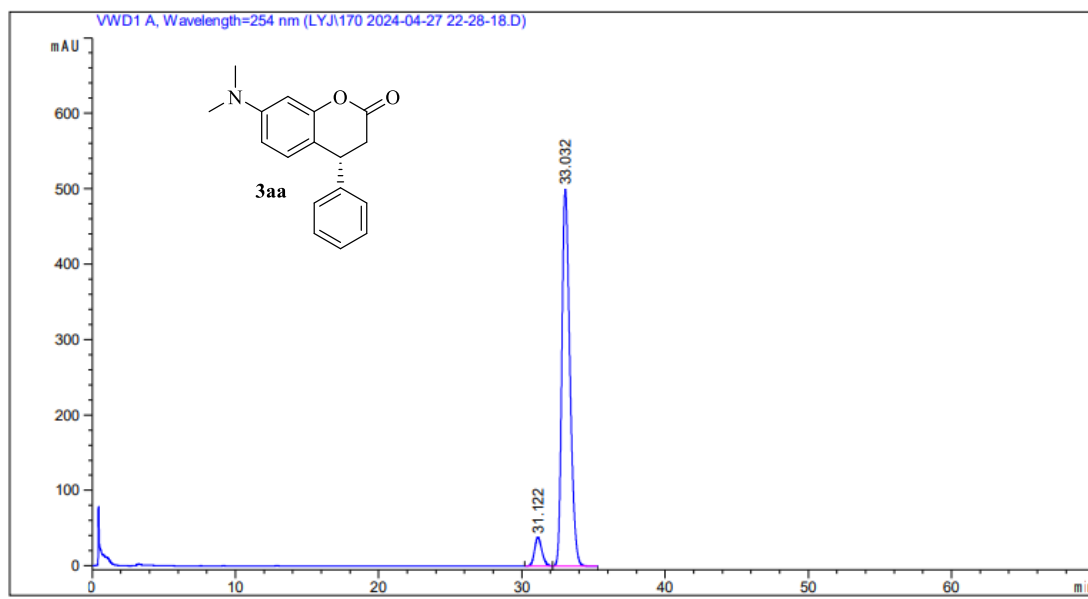

| 峰 # | 保留时间 [min] | 类型 | 峰宽 [min] | 峰面积 [mAU*s] | 峰高 [mAU]  | 峰面积 %   |
|-----|------------|----|----------|-------------|-----------|---------|
| 1   | 31.122     | BB | 0.5465   | 1357.86938  | 38.22024  | 6.5112  |
| 2   | 33.032     | BB | 0.6004   | 1.94966e4   | 499.52481 | 93.4888 |

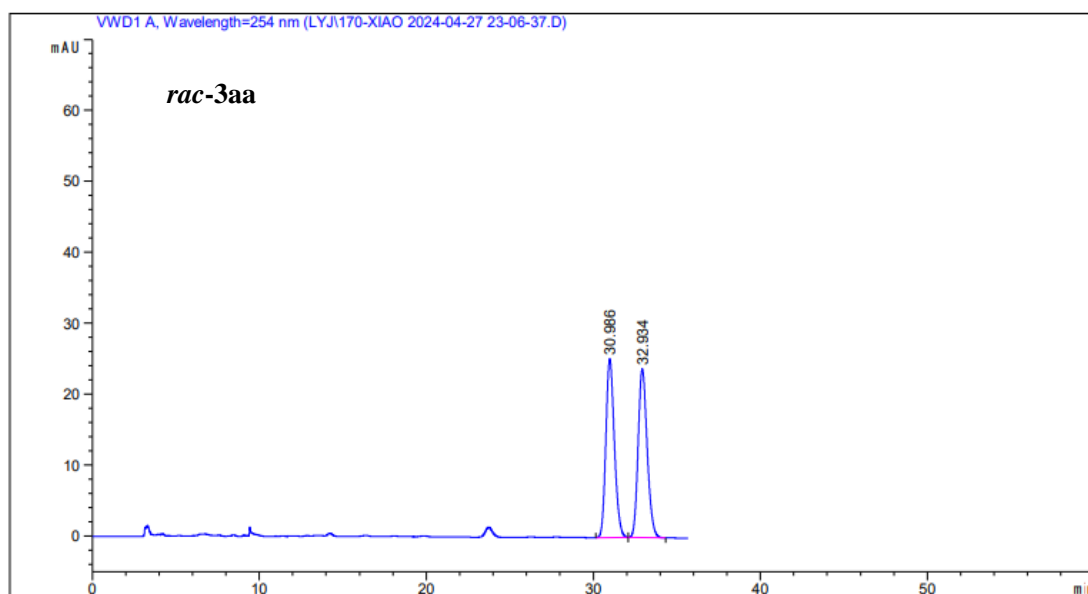

| 峰 # | 保留时间 [min] | 类型 | 峰宽 [min] | 峰面积 [mAU*s] | 峰高 [mAU] | 峰面积 %   |
|-----|------------|----|----------|-------------|----------|---------|
| 1   | 30.986     | BB | 0.5454   | 892.83173   | 25.19432 | 49.9582 |
| 2   | 32.934     | BB | 0.5776   | 894.32654   | 23.78979 | 50.0418 |

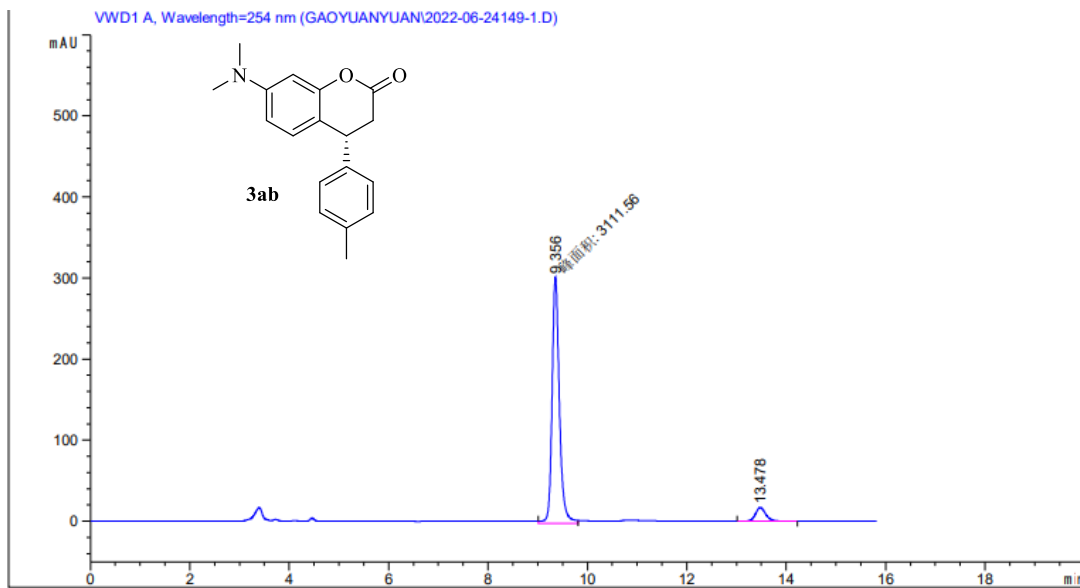

| 峰 # | 保留时间 [min] | 类型 | 峰宽 [min] | 峰面积 [mAU*s] | 峰高 [mAU]  | 峰面积 %   |
|-----|------------|----|----------|-------------|-----------|---------|
| 1   | 9.356      | MM | 0.1707   | 3111.56323  | 303.85941 | 92.7665 |
| 2   | 13.478     | BB | 0.2182   | 242.62592   | 16.92815  | 7.2335  |

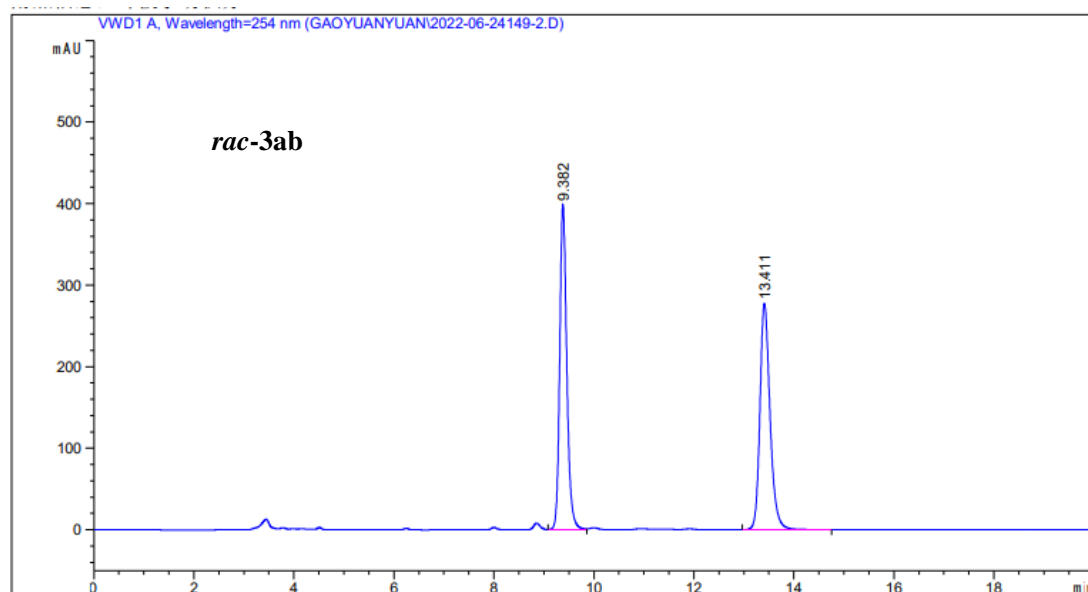

| 峰 # | 保留时间 [min] | 类型 | 峰宽 [min] | 峰面积 [mAU*s] | 峰高 [mAU]  | 峰面积 %   |
|-----|------------|----|----------|-------------|-----------|---------|
| 1   | 9.382      | VV | 0.1497   | 3921.19727  | 398.75150 | 50.1569 |
| 2   | 13.411     | BB | 0.2127   | 3896.65723  | 277.64203 | 49.8431 |

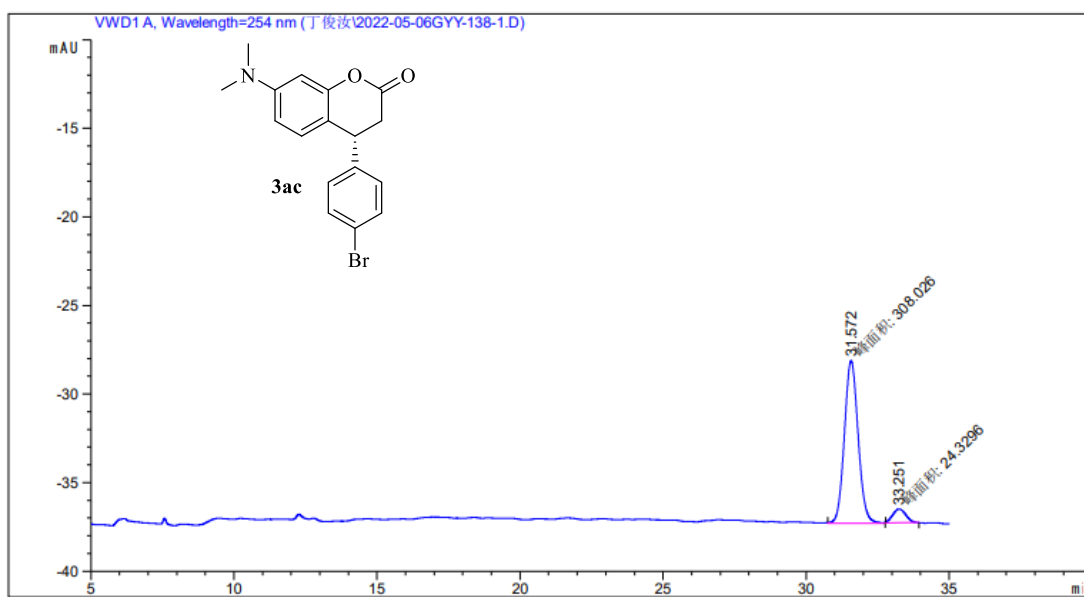

| 峰 # | 保留时间 [min] | 类型 | 峰宽 [min] | 峰面积 [mAU*s] | 峰高 [mAU]   | 峰面积 %   |
|-----|------------|----|----------|-------------|------------|---------|
| 1   | 31.572     | MM | 0.5585   | 308.02609   | 9.19260    | 92.6796 |
| 2   | 33.251     | MM | 0.5256   | 24.32961    | 7.71558e-1 | 7.3204  |

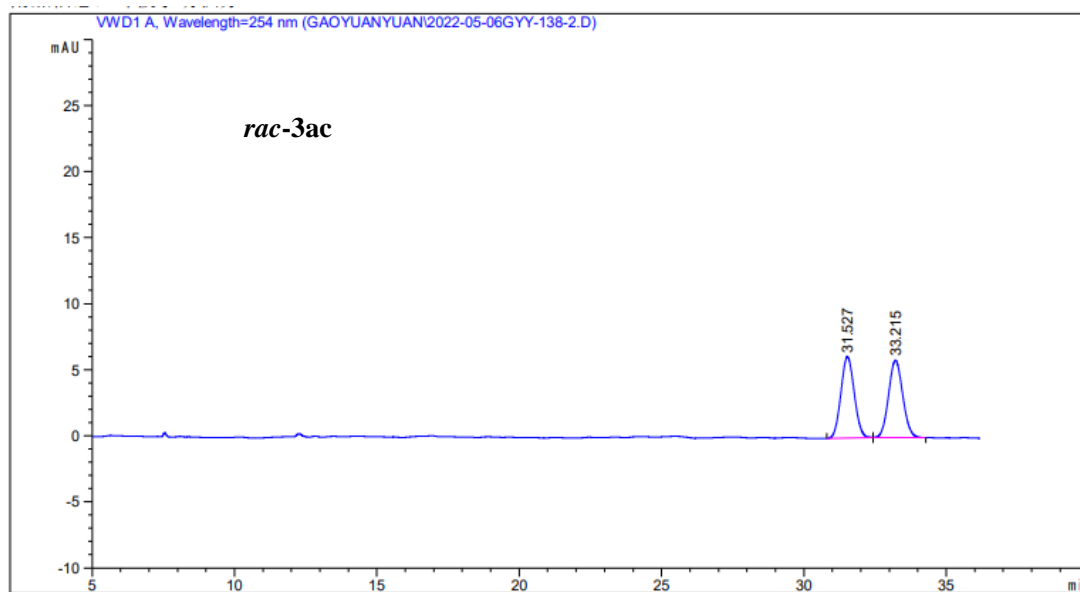

| 峰 # | 保留时间 [min] | 类型 | 峰宽 [min] | 峰面积 [mAU*s] | 峰高 [mAU] | 峰面积 %   |
|-----|------------|----|----------|-------------|----------|---------|
| 1   | 31.527     | BB | 0.5060   | 200.21280   | 6.14648  | 49.8168 |
| 2   | 33.215     | BB | 0.5330   | 201.68523   | 5.83816  | 50.1832 |



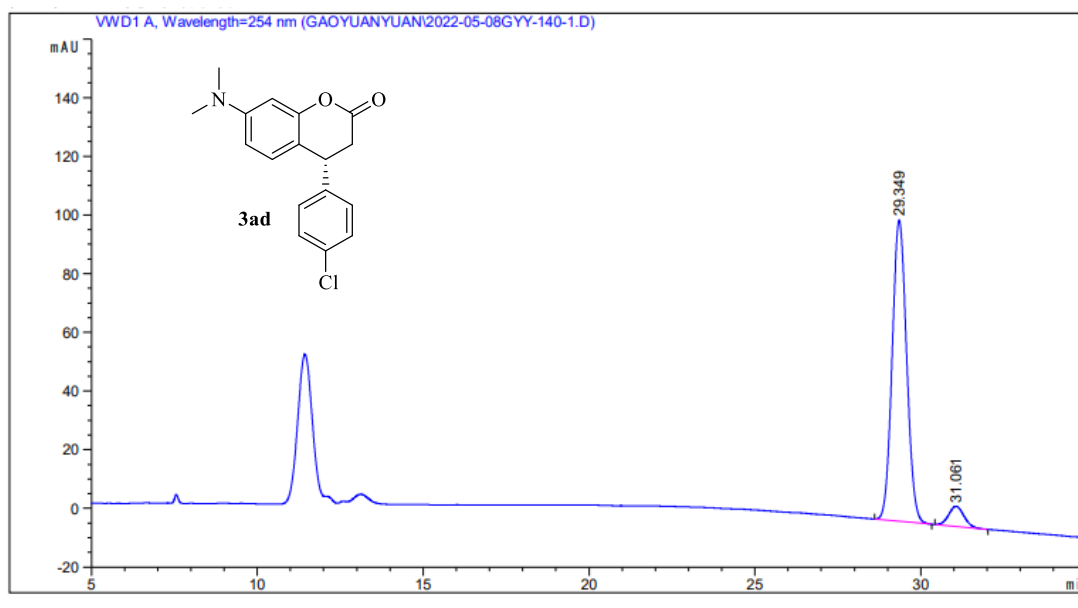

| 峰 # | 保留时间 [min] | 类型  | 峰宽 [min] | 峰面积 [mAU*s] | 峰高 [mAU]  | 峰面积 %   |
|-----|------------|-----|----------|-------------|-----------|---------|
| 1   | 29.349     | BB  | 0.4719   | 3104.30347  | 102.62521 | 93.4285 |
| 2   | 31.061     | BBA | 0.4957   | 218.34731   | 6.83510   | 6.5715  |

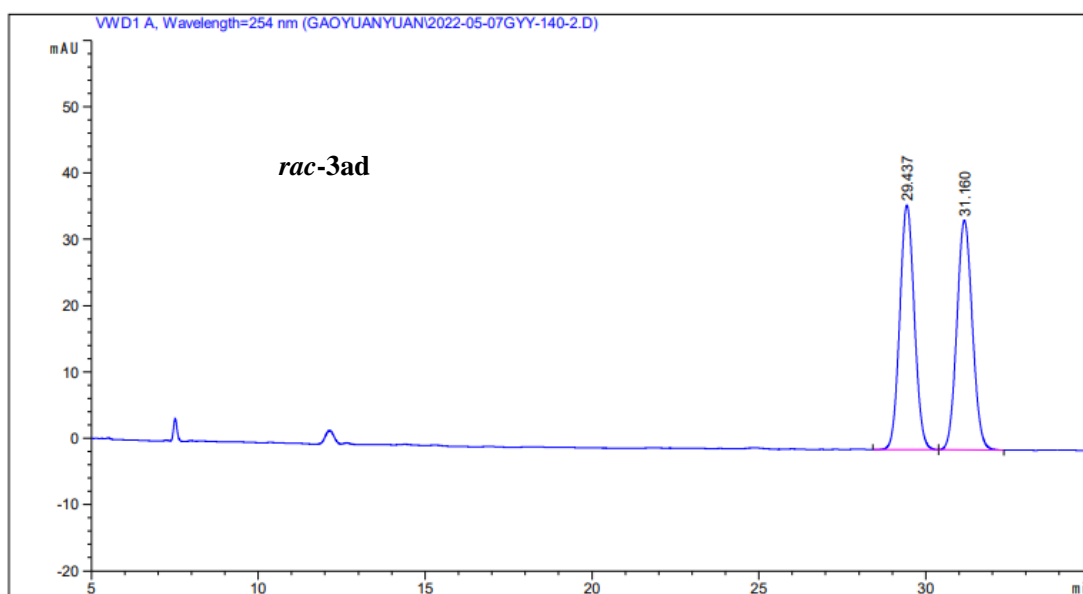

| 峰 # | 保留时间 [min] | 类型 | 峰宽 [min] | 峰面积 [mAU*s] | 峰高 [mAU] | 峰面积 %   |
|-----|------------|----|----------|-------------|----------|---------|
| 1   | 29.437     | BB | 0.4742   | 1122.75598  | 36.87444 | 50.0743 |
| 2   | 31.160     | BB | 0.5044   | 1119.42468  | 34.60501 | 49.9257 |

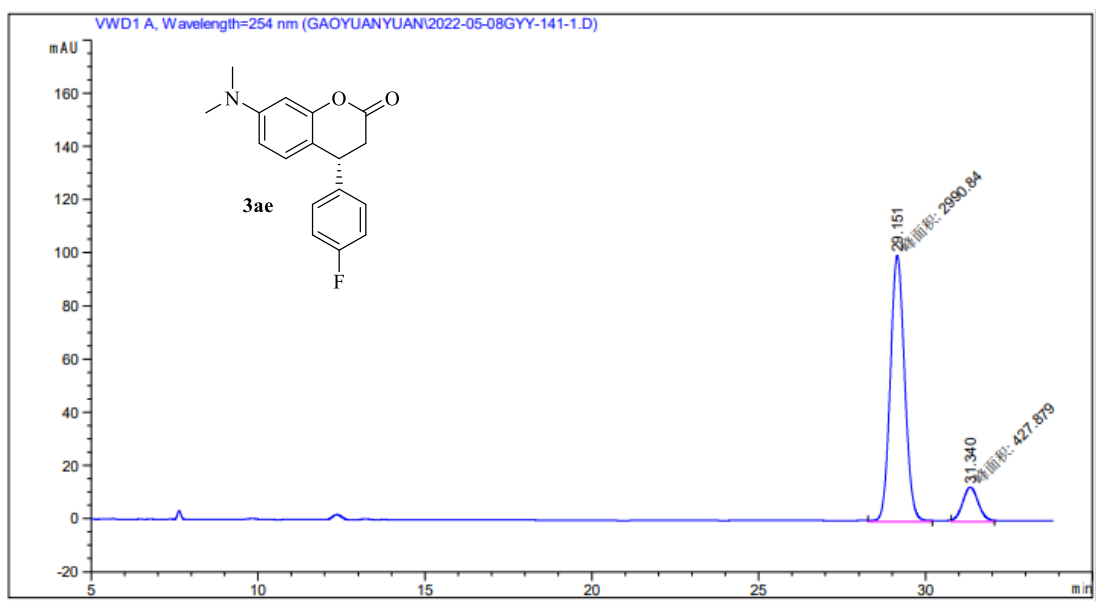

| 峰 # | 保留时间 [min] | 类型 | 峰宽 [min] | 峰面积 [mAU*s] | 峰高 [mAU] | 峰面积 %   |
|-----|------------|----|----------|-------------|----------|---------|
| 1   | 29.151     | MM | 0.4987   | 2990.83813  | 99.96323 | 87.4842 |
| 2   | 31.340     | MM | 0.5511   | 427.87927   | 12.94122 | 12.5158 |

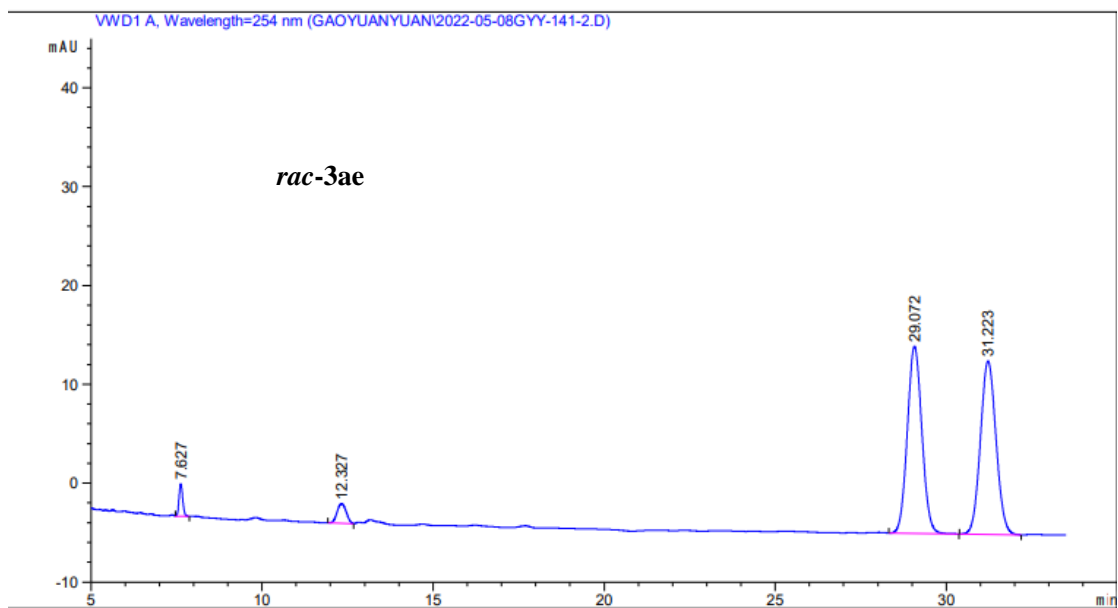

| 峰 # | 保留时间 [min] | 类型 | 峰宽 [min] | 峰面积 [mAU*s] | 峰高 [mAU] | 峰面积 %   |
|-----|------------|----|----------|-------------|----------|---------|
| 3   | 29.072     | BB | 0.4604   | 558.53485   | 18.92244 | 47.5208 |
| 4   | 31.223     | BB | 0.4940   | 556.06226   | 17.53439 | 47.3104 |

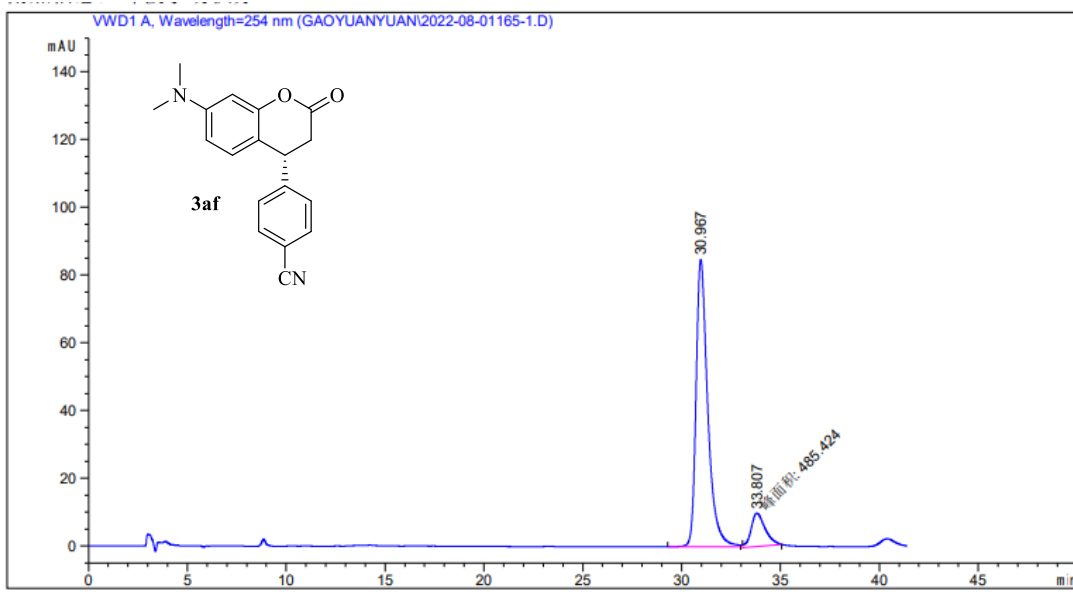

| 峰 # | 保留时间 [min] | 类型 | 峰宽 [min] | 峰面积 [mAU*s] | 峰高 [mAU] | 峰面积 %   |
|-----|------------|----|----------|-------------|----------|---------|
| 1   | 30.967     | BV | 0.6188   | 3479.00122  | 84.76335 | 87.7555 |
| 2   | 33.807     | MM | 0.8220   | 485.42407   | 9.84242  | 12.2445 |

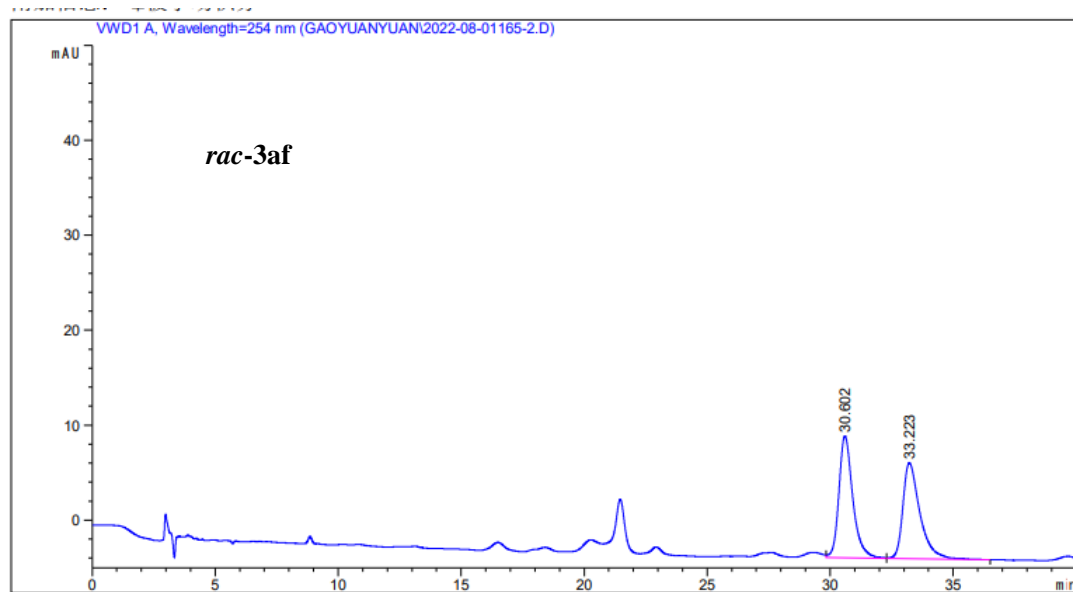

| 峰 # | 保留时间 [min] | 类型 | 峰宽 [min] | 峰面积 [mAU*s] | 峰高 [mAU] | 峰面积 %   |
|-----|------------|----|----------|-------------|----------|---------|
| 1   | 30.602     | VV | 0.5940   | 503.90137   | 12.83702 | 50.7590 |
| 2   | 33.223     | VB | 0.7165   | 488.83115   | 10.10299 | 49.2410 |

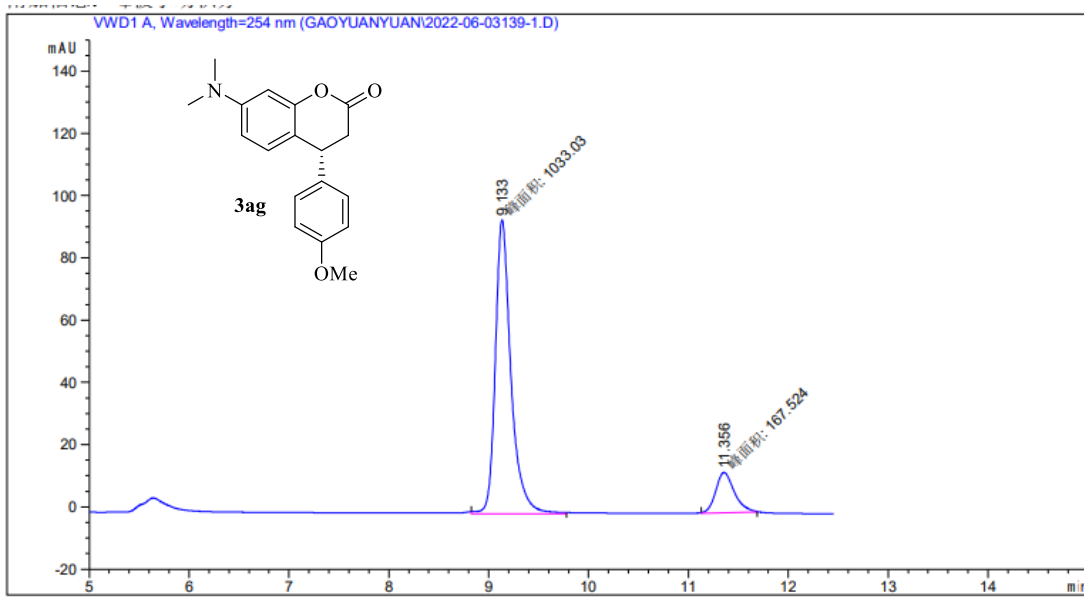

| 峰 # | 保留时间 [min] | 类型 | 峰宽 [min] | 峰面积 [mAU*s] | 峰高 [mAU] | 峰面积 %   |
|-----|------------|----|----------|-------------|----------|---------|
| 1   | 9.133      | MM | 0.1822   | 1033.02979  | 94.48739 | 86.0461 |
| 2   | 11.356     | MM | 0.2160   | 167.52368   | 12.92853 | 13.9539 |

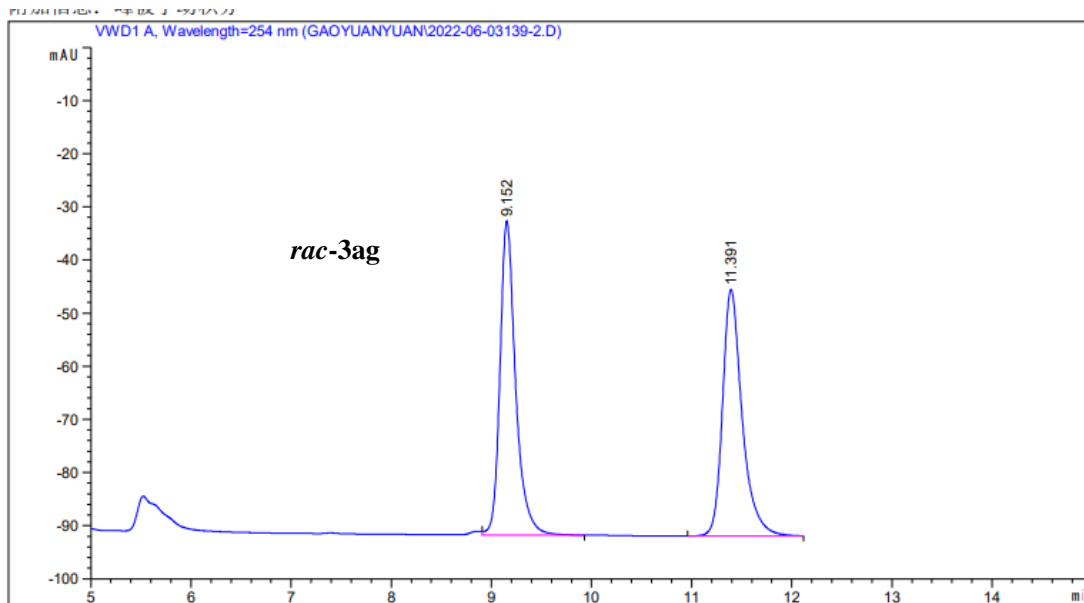

| 峰 # | 保留时间 [min] | 类型  | 峰宽 [min] | 峰面积 [mAU*s] | 峰高 [mAU] | 峰面积 %   |
|-----|------------|-----|----------|-------------|----------|---------|
| 1   | 9.152      | VB  | 0.1625   | 640.45966   | 59.07540 | 50.3217 |
| 2   | 11.391     | BBA | 0.2039   | 632.27014   | 46.41124 | 49.6783 |

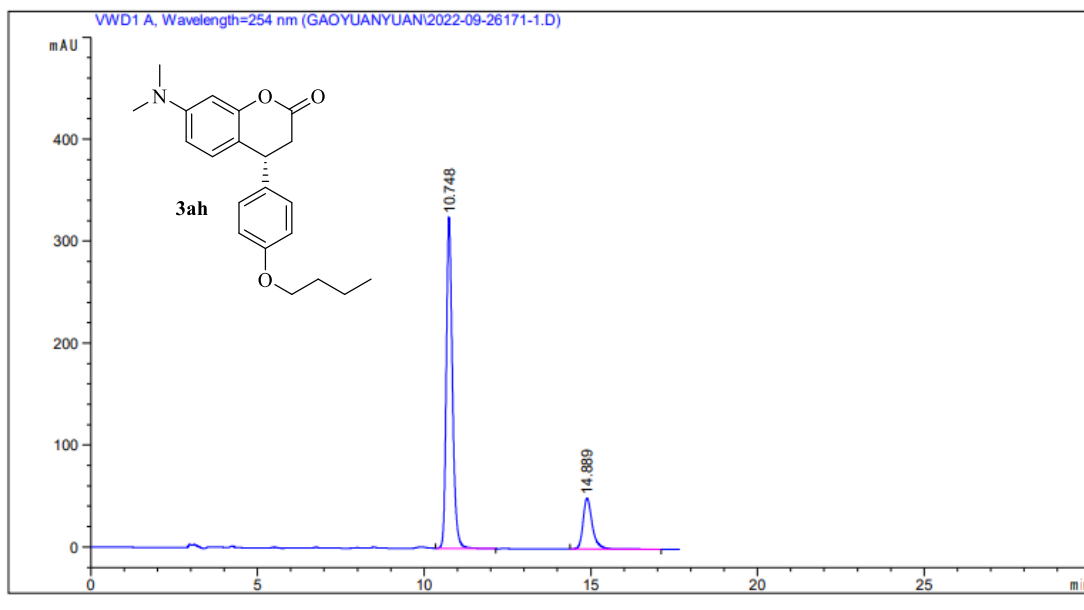

| 峰 # | 保留时间 [min] | 类型 | 峰宽 [min] | 峰面积 [mAU*s] | 峰高 [mAU]  | 峰面积 %   |
|-----|------------|----|----------|-------------|-----------|---------|
| 1   | 10.748     | VB | 0.1978   | 4164.28320  | 324.37350 | 81.2929 |
| 2   | 14.889     | VB | 0.2877   | 958.28662   | 49.97046  | 18.7071 |

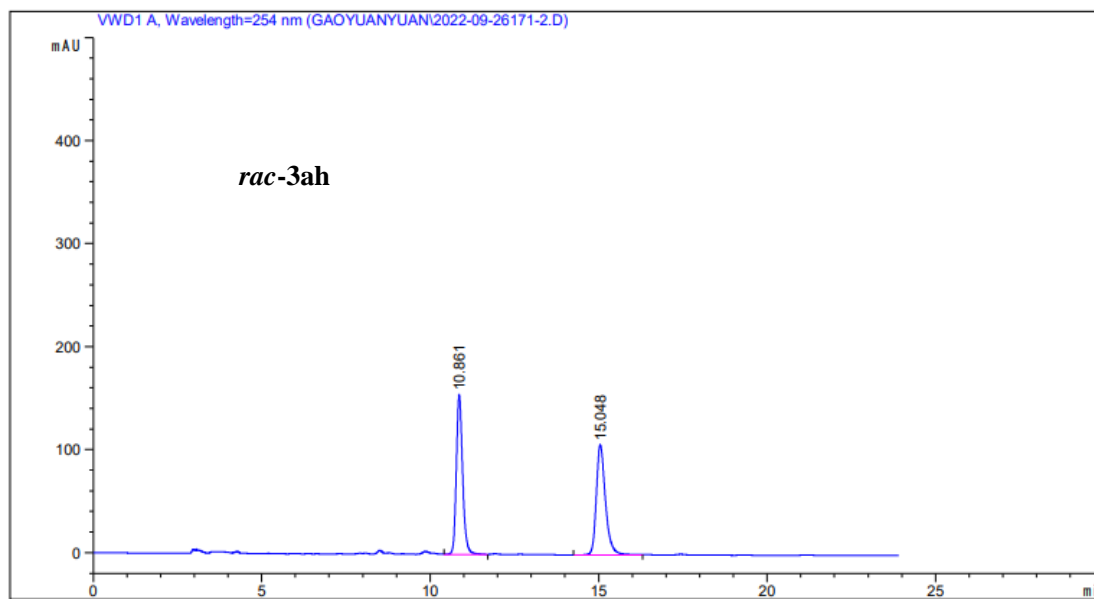

| 峰 # | 保留时间 [min] | 类型 | 峰宽 [min] | 峰面积 [mAU*s] | 峰高 [mAU]  | 峰面积 %   |
|-----|------------|----|----------|-------------|-----------|---------|
| 1   | 10.861     | VV | 0.1954   | 2014.46899  | 155.25610 | 49.9855 |
| 2   | 15.048     | BV | 0.2885   | 2015.63611  | 106.65786 | 50.0145 |

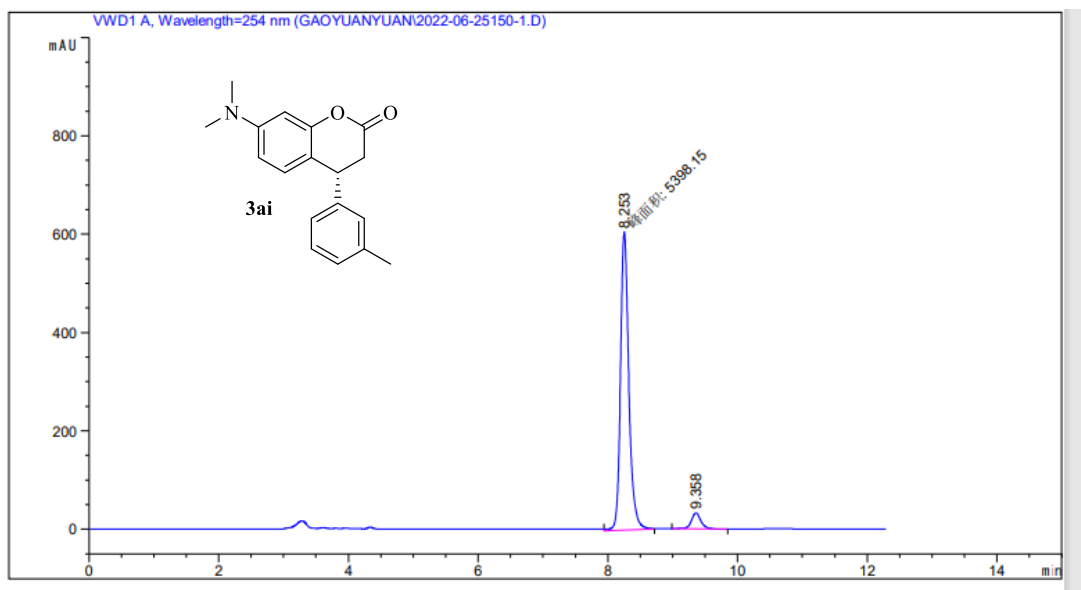

| 峰 # | 保留时间 [min] | 类型 | 峰宽 [min] | 峰面积 [mAU*s] | 峰高 [mAU]  | 峰面积 %   |
|-----|------------|----|----------|-------------|-----------|---------|
| 1   | 8.253      | MM | 0.1484   | 5398.14990  | 606.11841 | 94.1485 |
| 2   | 9.358      | BB | 0.1540   | 335.50391   | 32.62458  | 5.8515  |

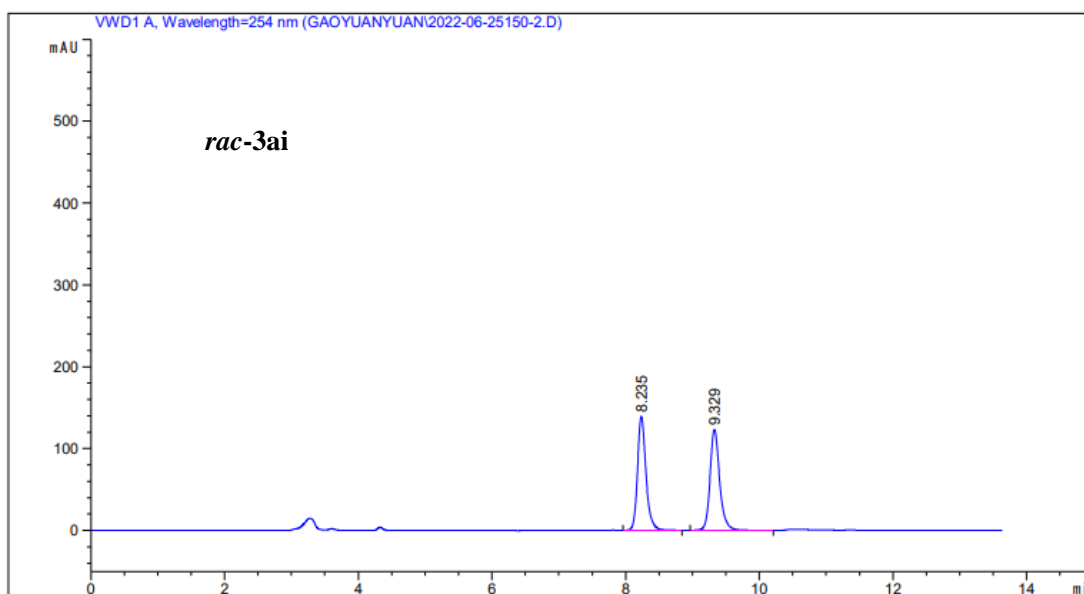

| 峰 # | 保留时间 [min] | 类型 | 峰宽 [min] | 峰面积 [mAU*s] | 峰高 [mAU]  | 峰面积 %   |
|-----|------------|----|----------|-------------|-----------|---------|
| 1   | 8.235      | BB | 0.1328   | 1225.46594  | 139.09288 | 49.8705 |
| 2   | 9.329      | BB | 0.1507   | 1231.83203  | 123.15009 | 50.1295 |

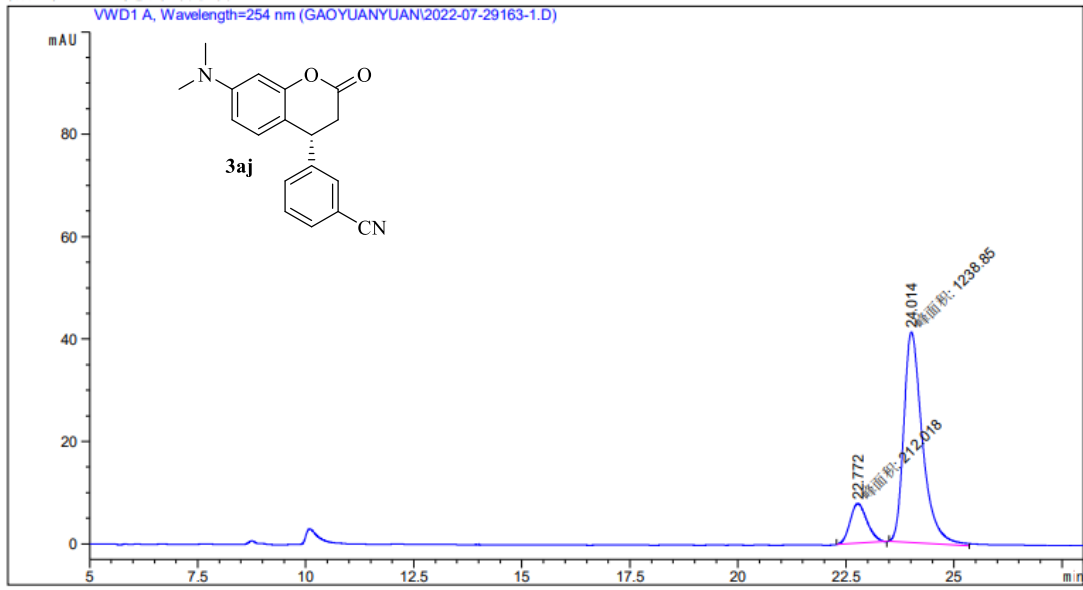

| 峰 # | 保留时间 [min] | 类型 | 峰宽 [min] | 峰面积 [mAU*s] | 峰高 [mAU] | 峰面积 %   |
|-----|------------|----|----------|-------------|----------|---------|
| 1   | 22.772     | MM | 0.4554   | 212.01811   | 7.75949  | 14.6132 |
| 2   | 24.014     | MM | 0.5019   | 1238.84705  | 41.13690 | 85.3868 |

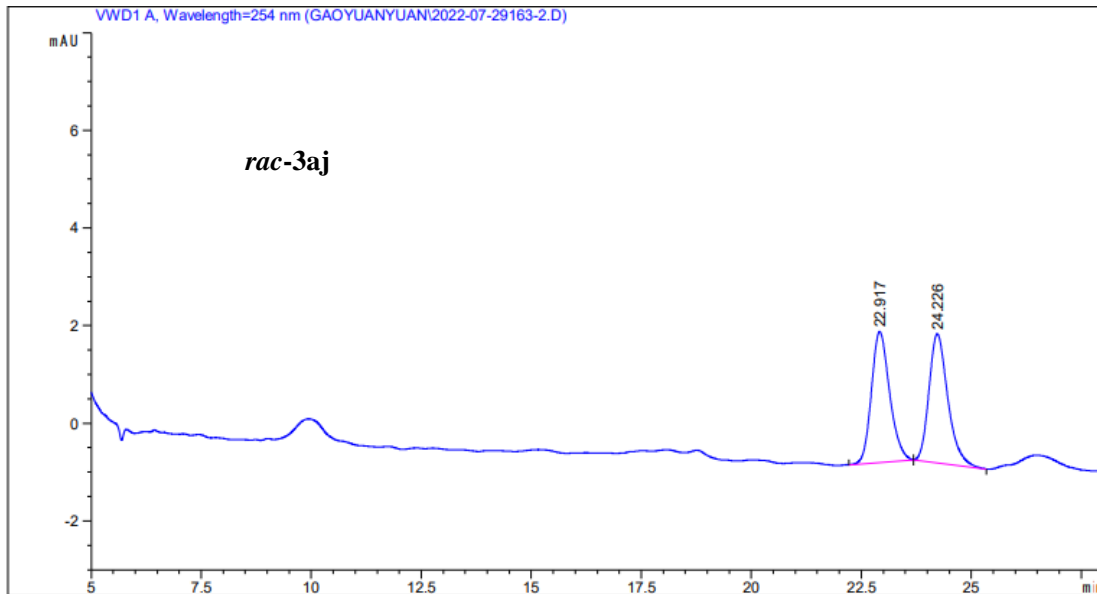

| 峰 # | 保留时间 [min] | 类型 | 峰宽 [min] | 峰面积 [mAU*s] | 峰高 [mAU] | 峰面积 %   |
|-----|------------|----|----------|-------------|----------|---------|
| 1   | 22.917     | BB | 0.4394   | 77.05459    | 2.68051  | 49.4075 |
| 2   | 24.226     | BB | 0.4424   | 78.90276    | 2.64188  | 50.5925 |

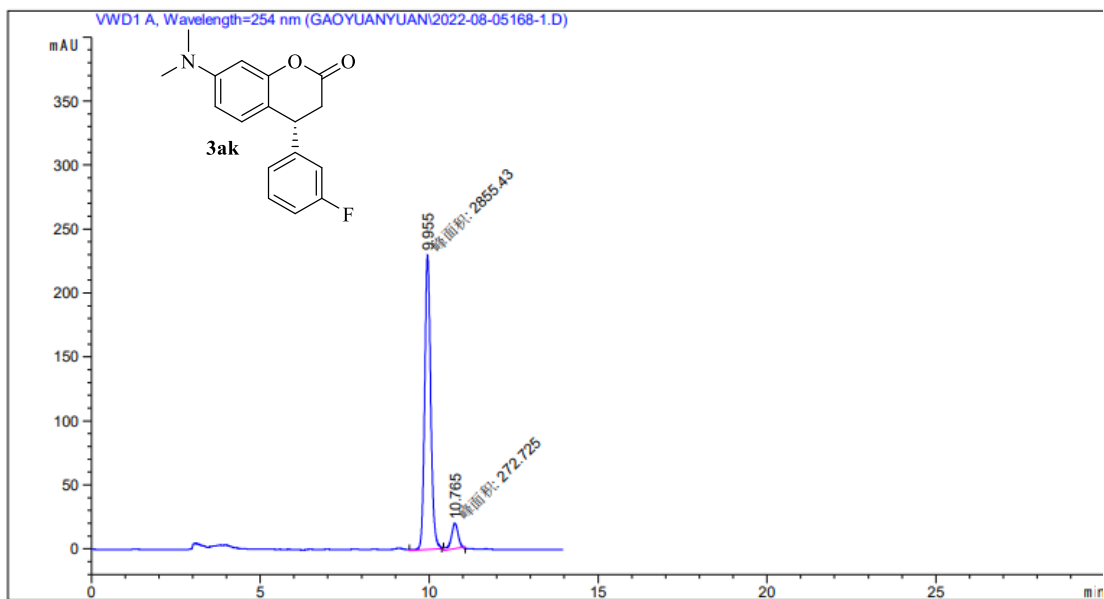

| 峰 # | 保留时间 [min] | 类型 | 峰宽 [min] | 峰面积 [mAU*s] | 峰高 [mAU]  | 峰面积 %   |
|-----|------------|----|----------|-------------|-----------|---------|
| 1   | 9.955      | MM | 0.2067   | 2855.42676  | 230.18752 | 91.2816 |
| 2   | 10.765     | MM | 0.2301   | 272.72491   | 19.75656  | 8.7184  |

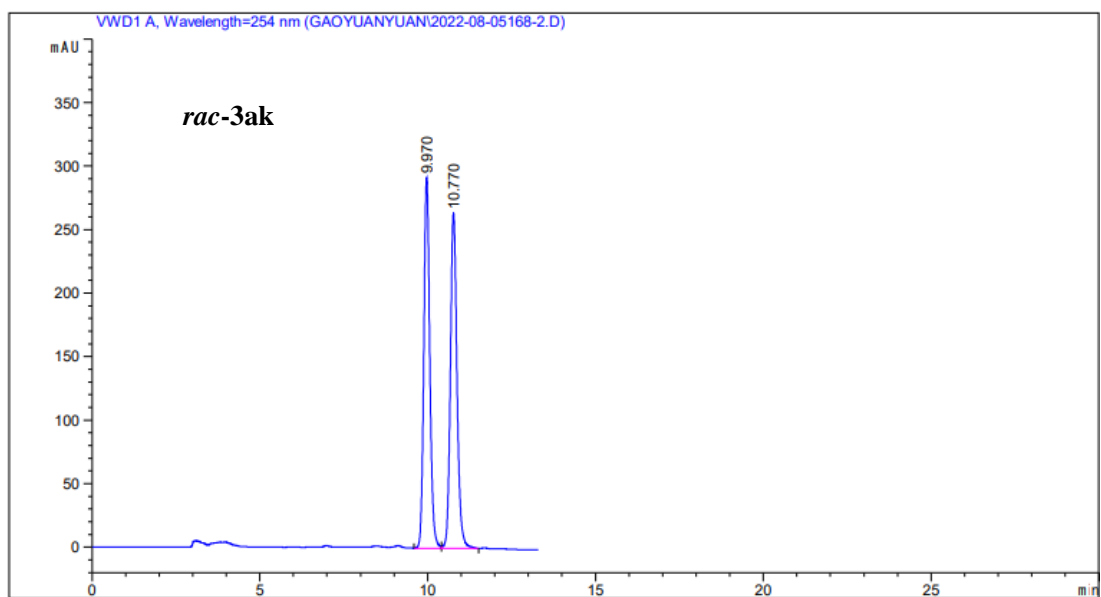

| 峰 # | 保留时间 [min] | 类型 | 峰宽 [min] | 峰面积 [mAU*s] | 峰高 [mAU]  | 峰面积 %   |
|-----|------------|----|----------|-------------|-----------|---------|
| 1   | 9.970      | BV | 0.1886   | 3612.25854  | 291.49619 | 50.0279 |
| 2   | 10.770     | VB | 0.2116   | 3608.22949  | 263.82230 | 49.9721 |



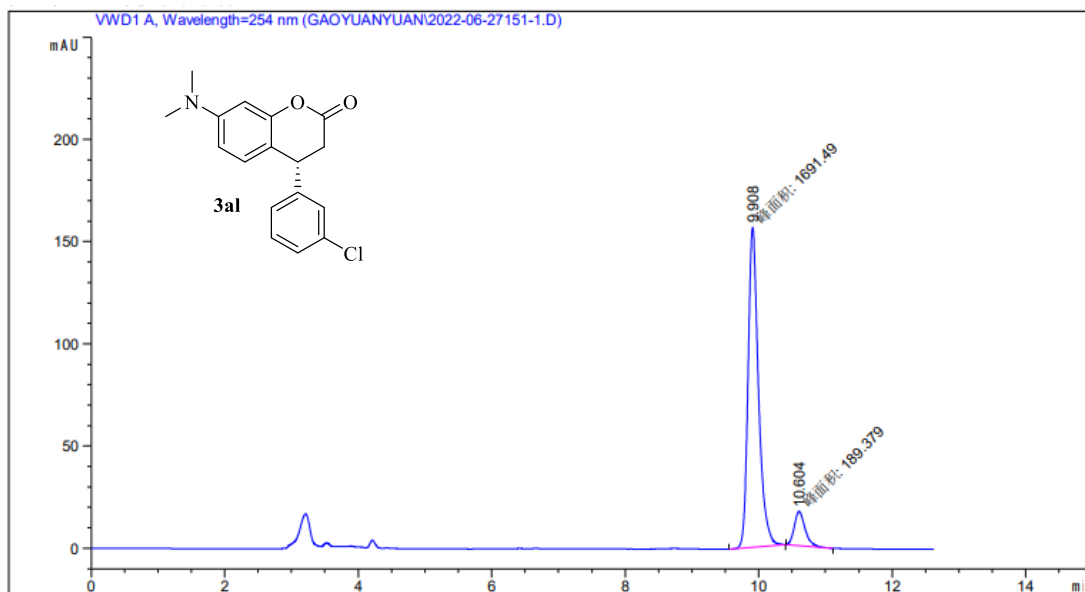

| 峰 # | 保留时间 [min] | 类型 | 峰宽 [min] | 峰面积 [mAU*s] | 峰高 [mAU]  | 峰面积 %   |
|-----|------------|----|----------|-------------|-----------|---------|
| 1   | 9.908      | MM | 0.1801   | 1691.49292  | 156.55855 | 89.9313 |
| 2   | 10.604     | MM | 0.1873   | 189.37907   | 16.84866  | 10.0687 |

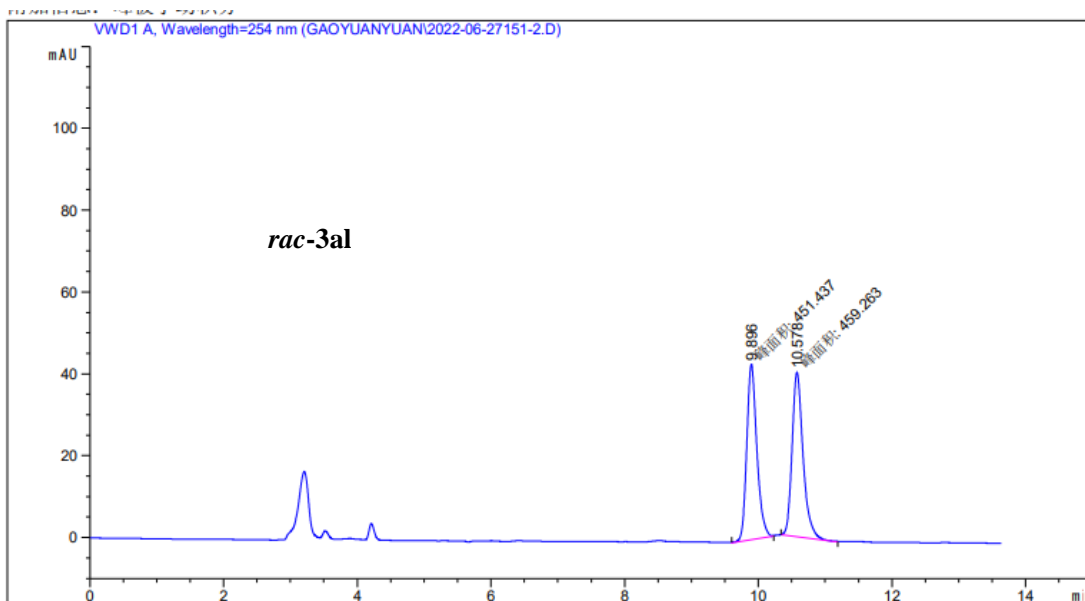

| 峰 # | 保留时间 [min] | 类型 | 峰宽 [min] | 峰面积 [mAU*s] | 峰高 [mAU] | 峰面积 %   |
|-----|------------|----|----------|-------------|----------|---------|
| 1   | 9.896      | MM | 0.1753   | 451.43683   | 42.91893 | 49.5703 |
| 2   | 10.578     | MM | 0.1901   | 459.26288   | 40.26058 | 50.4297 |

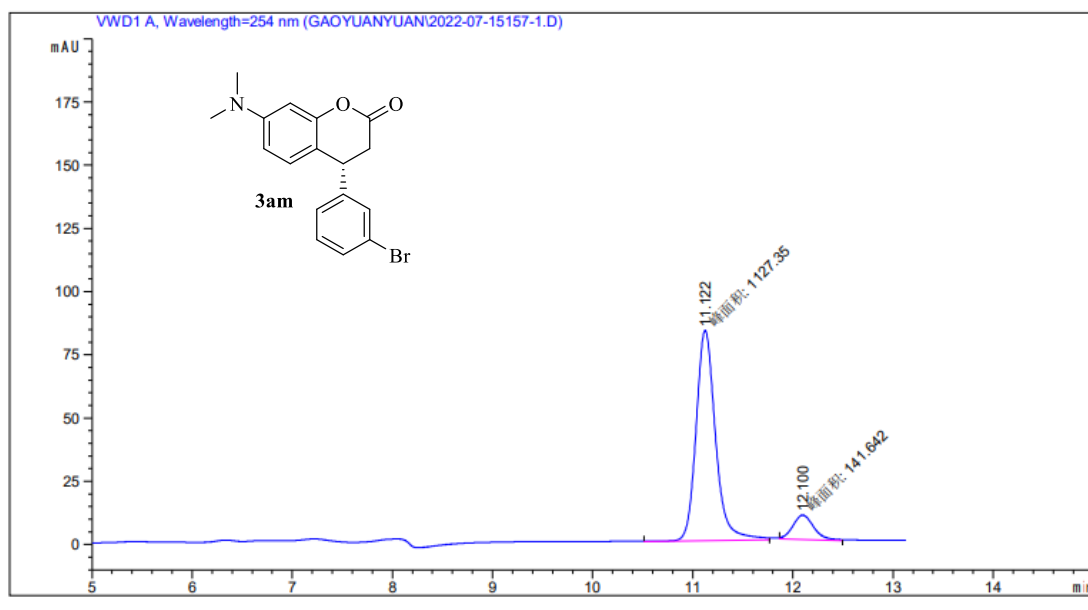

| 峰 # | 保留时间 [min] | 类型 | 峰宽 [min] | 峰面积 [mAU*s] | 峰高 [mAU] | 峰面积 %   |
|-----|------------|----|----------|-------------|----------|---------|
| 1   | 11.122     | MM | 0.2257   | 1127.34790  | 83.23850 | 88.8382 |
| 2   | 12.100     | MM | 0.2447   | 141.64246   | 9.64810  | 11.1618 |

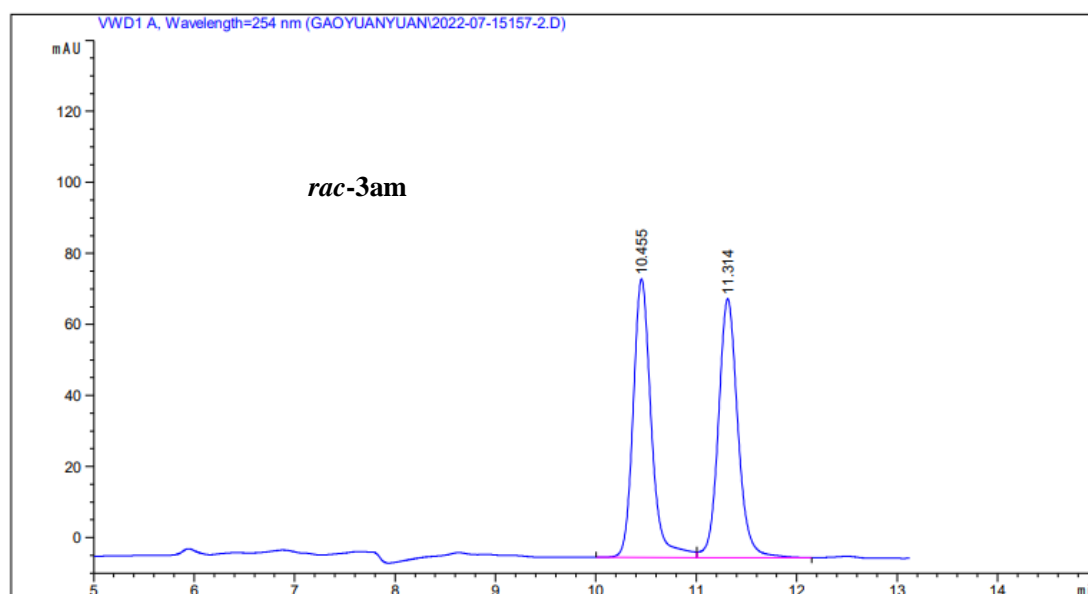

| 峰 # | 保留时间 [min] | 类型 | 峰宽 [min] | 峰面积 [mAU*s] | 峰高 [mAU] | 峰面积 %   |
|-----|------------|----|----------|-------------|----------|---------|
| 1   | 10.455     | BV | 0.1908   | 980.01318   | 78.43313 | 50.0568 |
| 2   | 11.314     | VB | 0.2045   | 977.79028   | 72.87521 | 49.9432 |

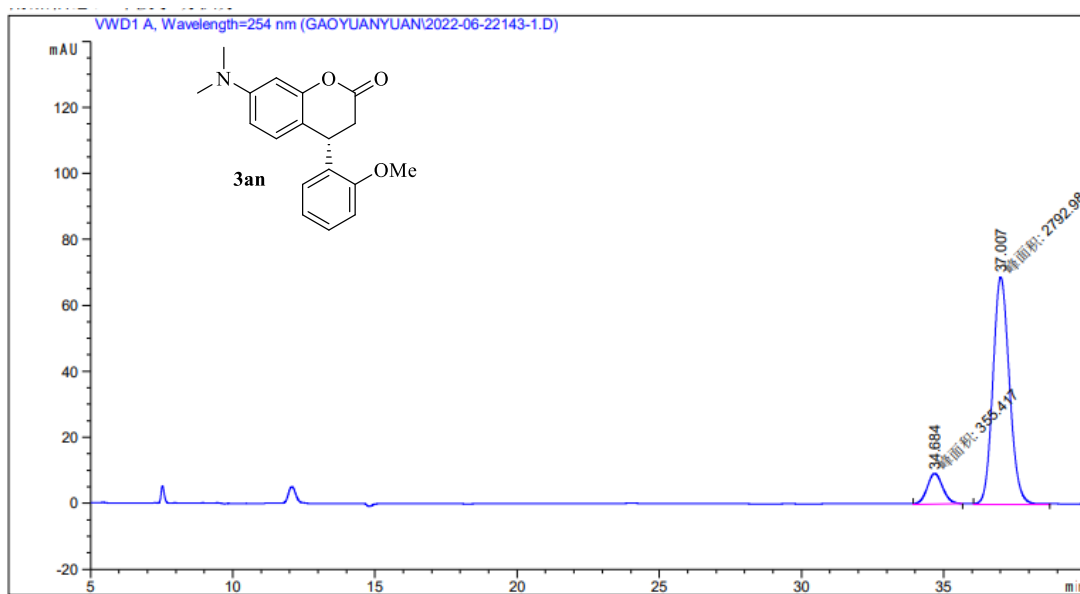

| 峰 # | 保留时间 [min] | 类型 | 峰宽 [min] | 峰面积 [mAU*s] | 峰高 [mAU] | 峰面积 %   |
|-----|------------|----|----------|-------------|----------|---------|
| 1   | 34.684     | MM | 0.6358   | 355.41727   | 9.31702  | 11.2888 |
| 2   | 37.007     | MM | 0.6752   | 2792.97998  | 68.93867 | 88.7112 |

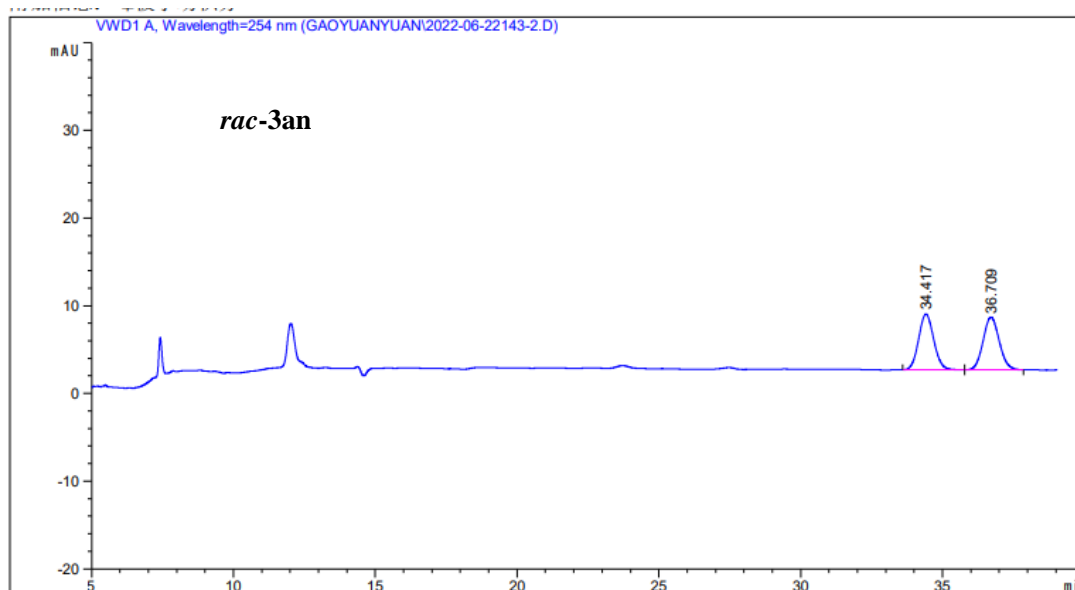

| 峰 # | 保留时间 [min] | 类型 | 峰宽 [min] | 峰面积 [mAU*s] | 峰高 [mAU] | 峰面积 %   |
|-----|------------|----|----------|-------------|----------|---------|
| 1   | 34.417     | BB | 0.5604   | 234.51306   | 6.34248  | 49.6130 |
| 2   | 36.709     | BB | 0.6101   | 238.17120   | 6.02611  | 50.3870 |

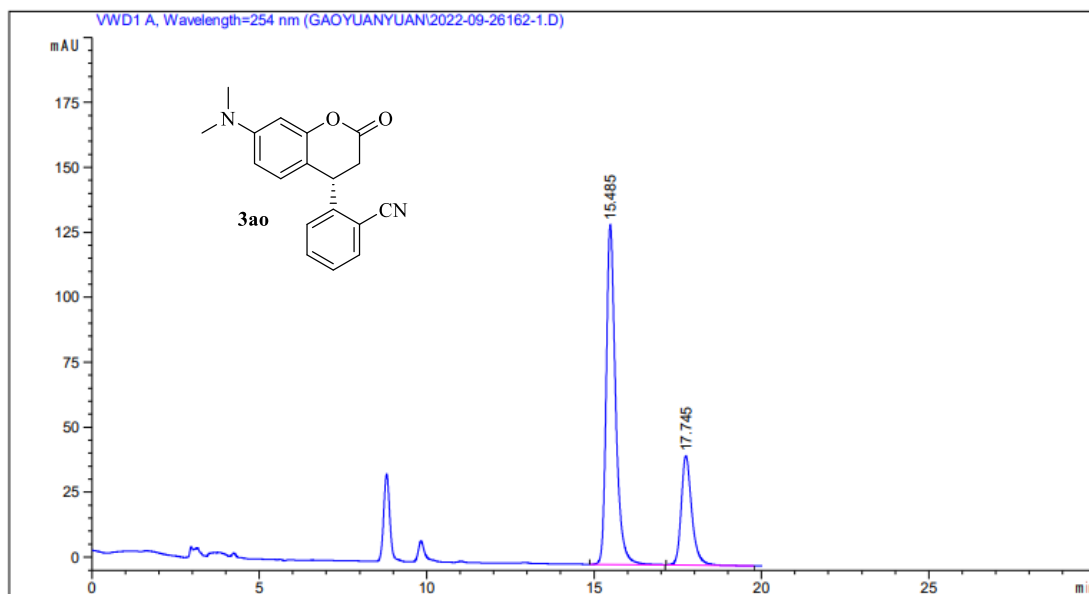

| 峰 # | 保留时间 [min] | 类型 | 峰宽 [min] | 峰面积 [mAU*s] | 峰高 [mAU]  | 峰面积 %   |
|-----|------------|----|----------|-------------|-----------|---------|
| 1   | 15.485     | BB | 0.2930   | 2532.69019  | 130.75598 | 73.2841 |
| 2   | 17.745     | BB | 0.3310   | 923.29987   | 42.07044  | 26.7159 |

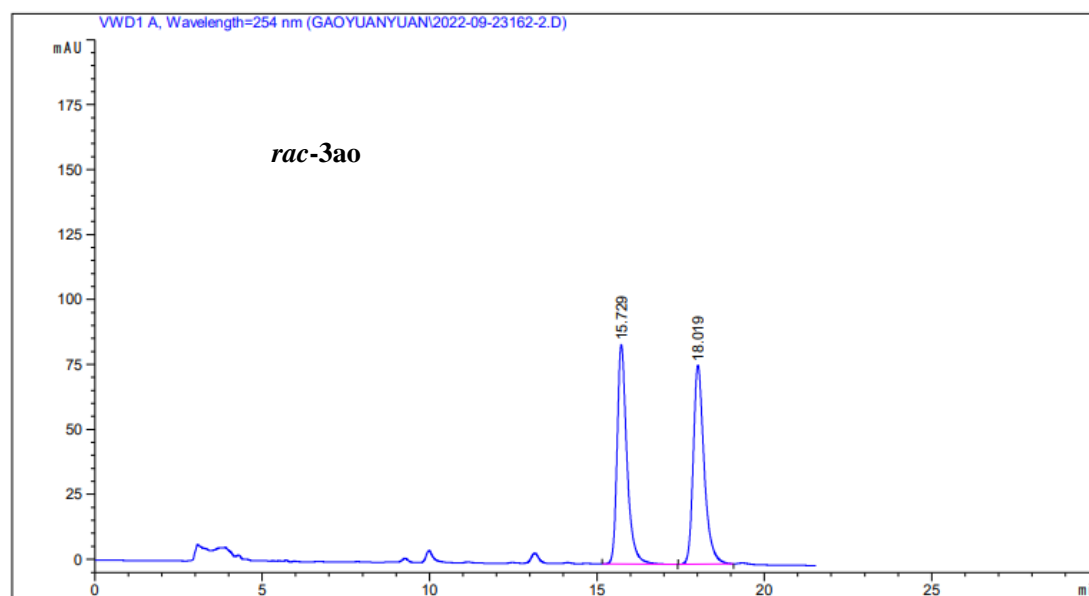

| 峰 # | 保留时间 [min] | 类型 | 峰宽 [min] | 峰面积 [mAU*s] | 峰高 [mAU] | 峰面积 %   |
|-----|------------|----|----------|-------------|----------|---------|
| 1   | 15.729     | BB | 0.3051   | 1718.01880  | 84.52218 | 49.7850 |
| 2   | 18.019     | BB | 0.3411   | 1732.85925  | 76.55825 | 50.2150 |

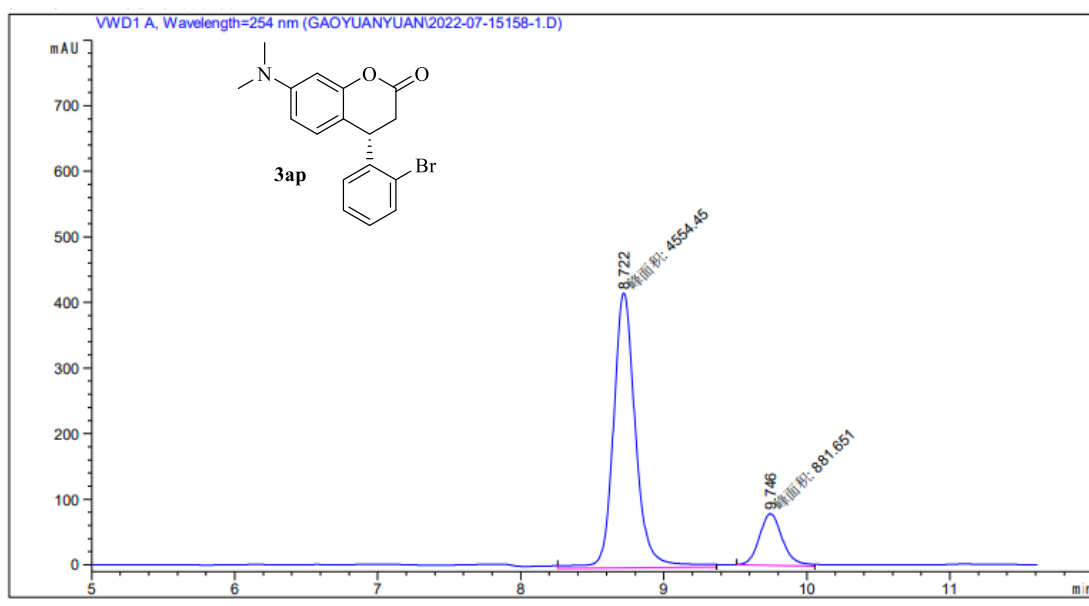

| 峰 # | 保留时间 [min] | 类型 | 峰宽 [min] | 峰面积 [mAU*s] | 峰高 [mAU]  | 峰面积 %   |
|-----|------------|----|----------|-------------|-----------|---------|
| 1   | 8.722      | MM | 0.1812   | 4554.45068  | 418.95493 | 83.7816 |
| 2   | 9.746      | MM | 0.1872   | 881.65118   | 78.49992  | 16.2184 |

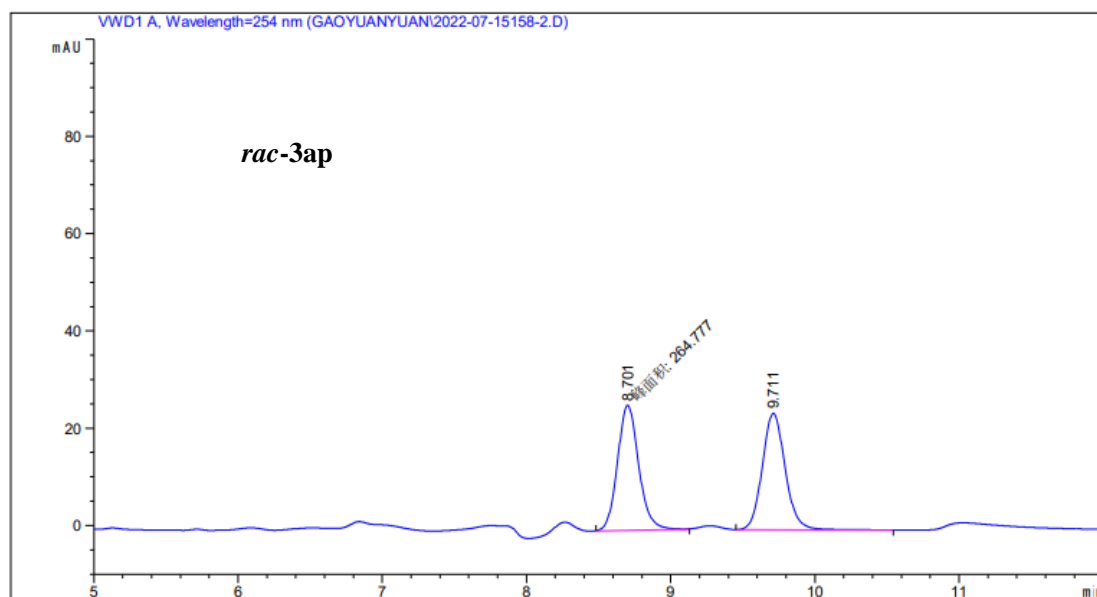

| 峰 # | 保留时间 [min] | 类型 | 峰宽 [min] | 峰面积 [mAU*s] | 峰高 [mAU] | 峰面积 %   |
|-----|------------|----|----------|-------------|----------|---------|
| 1   | 8.701      | MM | 0.1711   | 264.77740   | 25.78514 | 50.0641 |
| 2   | 9.711      | BB | 0.1697   | 264.09961   | 23.94738 | 49.9359 |

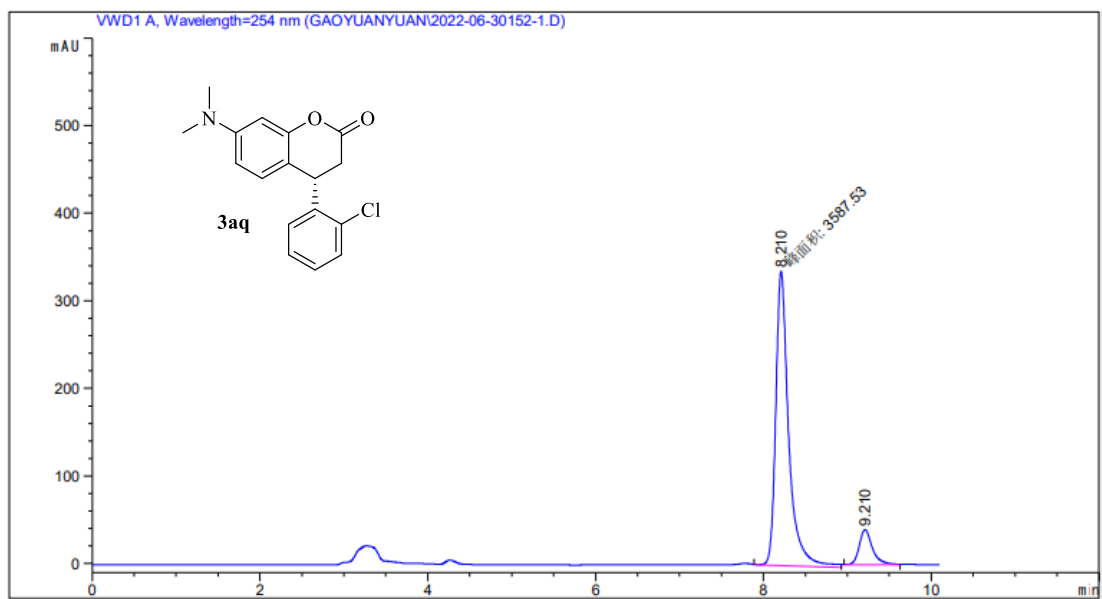

| 峰 # | 保留时间 [min] | 类型 | 峰宽 [min] | 峰面积 [mAU*s] | 峰高 [mAU]  | 峰面积 %   |
|-----|------------|----|----------|-------------|-----------|---------|
| 1   | 8.210      | MM | 0.1781   | 3587.52759  | 335.79007 | 88.9391 |
| 2   | 9.210      | VV | 0.1655   | 446.16412   | 40.20618  | 11.0609 |

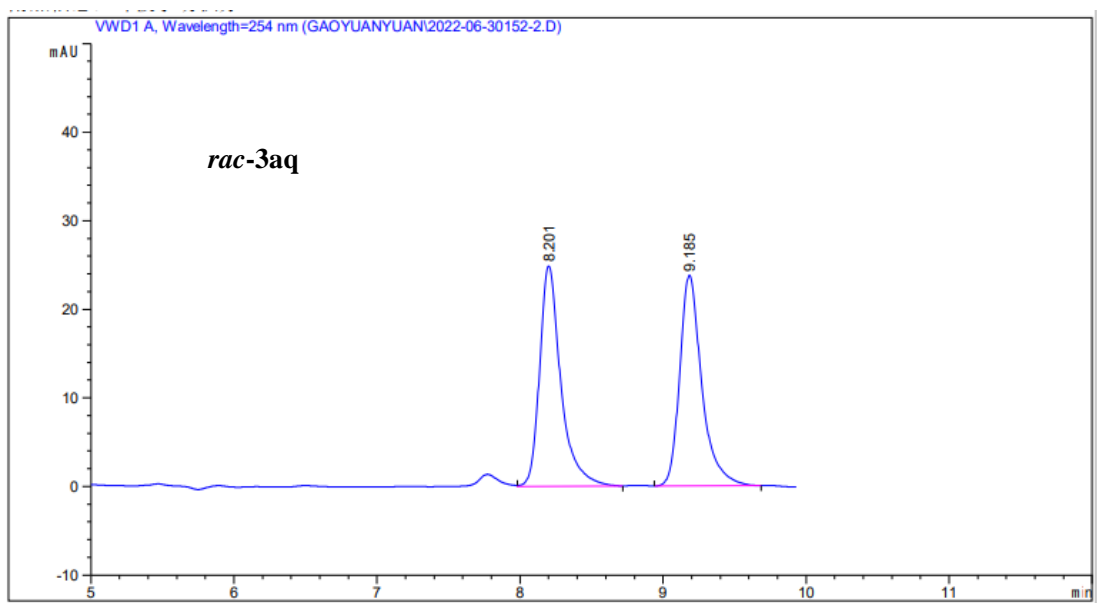

| 峰 # | 保留时间 [min] | 类型 | 峰宽 [min] | 峰面积 [mAU*s] | 峰高 [mAU] | 峰面积 %   |
|-----|------------|----|----------|-------------|----------|---------|
| 1   | 8.201      | VB | 0.1543   | 256.14182   | 24.84493 | 50.1059 |
| 2   | 9.185      | BB | 0.1612   | 255.05911   | 23.77225 | 49.8941 |

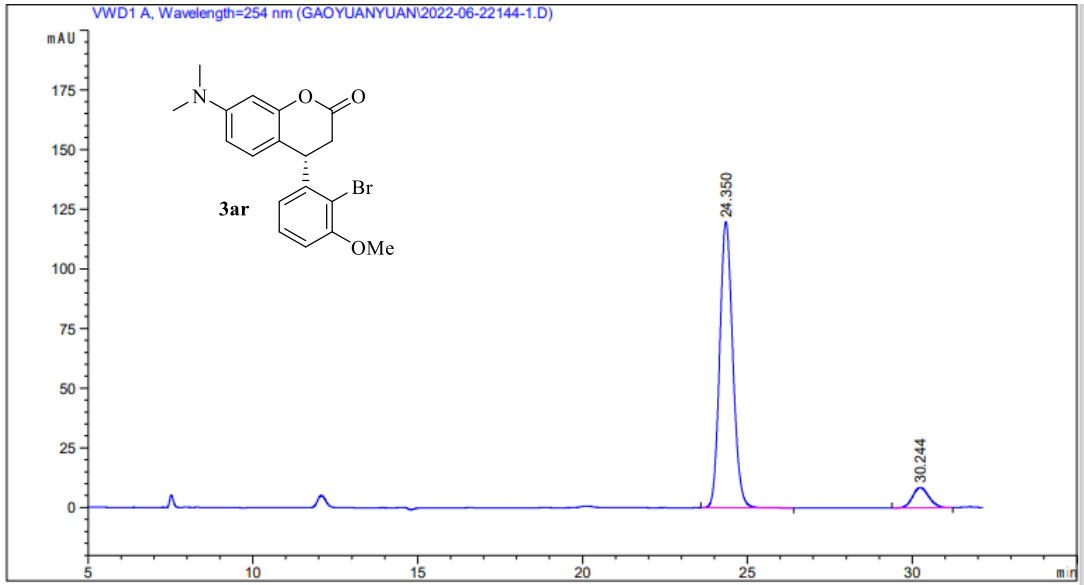

| 峰 # | 保留时间 [min] | 类型 | 峰宽 [min] | 峰面积 [mAU*s] | 峰高 [mAU]  | 峰面积 %   |
|-----|------------|----|----------|-------------|-----------|---------|
| 1   | 24.350     | BB | 0.4249   | 3294.20190  | 119.77538 | 91.8115 |
| 2   | 30.244     | BB | 0.5293   | 293.80368   | 8.54070   | 8.1885  |

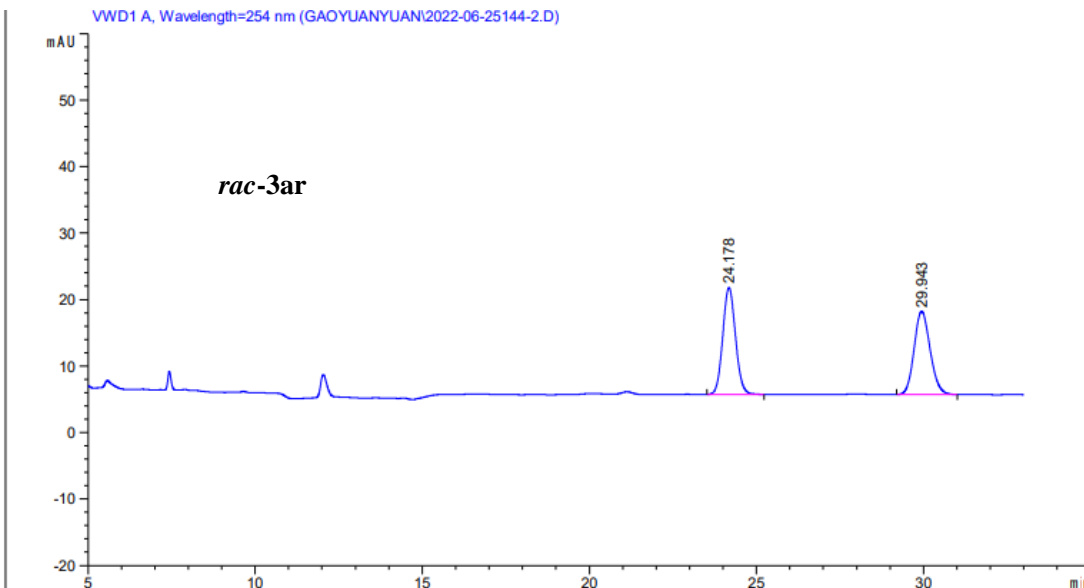

| 峰 # | 保留时间 [min] | 类型 | 峰宽 [min] | 峰面积 [mAU*s] | 峰高 [mAU] | 峰面积 %   |
|-----|------------|----|----------|-------------|----------|---------|
| 1   | 24.178     | BB | 0.4099   | 425.42981   | 16.06873 | 50.5380 |
| 2   | 29.943     | BB | 0.5160   | 416.37149   | 12.52117 | 49.4620 |

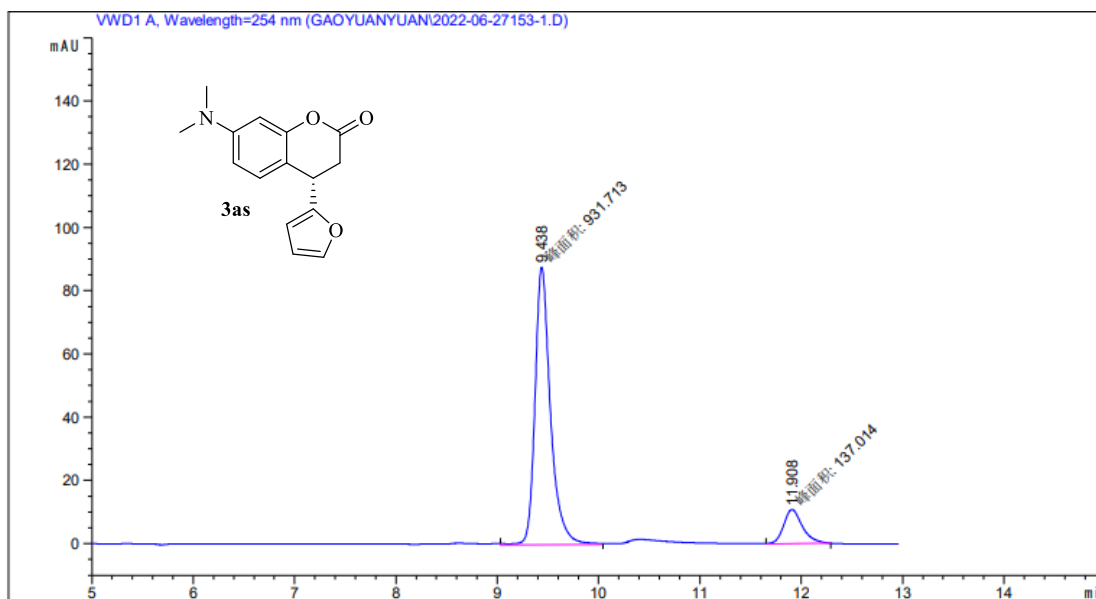

| 峰 # | 保留时间 [min] | 类型 | 峰宽 [min] | 峰面积 [mAU*s] | 峰高 [mAU] | 峰面积 %   |
|-----|------------|----|----------|-------------|----------|---------|
| 1   | 9.438      | MM | 0.1768   | 931.71338   | 87.80967 | 87.1797 |
| 2   | 11.908     | MM | 0.2127   | 137.01357   | 10.73601 | 12.8203 |

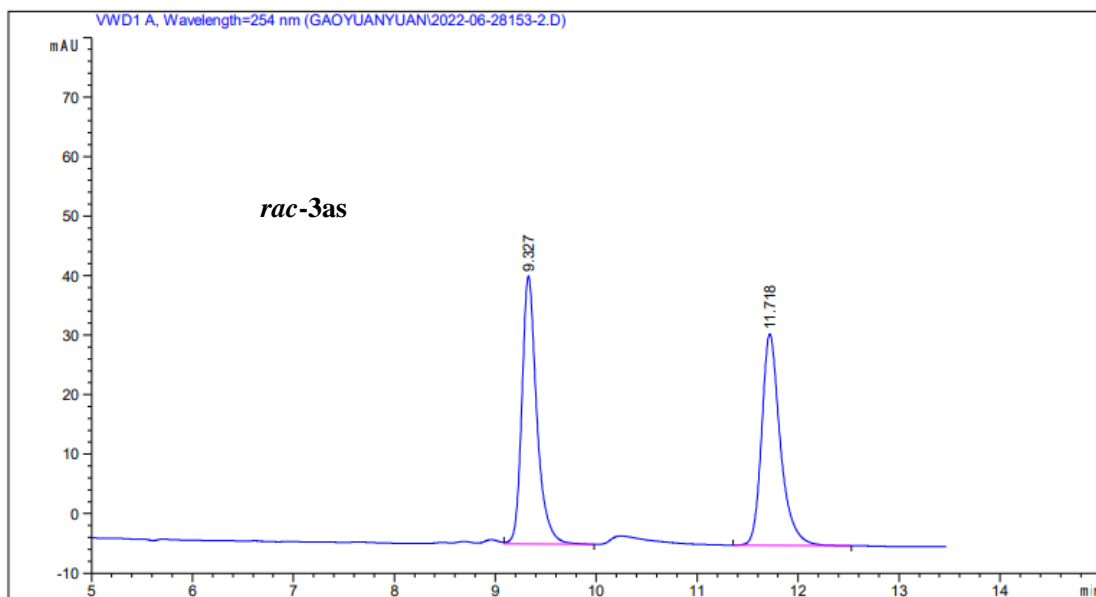

| 峰 # | 保留时间 [min] | 类型 | 峰宽 [min] | 峰面积 [mAU*s] | 峰高 [mAU] | 峰面积 %   |
|-----|------------|----|----------|-------------|----------|---------|
| 1   | 9.327      | VB | 0.1545   | 461.33395   | 45.02203 | 50.2253 |
| 2   | 11.718     | BB | 0.1931   | 457.19550   | 35.52795 | 49.7747 |



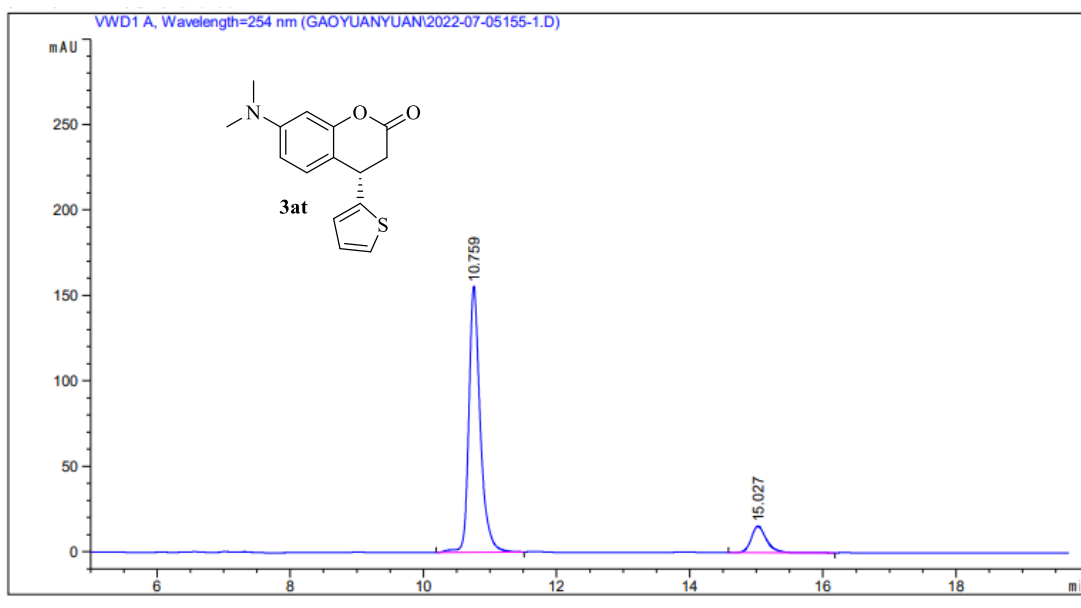

| 峰 # | 保留时间 [min] | 类型 | 峰宽 [min] | 峰面积 [mAU*s] | 峰高 [mAU]  | 峰面积 %   |
|-----|------------|----|----------|-------------|-----------|---------|
| 1   | 10.759     | BB | 0.1774   | 1847.10168  | 155.69687 | 88.1676 |
| 2   | 15.027     | BB | 0.2409   | 247.88731   | 15.47609  | 11.8324 |

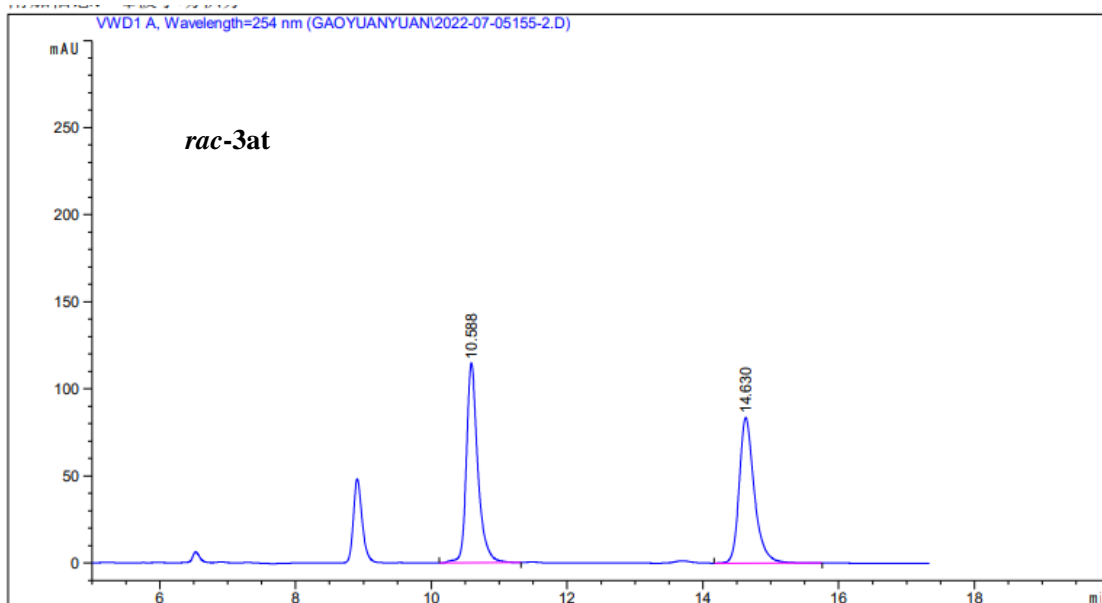

| 峰 # | 保留时间 [min] | 类型 | 峰宽 [min] | 峰面积 [mAU*s] | 峰高 [mAU]  | 峰面积 %   |
|-----|------------|----|----------|-------------|-----------|---------|
| 1   | 10.588     | BB | 0.1750   | 1345.30969  | 114.59695 | 50.9932 |
| 2   | 14.630     | BB | 0.2321   | 1292.90186  | 83.75344  | 49.0068 |

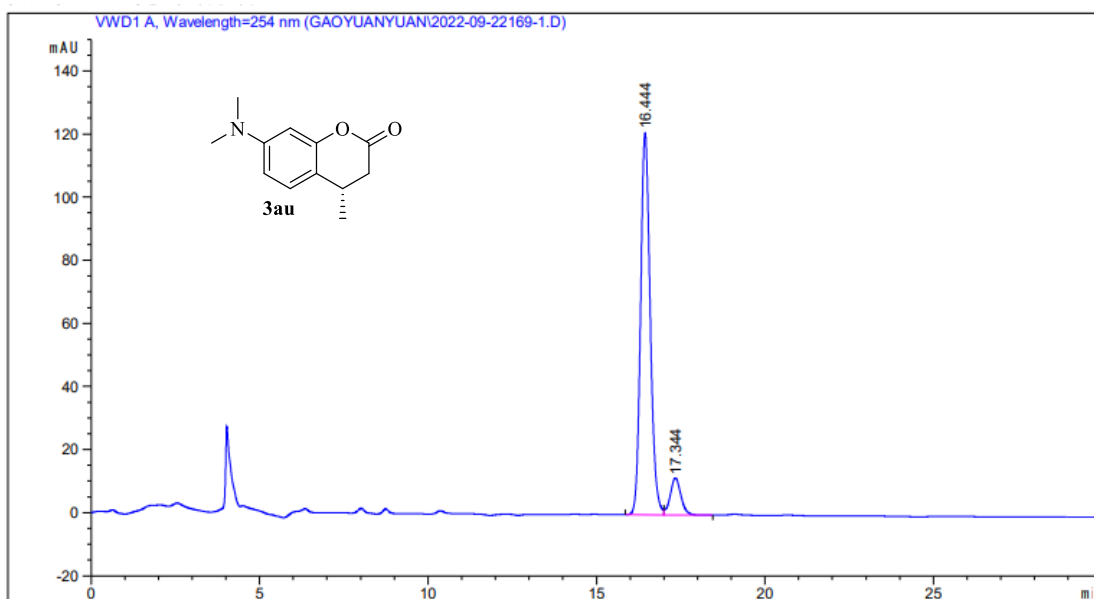

| 峰 # | 保留时间 [min] | 类型 | 峰宽 [min] | 峰面积 [mAU*s] | 峰高 [mAU]  | 峰面积 %   |
|-----|------------|----|----------|-------------|-----------|---------|
| 1   | 16.444     | BV | 0.3072   | 2398.81885  | 121.06214 | 90.2806 |
| 2   | 17.344     | VB | 0.3362   | 258.25137   | 11.76237  | 9.7194  |

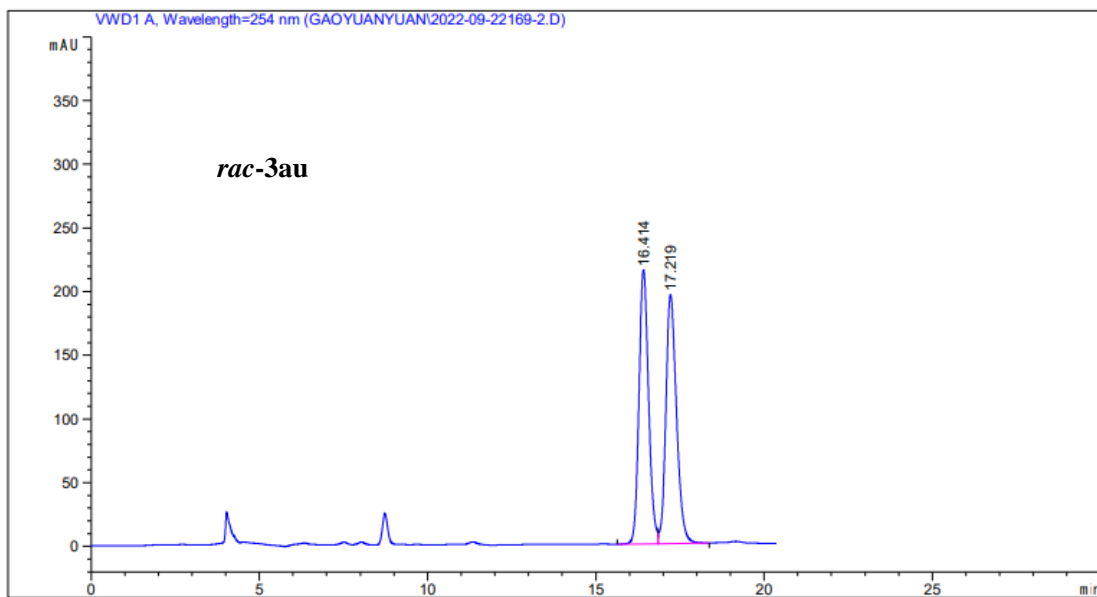

| 峰 # | 保留时间 [min] | 类型 | 峰宽 [min] | 峰面积 [mAU*s] | 峰高 [mAU]  | 峰面积 %   |
|-----|------------|----|----------|-------------|-----------|---------|
| 1   | 16.414     | BV | 0.3031   | 4263.84424  | 215.25920 | 49.8747 |
| 2   | 17.219     | VB | 0.3361   | 4285.26416  | 195.23238 | 50.1253 |

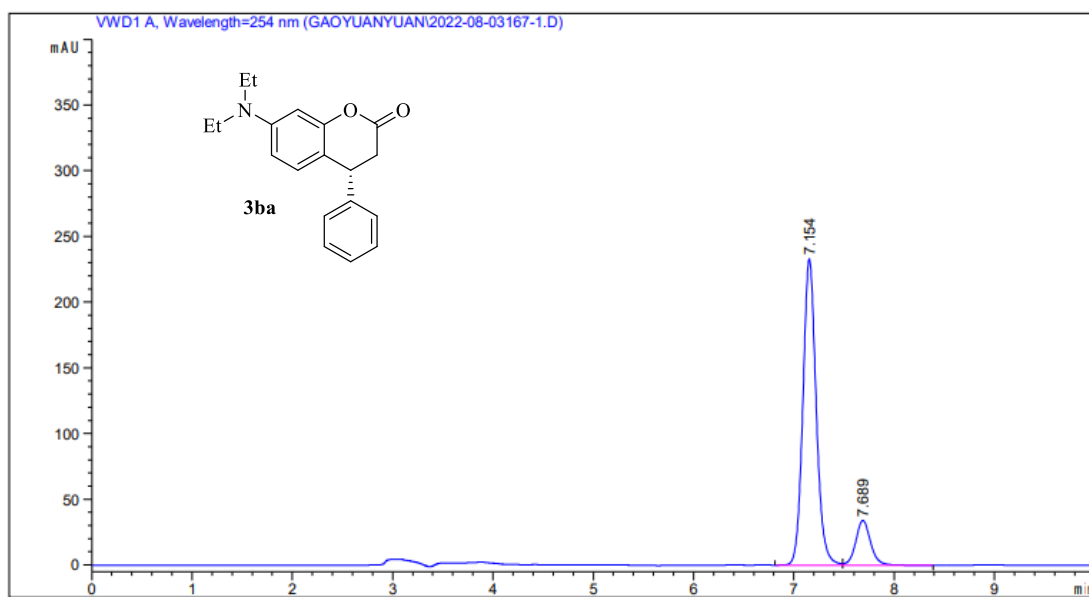

| 峰 # | 保留时间 [min] | 类型 | 峰宽 [min] | 峰面积 [mAU*s] | 峰高 [mAU]  | 峰面积 %   |
|-----|------------|----|----------|-------------|-----------|---------|
| 1   | 7.154      | BV | 0.1404   | 2144.98975  | 232.93689 | 85.9566 |
| 2   | 7.689      | VB | 0.1569   | 350.44247   | 34.10397  | 14.0434 |

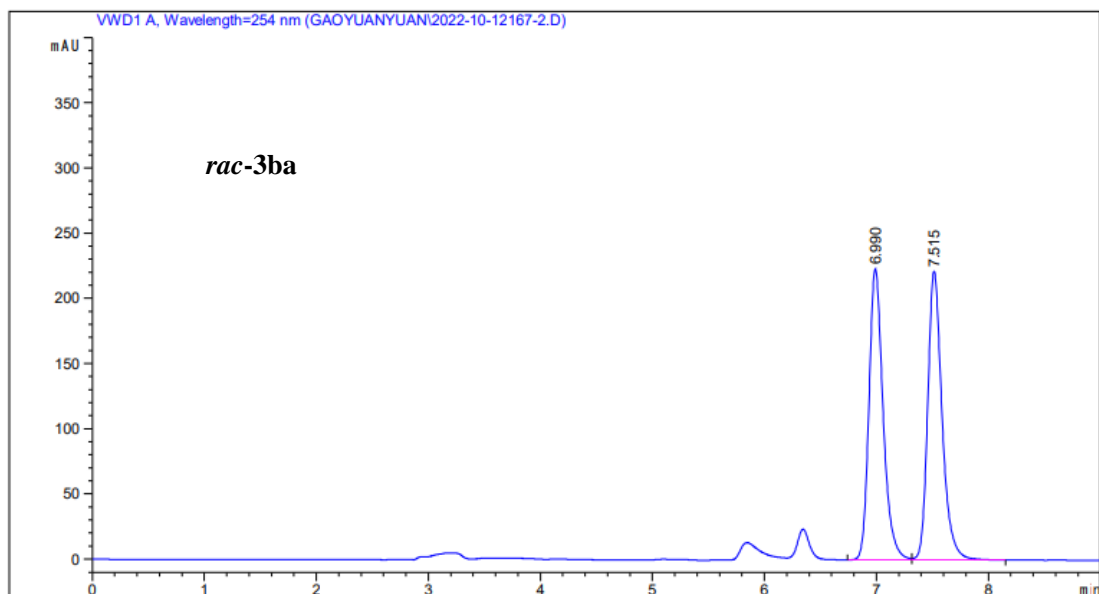

| 峰 # | 保留时间 [min] | 类型 | 峰宽 [min] | 峰面积 [mAU*s] | 峰高 [mAU]  | 峰面积 %   |
|-----|------------|----|----------|-------------|-----------|---------|
| 1   | 6.990      | BV | 0.1332   | 1956.85742  | 223.27641 | 49.8348 |
| 2   | 7.515      | VB | 0.1348   | 1969.82813  | 221.43661 | 50.1652 |

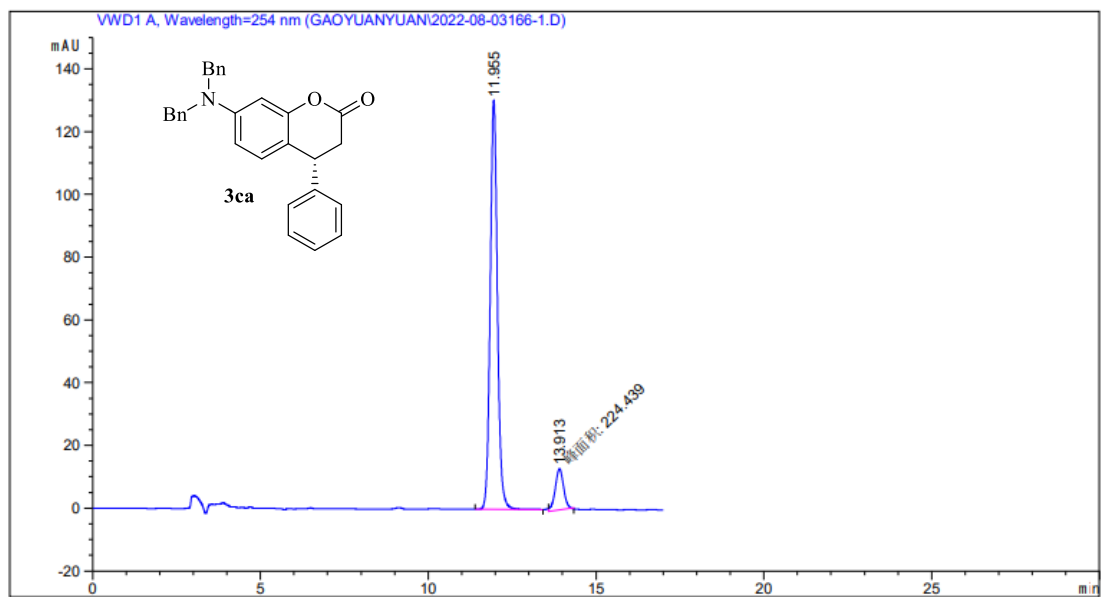

| 峰 # | 保留时间 [min] | 类型 | 峰宽 [min] | 峰面积 [mAU*s] | 峰高 [mAU]  | 峰面积 %   |
|-----|------------|----|----------|-------------|-----------|---------|
| 1   | 11.955     | BV | 0.2268   | 1950.97095  | 130.19565 | 89.6829 |
| 2   | 13.913     | MM | 0.2855   | 224.43913   | 13.09992  | 10.3171 |

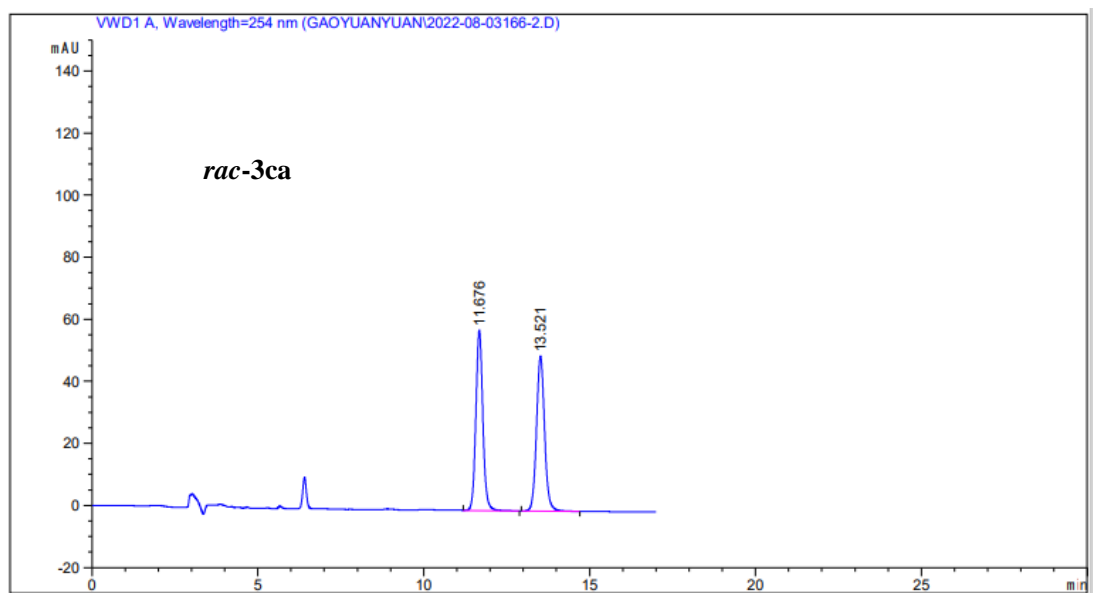

| 峰 # | 保留时间 [min] | 类型 | 峰宽 [min] | 峰面积 [mAU*s] | 峰高 [mAU] | 峰面积 %   |
|-----|------------|----|----------|-------------|----------|---------|
| 1   | 11.676     | VB | 0.2230   | 851.83667   | 58.11563 | 50.1140 |
| 2   | 13.521     | BB | 0.2623   | 847.96136   | 49.89349 | 49.8860 |

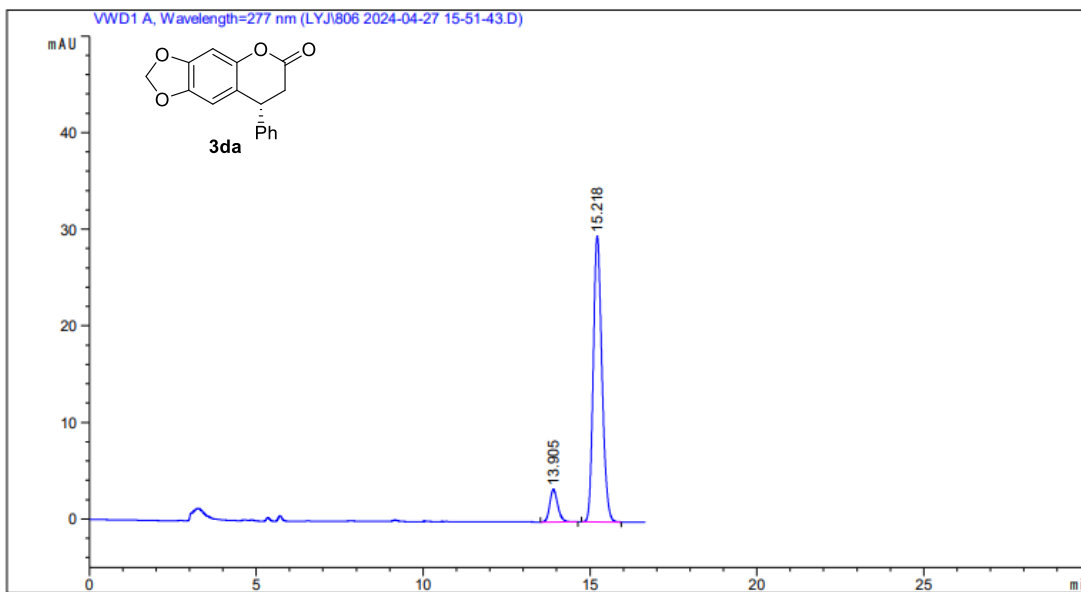

| 峰 # | 保留时间 [min] | 类型 | 峰宽 [min] | 峰面积 [mAU*s] | 峰高 [mAU] | 峰面积 %   |
|-----|------------|----|----------|-------------|----------|---------|
| 1   | 13.905     | BB | 0.2544   | 55.80571    | 3.36636  | 9.4615  |
| 2   | 15.218     | BB | 0.2774   | 534.01392   | 29.61370 | 90.5385 |

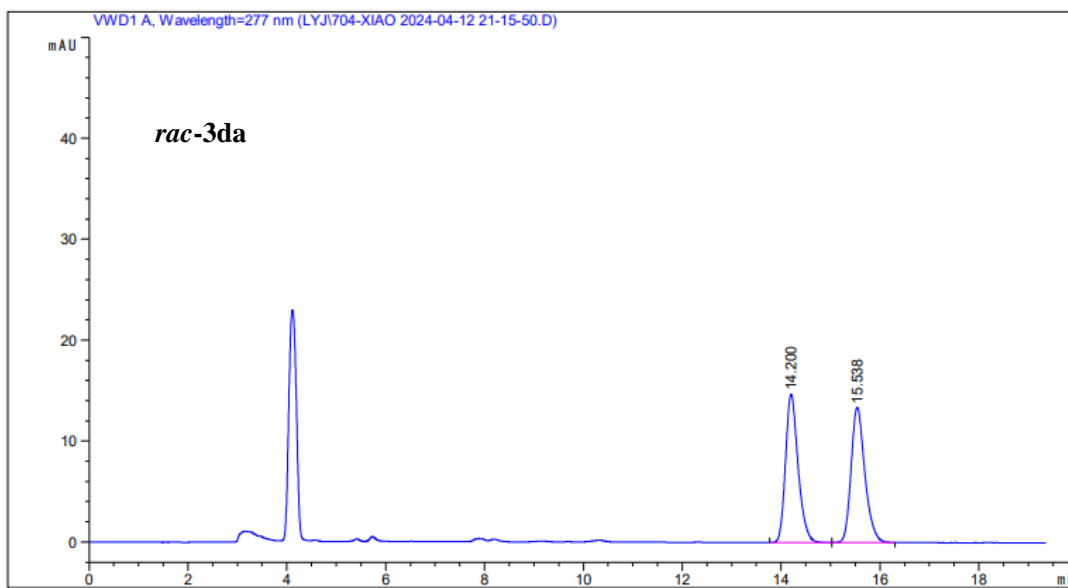

| 峰 # | 保留时间 [min] | 类型 | 峰宽 [min] | 峰面积 [mAU*s] | 峰高 [mAU] | 峰面积 %   |
|-----|------------|----|----------|-------------|----------|---------|
| 1   | 4          | BB | 0.2678   | 259.20071   | 14.69171 | 50.0468 |
| 2   | 14.200     | BB | 0.2945   | 258.71643   | 13.38516 | 49.9532 |

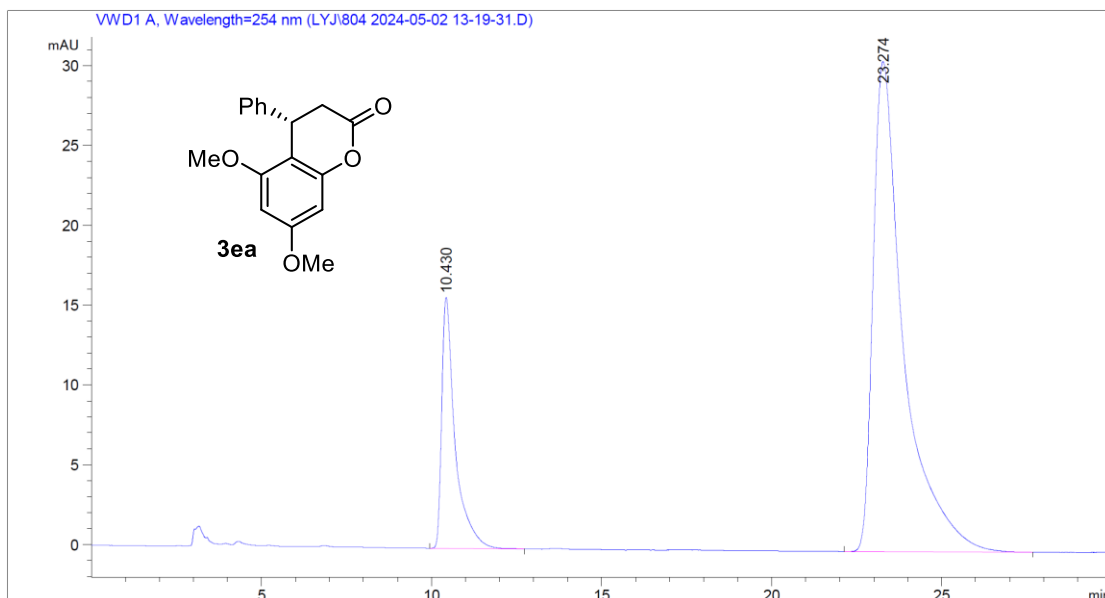

| 峰 # | 保留时间 [min] | 类型 | 峰宽 [min] | 峰面积 [mAU*s] | 峰高 [mAU] | 峰面积 %   |
|-----|------------|----|----------|-------------|----------|---------|
| 1   | 10.430     | BB | 0.3984   | 428.48227   | 15.70181 | 18.3727 |
| 2   | 23.274     | BB | 0.9074   | 1903.68701  | 30.69971 | 81.6273 |

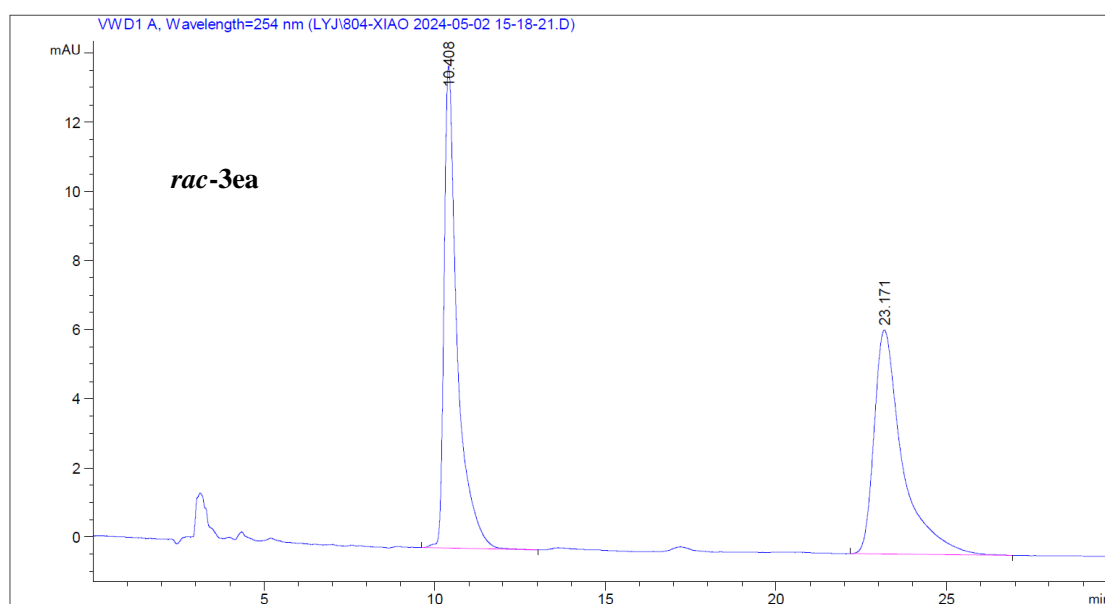

| 峰 # | 保留时间 [min] | 类型 | 峰宽 [min] | 峰面积 [mAU*s] | 峰高 [mAU] | 峰面积 %   |
|-----|------------|----|----------|-------------|----------|---------|
| 1   | 10.408     | BB | 0.3898   | 375.20584   | 13.95162 | 50.1417 |
| 2   | 23.171     | BB | 0.8430   | 373.08466   | 6.48728  | 49.8583 |

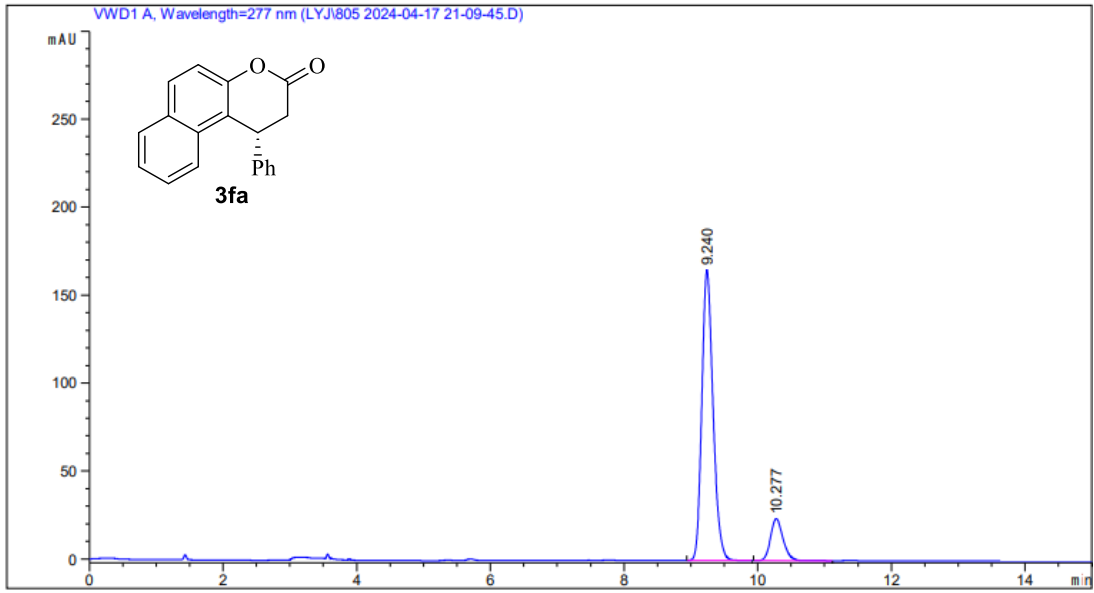

| 峰 # | 保留时间 [min] | 类型 | 峰宽 [min] | 峰面积 [mAU*s] | 峰高 [mAU]  | 峰面积 %   |
|-----|------------|----|----------|-------------|-----------|---------|
| 1   | 9.240      | BB | 0.1786   | 1919.80151  | 165.21605 | 86.1638 |
| 2   | 10.277     | BB | 0.1980   | 308.28311   | 23.82517  | 13.8362 |

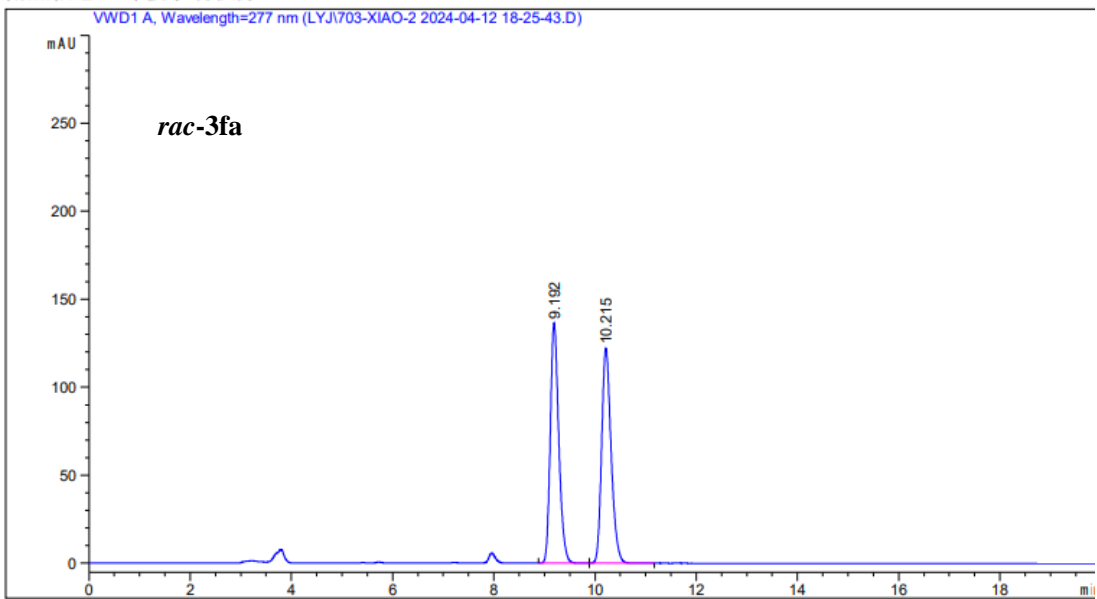

| 峰 # | 保留时间 [min] | 类型 | 峰宽 [min] | 峰面积 [mAU*s] | 峰高 [mAU]  | 峰面积 %   |
|-----|------------|----|----------|-------------|-----------|---------|
| 1   | 9.192      | BB | 0.1763   | 1583.23328  | 136.53323 | 49.9885 |
| 2   | 10.215     | BB | 0.1983   | 1583.96228  | 122.10886 | 50.0115 |

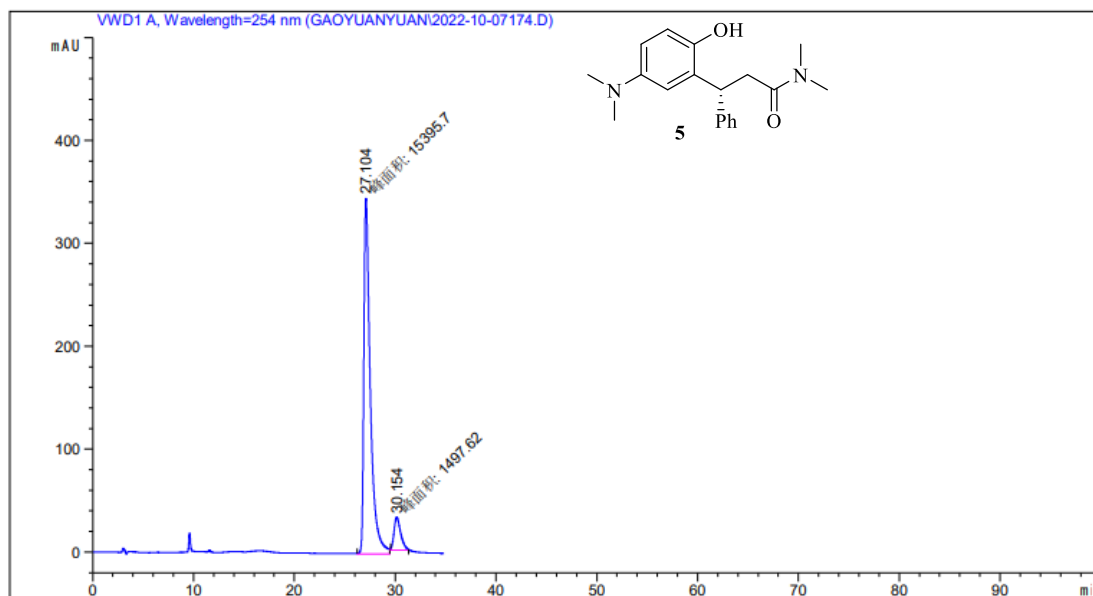

| 峰 # | 保留时间 [min] | 类型 | 峰宽 [min] | 峰面积 [mAU*s] | 峰高 [mAU]  | 峰面积 %   |
|-----|------------|----|----------|-------------|-----------|---------|
| 1   | 27.104     | MM | 0.7419   | 1.53957e4   | 345.84125 | 91.1348 |
| 2   | 30.154     | MM | 0.7753   | 1497.61755  | 32.19588  | 8.8652  |

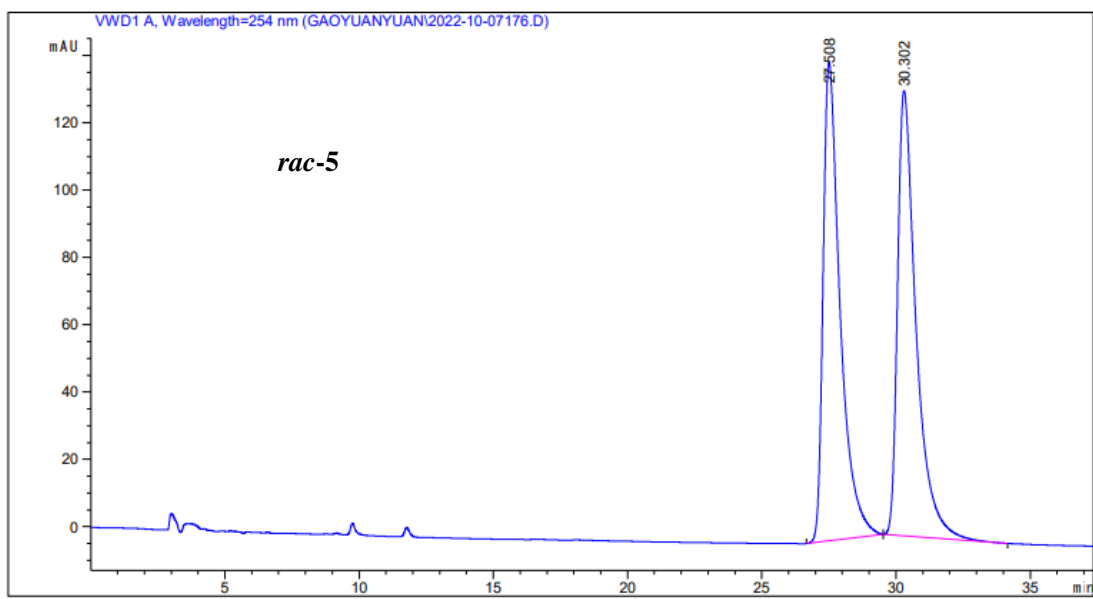

| 峰 # | 保留时间 [min] | 类型 | 峰宽 [min] | 峰面积 [mAU*s] | 峰高 [mAU]  | 峰面积 %   |
|-----|------------|----|----------|-------------|-----------|---------|
| 1   | 27.104     | MM | 0.7419   | 1.53957e4   | 345.84125 | 91.1348 |
| 2   | 30.154     | MM | 0.7753   | 1497.61755  | 32.19588  | 8.8652  |
